# Supplementary material for: Effect of smog on the anatomy of oat leaves
Source: Royal Society of Chemistry journal article supplement (doi:10.1039/d1cc02326h), 1952-10-01
Supplement: d1cc02326h1.pdf [file d1cc02326h1.pdf]

## Supplementary Information

### Facile Synthesis of Tribenzosilepins from Terphenyls and Dihydrosilanes by Electrophilic Double Silylation

Yafang Dong<sup>1</sup>, Kohei Sekine<sup>1,2</sup>, Yoichiro Kuninobu\*<sup>1,2</sup>

<sup>1</sup>*Institute for Materials Chemistry and Engineering, Kyushu University, 6-1  
Kasugakoen, Kasuga-shi, Fukuoka 816-8580, Japan*

<sup>2</sup>*Department of Molecular and Material Sciences, Interdisciplinary Graduate School  
of Engineering Sciences, Kyushu University, 6-1 Kasugakoen, Kasuga-shi, Fukuoka  
816-8580, Japan*

#### Contents

|                                                                                      |     |
|--------------------------------------------------------------------------------------|-----|
| 1. General.....                                                                      | S2  |
| 2. Synthesis and Characterization of Substrates .....                                | S2  |
| 3. General Procedure for Synthesis of Silepin Derivatives by a Borane Catalyst ..... | S6  |
| 4. Variable Temperature <sup>1</sup> H NMR of <b>3g</b> .....                        | S12 |
| 5. Optical Properties of <b>3a</b> , <b>3f</b> , <b>5</b> , <b>9</b> .....           | S13 |
| 6. X-ray Structures of Compounds <b>3a</b> , <b>5</b> , <b>9</b> .....               | S14 |
| 7. References .....                                                                  | S38 |
| 8. NMR Spectra .....                                                                 | S39 |

## 1. General

All reactions were performed under an inert atmosphere using standard Schlenk techniques or in glovebox. All reagents were purchased from commercial sources and used without further purification unless otherwise specified. Silica gel column chromatography was carried using Silica gel 60 (Kanto Chemical, particle size: 40–50  $\mu\text{m}$  or 63–210  $\mu\text{m}$ ). NMR spectra were recorded on JEOL JNM-ECA600 (600 MHz for  $^1\text{H}$  NMR, 150 MHz for  $^{13}\text{C}$  NMR), JEOL ECZ-400 (400 MHz for  $^1\text{H}$  NMR, 100 MHz for  $^{13}\text{C}$  NMR), JEOL JNM-LA400 (400 MHz for  $^1\text{H}$  NMR, 100 MHz for  $^{13}\text{C}$  NMR) spectrometers. Proton and carbon chemical shifts are reported relative to tetramethylsilane (TMS,  $\delta$  0.00 ( $^1\text{H}$  NMR,  $^{13}\text{C}$  NMR)) or the residual solvent ( $\text{CHCl}_3$  ( $\delta$  7.26 for  $^1\text{H}$  NMR or  $\delta$  77.16 for  $^{13}\text{C}$  NMR),  $\text{CH}_2\text{Cl}_2$  ( $\delta$  5.32 for  $^1\text{H}$  NMR or  $\delta$  53.84 for  $^{13}\text{C}$  NMR), DMSO ( $\delta$  2.49 for  $^1\text{H}$  NMR or  $\delta$  39.6 for  $^{13}\text{C}$  NMR)) used as an internal reference. HRMS were measured on a JEOL JMS-700 spectrometer. UV/vis absorption and photoluminescence (PL) spectra were measured with a V650 spectrophotometer (JASCO), and C9920-02 (Hamamatsu Photonics).

3-Bromo-*N,N*-dimethylaniline,<sup>1</sup> (3-(dimethylamino)phenyl)boronic acid,<sup>2</sup> 9,9-dihydro-9-silafluorenes,<sup>3</sup> 1,2-dibromo-4,5-diiodobenzene,<sup>4</sup> Turbo Grignard reagents,<sup>5</sup> and 1-(hexyloxy)-3-iodobenzene,<sup>6</sup> 3,4-dibromoaniline,<sup>7</sup> 3,4-dibromo-*N,N*-dimethylaniline<sup>1</sup> were prepared according to the literature procedures.

## 2. Synthesis and Characterization of Substrates

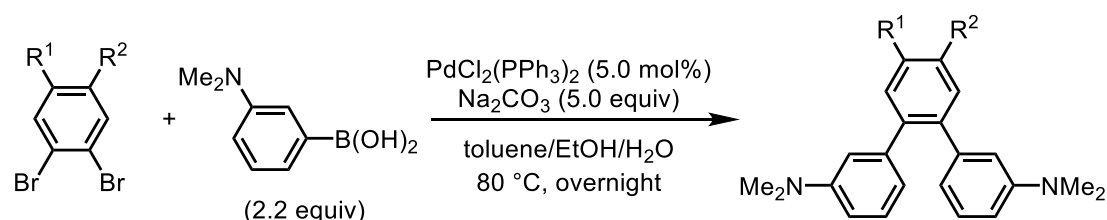

### *N*<sup>3</sup>,*N*<sup>3</sup>,*N*<sup>3''</sup>,*N*<sup>3''</sup>-Tetramethyl-[1,1':2',1''-terphenyl]-3,3''-diamine (**1a**)

Compound **1a** was synthesized by Suzuki-Miyaura coupling reaction.<sup>8</sup> A mixture of (3-(dimethylamino)phenyl)boronic acid (0.550 g, 8.80 mmol, 2.2 equiv), 1,2-dibromobenzene (0.940 g, 4.00 mmol, 1.0 equiv),  $\text{Na}_2\text{CO}_3$  (2.10 g, 20.0 mmol, 5.0 equiv) and  $\text{PdCl}_2(\text{PPh}_3)_2$  (0.140 mg, 0.200 mmol, 5.0 mol%) in a mixture of toluene (30 mL), water (4.0 mL) and ethanol (8.0 mL) was heated to 80 °C under nitrogen atmosphere. After the completion of the reaction monitored by TLC, the mixture was cooled to room temperature, then diluted with water and EtOAc. The aqueous layer was extracted with EtOAc (3  $\times$  50 mL). The combined organic phases were dried over  $\text{MgSO}_4$  and concentrated under reduced pressure. The crude product was then purified further by column chromatography (eluent: hexane/ethyl acetate = 15:1) on silica gel

to give **1a** (0.970 g, 76%) as colorless oil.  $^1\text{H NMR}$  (400 MHz,  $\text{CDCl}_3$ ):  $\delta$  7.47 (dd,  $J = 5.5, 3.7$  Hz, 2H), 7.38–7.41 (m, 2H), 7.11 (dd,  $J = 8.0, 8.0$  Hz, 2H), 6.58–6.61 (m, 4H), 6.53 (s, 2H), 2.76 (s, 12H);  $^{13}\text{C NMR}$  (100 MHz,  $\text{CDCl}_3$ ):  $\delta$  150.4, 142.5, 141.5, 130.5, 128.6, 127.3, 118.7, 115.4, 111.3, 40.9; HRMS(EI<sup>+</sup>) Calcd for  $\text{C}_{22}\text{H}_{24}\text{N}_2$  ( $[\text{M}]^+$ ) 316.1934, Found 316.1939.

***N*<sup>3</sup>,*N*<sup>3</sup>,*N*<sup>3''</sup>,*N*<sup>3''</sup>,4'-Pentamethyl-[1,1':2',1''-terphenyl]-3,3''-diamine (1b)**

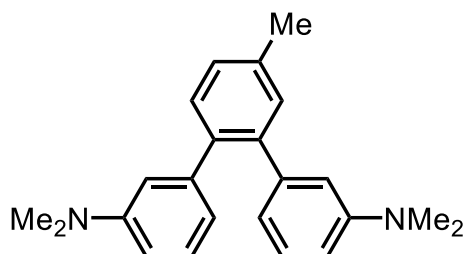

The same method as **1a**. A mixture of (3-(dimethylamino)phenyl)boronic acid (0.730 g, 4.40 mmol, 2.2 equiv), 1,2-dibromo-4-methylbenzene (0.500 g, 2.00 mmol, 1.0 equiv),  $\text{Na}_2\text{CO}_3$  (1.10 g, 10.0 mmol, 5.0 equiv) and  $\text{Pd}(\text{PPh}_3)_4$  (120 mg, 0.100 mmol, 5.0 mol%) in a mixture of toluene (20 mL), water (3.0 mL) and ethanol (6.0 mL) was heated to 80 °C under nitrogen atmosphere. After the completion of the reaction monitored by TLC, the mixture was cooled to room temperature, then diluted with water and EtOAc. The aqueous layer was extracted with EtOAc (3 × 30 mL). The combined organic phases were dried over  $\text{MgSO}_4$  and concentrated under reduced pressure. The crude product was then purified further by column chromatography (eluent: hexane/ethyl acetate = 20:1) on silica gel to give **1b** (0.48 g, 68%) as colorless oil.  $^1\text{H NMR}$  (400 MHz,  $\text{CDCl}_3$ ):  $\delta$  7.37 (d,  $J = 7.8$  Hz, 1H), 7.29 (s, 1H), 7.21 (dd,  $J = 7.8, 1.8$  Hz, 1H), 7.07–7.12 (m, 2H), 6.57–6.60 (m, 4H), 6.51–6.53 (m, 2H), 2.76 (s, 6H), 2.75 (s, 6H), 2.43 (s, 3H);  $^{13}\text{C NMR}$  (100 MHz,  $\text{CDCl}_3$ ):  $\delta$  150.39, 150.37, 142.6, 142.4, 141.3, 138.7, 137.0, 131.2, 130.4, 128.5, 128.0, 118.8, 118.7, 115.5, 115.4, 111.3, 111.1, 40.9, 21.3; HRMS(EI<sup>+</sup>) Calcd for  $\text{C}_{23}\text{H}_{26}\text{N}_2$  ( $[\text{M}]^+$ ) 330.2091, Found 330.2097.

***N*<sup>3</sup>,*N*<sup>3</sup>,*N*<sup>3'</sup>,*N*<sup>3'</sup>,*N*<sup>4'</sup>,*N*<sup>4'</sup>-hexamethyl-[1,1':2',1''-terphenyl]-3,3',4'-triamine (1c)**

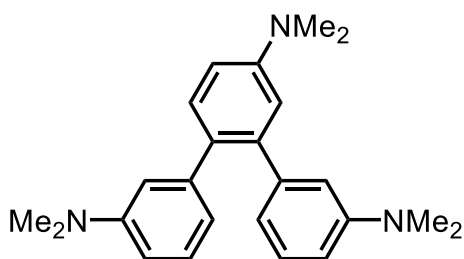

The same method as **1a**. A mixture of (3-(dimethylamino)phenyl)boronic acid (0.623 g, 3.75 mmol, 2.5 equiv), 3,4-dibromo-*N,N*-dimethylaniline (0.426 g, 1.5 mmol, 1.0 equiv),  $\text{Na}_2\text{CO}_3$  (0.812 g, 7.5 mmol, 5.0 equiv) and  $\text{PdCl}_2(\text{PPh}_3)_2$  (57.8 mg, 0.075 mmol, 5.0 mol%) in a mixture of toluene (14 mL), degassed water (2.0 mL) and ethanol (2.0 mL) was heated to 80 °C under nitrogen. After the completion of the reaction monitored by TLC (12 h), the mixture was cooled to room temperature, then diluted with water and EtOAc. The aqueous layer was extracted with EtOAc (3 × 30 mL). The combined organic phases were dried over  $\text{Na}_2\text{SO}_4$  and concentrated under reduced pressure. The crude product was then purified further by column chromatography (eluent: hexane/ethyl acetate = 10:1) on silica gel to give **1c** (471 mg,

87%) as yellowish solid.  $^1\text{H}$  NMR (400 MHz,  $\text{CDCl}_3$ ):  $\delta$  7.40 (d,  $J = 8.7$  Hz, 1H), 7.09–7.17 (m, 2H), 6.86 (d,  $J = 2.3$  Hz, 1H), 6.83 (dd,  $J = 8.5, 3.0$  Hz, 1H), 6.60–6.70 (m, 5H), 6.53–6.54 (m, 1H), 3.03 (s, 6H), 2.79 (s, 6H), 2.76 (s, 6H);  $^{13}\text{C}$  NMR (100 MHz,  $\text{CDCl}_3$ ):  $\delta$  130.0, 128.6, 128.5, 119.2, 118.9, 115.9, 115.6, 114.7, 111.7, 111.4, 110.9, 41.11, 41.00, 40.85; HRMS(EI $^+$ ) Calcd for  $\text{C}_{24}\text{H}_{29}\text{N}_3$  ( $[\text{M}]^+$ ) 359.2356, Found 359.2361.

**4',5'-difluoro- $N^3,N^3,N^{3'}$ , $N^{3''}$ -tetramethyl-[1,1':2',1''-terphenyl]-3,3''-diamine (1d)**

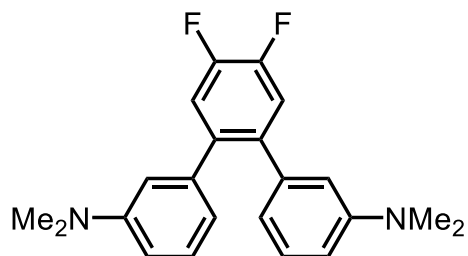

The same method as **1a**. A mixture of (3-(dimethylamino)phenyl)boronic acid (0.500 g, 3.00 mmol, 3.0 equiv), 1,2-dibromo-4,5-difluorobenzene (0.278 g, 1.00 mmol, 1.0 equiv),  $\text{Na}_2\text{CO}_3$  (0.546 g, 5.20 mmol, 5.0 equiv) and  $\text{PdCl}_2(\text{PPh}_3)_2$  (37.0 mg, 0.050 mmol, 5.0 mol%) in a mixture of toluene (10 mL), degassed water (1.5 mL) and ethanol (1.5 mL) was heated to 80 °C under nitrogen. After the completion of the reaction monitored by TLC, the mixture was cooled to room temperature, then diluted with water and EtOAc. The aqueous layer was extracted with EtOAc (3  $\times$  30 mL). The combined organic phases were dried over  $\text{Na}_2\text{SO}_4$  and concentrated under reduced pressure. The crude product was then purified further by column chromatography (eluent: hexane/ethyl acetate = 20:1) on silica gel to give **1d** (198 mg, 56%) as colorless oil.  $^1\text{H}$  NMR (400 MHz,  $\text{CD}_2\text{Cl}_2$ ):  $\delta$  7.25–7.30 (m, 2H), 7.10 (dd,  $J = 7.6, 8.4$  Hz, 2H), 6.64 (dd,  $J = 8.2, 2.3$  Hz, 2H), 6.54 (d,  $J = 7.3$  Hz, 2H), 6.48–6.49 (m, 2H), 2.78 (s, 12H);  $^{13}\text{C}$  NMR (100 MHz,  $\text{CD}_2\text{Cl}_2$ ):  $\delta$  150.6, 149.4 (dd,  $J = 248.5, 14.4$  Hz), 141.0, 138.6 (dd,  $J = 7.3, 5.6$  Hz), 129.0, 119.2 (dd,  $J = 15.8, 10.1$  Hz), 118.6, 115.2, 111.9, 40.9; HRMS(EI $^+$ ) Calcd for  $\text{C}_{22}\text{H}_{22}\text{F}_2\text{N}_2$  ( $[\text{M}]^+$ ) 352.1746, Found 352.1752.

**4',5'-Dibromo- $N^3,N^3,N^{3'}$ , $N^{3''}$ -tetramethyl-[1,1':2',1''-terphenyl]-3,3''-diamine (1e)**

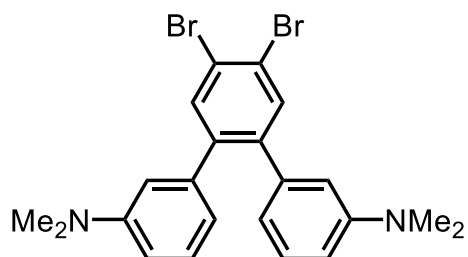

The same method as **1a**. A mixture of (3-(dimethylamino)phenyl)boronic acid (0.18 g, 1.1 mmol, 2.2 equiv), 1,2-dibromo-4,5-diodobenzene (0.240 g, 0.50 mmol, 1.0 equiv),  $\text{Na}_2\text{CO}_3$  (0.270 g, 2.5 mmol, 5.0 equiv) and  $\text{PdCl}_2(\text{PPh}_3)_2$  (18.0 mg, 0.0250 mmol, 5.0 mol%) in a mixture of toluene (10 mL), degassed water (2.0 mL) and ethanol (4.0 mL) was heated to 50 °C under nitrogen. After the completion of the reaction monitored by TLC, the mixture was cooled to room temperature, then diluted with water and EtOAc. The aqueous layer was extracted with EtOAc (3  $\times$  20 mL). The combined organic phases were dried over  $\text{MgSO}_4$  and concentrated under reduced pressure. The crude product was then purified further by column

chromatography (eluent: hexane/ethyl acetate = 20:1) on silica gel to give **1e** (203 mg, 85%) as colorless oil. <sup>1</sup>H NMR (400 MHz, CDCl<sub>3</sub>): δ 7.70 (s, 2H), 7.11 (dd, *J* = 8.0, 8.0 Hz, 2H), 6.59 (d, *J* = 7.7 Hz, 4H), 6.45 (s, 2H), 2.77 (s, 12H); <sup>13</sup>C NMR (100 MHz, CDCl<sub>3</sub>): δ 150.3, 142.1, 140.2, 135.1, 128.9, 123.3, 118.5, 114.8, 112.0, 40.9; HRMS(EI<sup>+</sup>) Calcd for C<sub>22</sub>H<sub>22</sub>Br<sub>2</sub>N<sub>2</sub> ([M]<sup>+</sup>) 472.0145, Found 472.0149.

### 3,3'-(Naphthalene-2,3-diyl)bis(*N,N*-dimethylaniline) (**1f**)

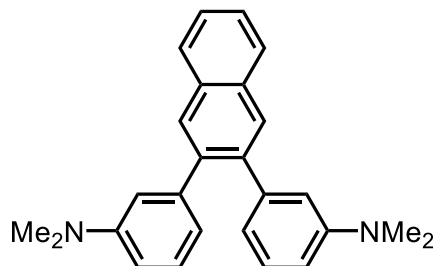

The same method as **1a**. A mixture of (3-(dimethylamino)phenyl)boronic acid (0.550 g, 3.30 mmol, 2.2 equiv), naphthalene-2,3-diyl bis(trifluoromethanesulfonate) (0.640 g, 1.50 mmol, 1.0 equiv), Na<sub>2</sub>CO<sub>3</sub> (0.800 g, 7.50 mmol, 5.0 equiv) and PdCl<sub>2</sub>(PPh<sub>3</sub>)<sub>2</sub> (53.0 mg, 0.0750 mmol, 5.0 mol%) in a mixture of toluene (15 mL), water (2.0 mL) and ethanol (4.0 mL) was heated to 80 °C under nitrogen. After completion of the reaction monitored by TLC, the mixture was cooled to room temperature, then diluted with water and EtOAc. The aqueous layer was extracted with EtOAc (3 × 20 mL). The combined organic phases were dried over MgSO<sub>4</sub> and concentrated under reduced pressure. The crude product was then purified further by column chromatography (eluent: hexane/ethyl acetate = 15:1) on silica gel to give **1f** (0.59 g, quant) as a white solid. <sup>1</sup>H NMR (400 MHz, CDCl<sub>3</sub>): δ 7.93 (s, 2H), 7.88 (dd, *J* = 6.4, 3.2 Hz, 2H), 7.49 (dd, *J* = 6.0, 3.2 Hz, 2H), 7.14 (dd, *J* = 8.0, 8.0 Hz, 2H), 6.69 (d, *J* = 7.8 Hz, 2H), 6.60–6.64 (m, 4H), 2.78 (s, 12H); <sup>13</sup>C NMR (100 MHz, CDCl<sub>3</sub>): δ 150.4, 142.4, 140.1, 132.7, 129.1, 128.6, 127.8, 126.2, 118.8, 115.5, 111.4, 40.9; HRMS(EI<sup>+</sup>) Calcd for C<sub>26</sub>H<sub>26</sub>N<sub>2</sub> ([M]<sup>+</sup>) 366.2091, Found 366.2094.

### 4',5'-Bis(3-(dimethylamino)phenyl)-*N*<sup>3</sup>,*N*<sup>3</sup>,*N*<sup>3''</sup>,*N*<sup>3''</sup>-tetramethyl-[1,1':2',1''-terphenyl]-3,3''-diamine (**4**)

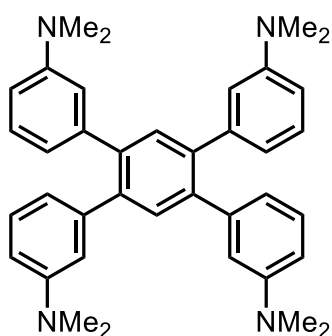

The same method as **1a**. A mixture of (3-(dimethylamino)phenyl)boronic acid (1.50 g, 9.00 mmol, 4.5 equiv), 1,2,4,5-tetrabromobenzene (0.790 g, 2.00 mmol, 1.0 equiv), Na<sub>2</sub>CO<sub>3</sub> (2.10 g, 20.0 mmol, 10 equiv) and PdCl<sub>2</sub>(PPh<sub>3</sub>)<sub>2</sub> (0.14 g, 0.2 mmol, 10 mol%) in a mixture of toluene (25 mL), water (3.0 mL) and ethanol (6.0 mL) was heated to 80 °C under nitrogen. After the completion of the reaction monitored by TLC, the mixture was cooled to room temperature, then diluted with water and EtOAc. The aqueous layer was extracted with EtOAc (3 × 30 mL). The combined organic phases were dried over MgSO<sub>4</sub> and concentrated under reduced pressure. The crude product was then purified further by column chromatography (eluent: dichloromethane/hexane = 5:1) on silica gel to give **4** (0.43 g, 39%) as a pale yellow powder. <sup>1</sup>H NMR (400 MHz, CDCl<sub>3</sub>): δ 7.64 (s, 2H), 7.11 (dd, *J* = 8.0, 8.0 Hz, 4H), 6.60–6.66 (m, 12H), 2.78 (s, 24H); <sup>13</sup>C NMR (100 MHz, CDCl<sub>3</sub>): δ 150.5, 142.1, 140.3,

132.5, 128.6, 118.8, 115.2, 111.2, 40.9; HRMS(EI<sup>+</sup>) Calcd for C<sub>38</sub>H<sub>42</sub>N<sub>4</sub> ([M]<sup>+</sup>) 554.3404, Found 554.3409.

### 3. General Procedure for Synthesis of Silepin Derivatives by a

#### Borane Catalyst<sup>9</sup>

To a test tube with a screw cap equipped with a magnetic stir bar was charged biphenyl **1a** (63.0 mg, 0.200 mmol, 1.0 equiv) and tris(pentafluorophenyl)borane (B(C<sub>6</sub>F<sub>5</sub>)<sub>3</sub>, 3.10 mg, 0.00600 mmol, 3.0 mol%). The test tube was evacuated and filled with nitrogen. Chlorobenzene (0.40 mL) was added via syringe. Diphenylsilane **2a** (55.3 μL, 0.30 mmol, 1.5 equiv) and 2,6-lutidine (1.70 μL, 0.0150 mmol, 7.5 mol%) were then added to the mixture. The test tube was closed with a cap. The reaction mixture was stirred at 100 °C (oil bath) for 24 h. After the completion of the reaction, the mixture was cooled to room temperature. The desired silepin **3a** was obtained by column chromatography (eluent: hexane/ethyl acetate = 20:1) on silica gel in 80% isolated yield.

#### *N*<sup>6</sup>,*N*<sup>6</sup>,*N*<sup>12</sup>,*N*<sup>12</sup>-Tetramethyl-9,9-diphenyl-9*H*-tribenzo[*b,d,f*]silepin-6,12-diamine (**3a**)

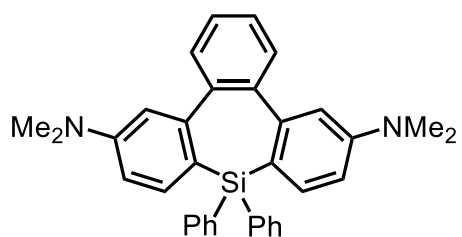

**3a** was obtained as a white solid (80 mg, 80%). <sup>1</sup>H NMR (400 MHz, CDCl<sub>3</sub>): δ 7.56 (dd, *J* = 7.9, 1.7 Hz, 2H), 7.41–7.49 (m, 3H), 7.28 (d, *J* = 8.2 Hz, 2H), 7.17–7.22 (m, 4H), 7.06–7.11 (m, 3H), 6.99 (dd, *J* = 7.4, 7.4 Hz, 2H), 6.82 (d, *J* = 2.3 Hz, 2H), 6.62 (dd, *J* = 8.2, 2.3 Hz, 2H), 2.96 (s, 12H); <sup>13</sup>C NMR (100 MHz, CDCl<sub>3</sub>): δ 151.6, 148.7, 142.0, 137.9, 135.3, 134.8, 134.2, 133.0, 131.9, 129.6, 128.5, 127.8, 126.9, 126.7, 125.3, 114.9, 110.2, 40.4; HRMS(EI<sup>+</sup>) Calcd for C<sub>34</sub>H<sub>32</sub>N<sub>2</sub>Si ([M]<sup>+</sup>) 496.2330, Found 496.2333.

#### *N*<sup>6</sup>,*N*<sup>6</sup>,*N*<sup>12</sup>,*N*<sup>12</sup>-2-Pentamethyl-9,9-diphenyl-9*H*-tribenzo[*b,d,f*]silepin-6,12-diamine (**3b**)

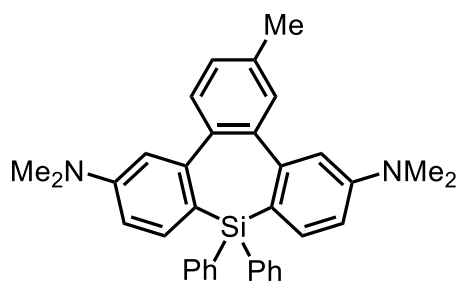

**3b** was obtained as a white solid (87 mg, 85%). <sup>1</sup>H NMR (400 MHz, CDCl<sub>3</sub>): δ 7.56 (dd, *J* = 8.0, 1.6 Hz, 2H), 7.40–7.48 (m, 3H), 7.25–7.27 (m, 2H), 7.17 (dd, *J* = 7.8, 1.4 Hz, 2H), 7.07–7.12 (m, 2H), 6.97–7.03 (m, 3H), 6.88 (dd, *J* = 7.8, 1.8 Hz, 1H), 6.81 (dd, *J* = 9.4, 2.5 Hz, 2H), 6.59–6.63 (m, 2H), 2.96 (s, 6H), 2.94 (s, 6H), 2.22 (s, 3H); <sup>13</sup>C NMR (100 MHz, CDCl<sub>3</sub>): δ 151.59, 151.56, 148.8, 148.7, 141.8, 139.2, 137.9, 136.2, 135.4, 134.8, 134.7, 134.3, 133.1, 132.4, 131.9, 129.6, 128.4, 127.8, 127.4, 126.8, 125.3, 125.2, 119.6, 114.8, 110.2, 110.1, 40.5, 40.4, 21.0; HRMS(EI<sup>+</sup>) Calcd for C<sub>35</sub>H<sub>34</sub>N<sub>2</sub>Si ([M]<sup>+</sup>) 510.2486, Found 510.2490.

***N*<sup>2</sup>,*N*<sup>2</sup>,*N*<sup>6</sup>,*N*<sup>6</sup>,*N*<sup>12</sup>,*N*<sup>12</sup>-Hexamethyl-9,9-diphenyl-9*H*-tribenzo[*b,d,f*]silepin-2,6,12-triamine (3c)**

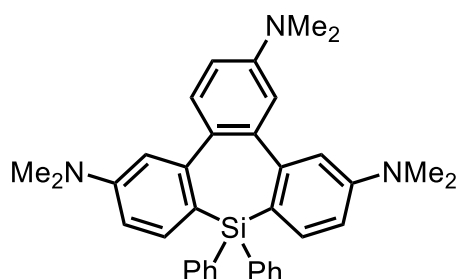

**3c** was obtained as a white solid (51 mg, 38%). <sup>1</sup>H NMR (400 MHz, CD<sub>2</sub>Cl<sub>2</sub>): δ 7.50–7.53 (m, 2H), 7.46–7.49 (m, 1H), 7.41–7.45 (m, 2H), 7.21 (dd, *J* = 8.2, 1.8 Hz, 2H), 7.17–7.19 (m, 2H), 7.12–7.16 (m, 1H), 7.02–7.06 (m, 3H), 6.84 (d, *J* = 2.3 Hz, 1H), 6.76 (s, 1H), 6.64 (dd, *J* = 8.5, 2.5 Hz, 1H), 6.56–6.61 (m, 3H), 2.96 (s, 6H), 2.95 (s, 6H), 2.85 (s, 6H); <sup>13</sup>C NMR (100 MHz, CDCl<sub>3</sub>): δ 151.6, 151.5, 149.4, 149.2, 148.9, 142.5, 137.9, 135.4, 134.7, 134.6, 134.5, 133.3, 132.8, 129.5, 128.4, 127.8, 126.8, 125.3, 125.2, 116.4, 114.9, 114.7, 112.4, 110.2, 109.7, 41.2, 40.5(2C) (one carbon is missing); HRMS(EI<sup>+</sup>) Calcd for C<sub>36</sub>H<sub>37</sub>N<sub>3</sub>Si ([M]<sup>+</sup>) 539.2752, Found 539.2757.

**2,3-Difluoro-*N*<sup>6</sup>,*N*<sup>6</sup>,*N*<sup>12</sup>,*N*<sup>12</sup>-tetramethyl-9,9-diphenyl-9*H*-tribenzo[*b,d,f*]silepine-6,12-diamine (3d)**

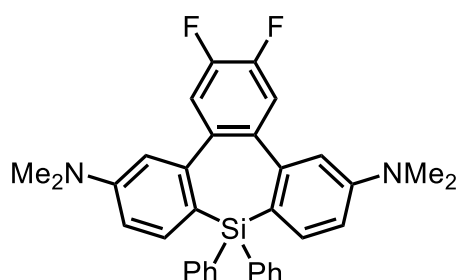

**3d** was obtained as a white solid (31 mg, 24%). <sup>1</sup>H NMR (600 MHz, CDCl<sub>3</sub>): δ 7.55–7.57 (m, 2H), 7.48–7.52 (m, 1H), 7.44–7.46 (m, 2H), 7.30 (d, *J* = 8.2 Hz, 2H), 7.18–7.21 (m, 3H), 7.01–7.09 (m, 4H), 6.74 (br, 2H), 6.65 (br, 2H), 2.97 (s, 12H); <sup>13</sup>C NMR (150 MHz, CDCl<sub>3</sub>): δ 151.5, 148.3 (dd, *J* = 250.0, 14.4 Hz), 146.7, 139.0, 137.8, 135.3, 135.0, 133.8, 132.4, 129.8, 129.0, 127.9, 127.1, 125.11, 120.13 (dd, *J* = 9.4, 7.9 Hz), 114.5 (d, *J* = 7.8 Hz), 110.6 (d, *J* = 5.6 Hz), 40.4; HRMS(EI<sup>+</sup>) Calcd for C<sub>34</sub>H<sub>30</sub>F<sub>2</sub>N<sub>2</sub>Si ([M]<sup>+</sup>) 532.2141, Found 532.2144.

**2,3-Dibromo-*N*<sup>6</sup>,*N*<sup>6</sup>,*N*<sup>12</sup>,*N*<sup>12</sup>-tetramethyl-9,9-diphenyl-9*H*-tribenzo[*b,d,f*]silepine-6,12-diamine (3e)**

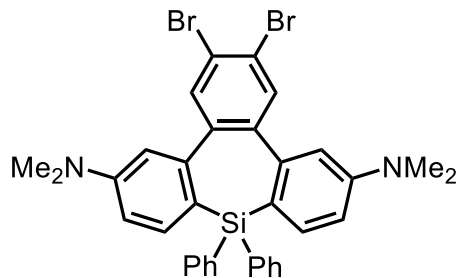

**3e** was obtained as a white solid (56 mg, 43%). <sup>1</sup>H NMR (400 MHz, CDCl<sub>3</sub>) δ 7.57 (dd, *J* = 8.0, 1.6 Hz, 2H), 7.48–7.54 (m, 2H), 7.42–7.46 (m, 2H), 7.41 (s, 2H), 7.26–7.28 (m, 2H), 7.15–7.20 (m, 2H), 7.06 (dd, *J* = 7.6, 7.6 Hz, 2H), 6.72 (d, *J* = 2.3 Hz, 2H), 6.63 (dd, *J* = 8.5, 2.5 Hz, 2H), 2.96 (s, 12H); <sup>13</sup>C NMR (100 MHz, CDCl<sub>3</sub>): δ 151.6, 146.2, 142.7, 137.8, 136.2, 135.4, 134.9, 133.6, 132.1, 129.9, 129.0, 128.0, 127.0, 125.4, 122.3, 114.2, 110.8, 40.4. HRMS(EI<sup>+</sup>) Calcd for C<sub>34</sub>H<sub>30</sub>Br<sub>2</sub>N<sub>2</sub>Si ([M]<sup>+</sup>) 652.0540, Found 652.0547.

***N*<sup>7</sup>,*N*<sup>7</sup>,*N*<sup>13</sup>,*N*<sup>13</sup>-Tetramethyl-10,10-diphenyl-10*H*-dibenzo[*b,f*]naphtho-[2,3-*d*]silepin-7,13-diamine (3f)**

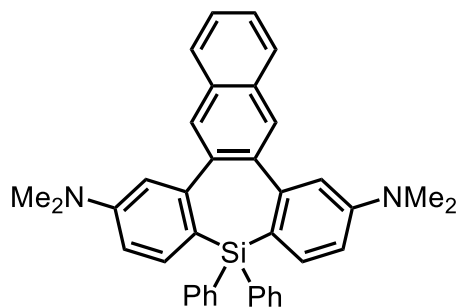

**3f** was obtained as a white solid (49 mg, 45%).  
<sup>1</sup>H NMR (400 MHz, CDCl<sub>3</sub>) δ 7.67–7.70 (m, 4H), 7.57 (dd, *J* = 8.0, 1.6 Hz, 2H), 7.42–7.49 (m, 3H), 7.37 (q, *J* = 3.2 Hz, 2H), 7.31 (d, *J* = 8.2 Hz, 2H), 7.16 (dd, *J* = 7.8, 1.4 Hz, 2H), 6.94 (d, *J* = 2.3 Hz, 2H), 6.77–6.84 (m, 3H), 6.64 (dd, *J* = 8.2, 2.7 Hz, 2H), 2.98 (s, 12H); <sup>13</sup>C NMR (100 MHz, CDCl<sub>3</sub>): δ 151.7, 148.9, 140.9, 137.9, 135.3, 134.9, 133.9, 132.9, 132.0, 130.7, 129.6, 128.4, 127.8, 127.4, 126.6, 125.8, 125.3, 115.3, 110.1, 40.5; HRMS(EI<sup>+</sup>) Calcd for C<sub>38</sub>H<sub>34</sub>N<sub>2</sub>Si ([M]<sup>+</sup>) 546.2486, Found 546.2492.

**9,9-Diethyl-*N*<sup>6</sup>,*N*<sup>6</sup>,*N*<sup>12</sup>,*N*<sup>12</sup>-tetramethyl-9*H*-tribenzo[*b,d,f*]silepin-6,12-diamine (3g)**

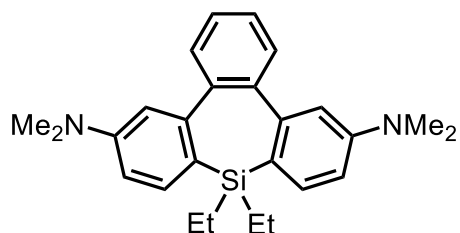

**3g** was obtained as a white solid (47 mg, 59%).  
<sup>1</sup>H NMR (400 MHz, CDCl<sub>3</sub>): δ 7.44–7.48 (m, 2H), 7.38–7.41 (m, 2H), 7.31 (d, *J* = 8.2 Hz, 2H), 6.77 (d, *J* = 2.3 Hz, 2H), 6.64 (dd, *J* = 8.2, 2.7 Hz, 2H), 2.93 (s, 12H), 1.28 (m, 5H), 0.59 (t, *J* = 8.0 Hz, 3H), 0.14 (q, *J* = 7.9 Hz, 2H); <sup>13</sup>C NMR (100 MHz, CDCl<sub>3</sub>): δ 151.2, 147.7, 142.4, 132.4, 131.7, 127.5, 127.0, 114.9, 110.6, 40.5, 8.1, 7.8, 2.5, 1.0; HRMS(EI<sup>+</sup>) Calcd for C<sub>26</sub>H<sub>32</sub>N<sub>2</sub>Si ([M]<sup>+</sup>) 400.2330, Found 400.2334.

***N*<sup>6</sup>,*N*<sup>6</sup>,*N*<sup>12</sup>,*N*<sup>12</sup>-Tetramethylspiro[dibenzo[*b,d*]silole-5,9'-tribenzo[*b,d,f*]silepin]-6',12'-diamine (3h)**

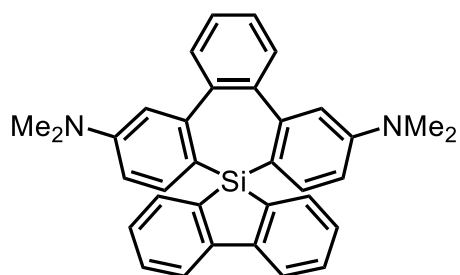

**3h** was obtained as a white solid (92 mg, 93%).  
<sup>1</sup>H NMR (400 MHz, CDCl<sub>3</sub>) δ 7.96 (d, *J* = 6.9 Hz, 1H), 7.91 (d, *J* = 7.8 Hz, 1H), 7.71 (d, *J* = 7.8 Hz, 1H), 7.55–7.64 (m, 5H), 7.46 (dd, *J* = 7.2, 7.2 Hz, 1H), 7.34 (d, *J* = 8.2 Hz, 2H), 7.18–7.22 (m, 1H), 6.88 (d, *J* = 2.1 Hz, 2H), 6.80 (dd, *J* = 7.4, 7.4 Hz, 1H), 6.56 (dd, *J* = 8.5, 2.5 Hz, 2H), 5.64 (d, *J* = 6.9 Hz, 1H), 2.93 (s, 12H); <sup>13</sup>C NMR (100 MHz, CDCl<sub>3</sub>): δ 151.9, 150.1, 148.0, 147.6, 142.3, 137.2, 135.6, 133.5, 133.3, 133.2, 133.0, 131.0, 130.0, 127.7, 127.6, 127.3, 125.0, 121.5, 120.6, 114.8, 110.7, 40.5. HRMS(EI<sup>+</sup>) Calcd for C<sub>34</sub>H<sub>30</sub>N<sub>2</sub>Si ([M]<sup>+</sup>) 494.2173, Found 494.2173.



**(*N*<sup>6</sup>,*N*<sup>6</sup>,*N*<sup>12</sup>,*N*<sup>12</sup>-Tetramethyl-9,9-diphenyl-9*H*-6,12-diamine) tribenzo[*b,d,f*]silepin (**5**)**

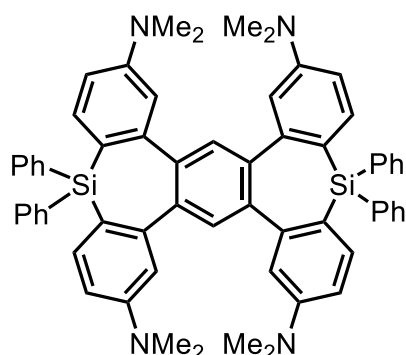

**5** was obtained as a white solid (78 mg, 85%, 0.10 mmol scale). <sup>1</sup>H NMR (400 MHz, CDCl<sub>3</sub>): δ 7.62 (dd, *J* = 7.8, 1.4 Hz, 4H), 7.44–7.50 (m, 6H), 7.27–7.30 (m, 8H), 6.99–7.05 (m, 6H), 6.84 (s, 2H), 6.59 (dd, *J* = 8.2, 2.7 Hz, 4H), 6.44 (d, *J* = 2.3 Hz, 4H), 2.94 (s, 24H); <sup>13</sup>C NMR (100 MHz, CDCl<sub>3</sub>): δ 151.4, 148.4, 140.0, 137.8, 135.7, 134.8, 134.3, 134.1, 132.7, 129.7, 128.5, 127.9, 126.4, 125.4, 114.6, 110.0, 40.4; HRMS(FAB<sup>+</sup>) Calcd for C<sub>62</sub>H<sub>58</sub>N<sub>4</sub>Si ([M+H]<sup>+</sup>)

915.4273, Found 915.4277.

**9,9-Diethyl-*N*<sup>6</sup>,*N*<sup>6</sup>,*N*<sup>6</sup>,*N*<sup>12</sup>,*N*<sup>12</sup>,*N*<sup>12</sup>-hexamethyl-9*H*-tribenzo[*b,d,f*]silepin-6,12-diaminium triflate (**6**)**

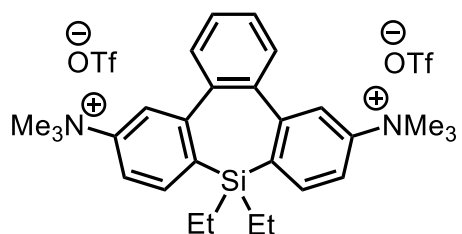

The compound **6** was prepared according to the procedure in the previous literature.<sup>10</sup> In a dry two neck round bottom flask equipped with a magnetic stir bar was charged the compound **3g** (200.3 mg, 0.50 mmol, 1.0 equiv) and CH<sub>2</sub>Cl<sub>2</sub> (5.0 mL). To the resultant stirring solution was added dropwise MeOTf (206 mg, 1.25 mmol, 2.5

equiv) at room temperature. The solution was stirred at room temperature for 2 h. The reaction mixture was concentrated to remove CH<sub>2</sub>Cl<sub>2</sub> and the residue was treated with Et<sub>2</sub>O (20 mL). The resultant solid was filtered, washed with Et<sub>2</sub>O and hexane, and then dried under vacuum to give silepin **6** as a white solid (333 mg, 91%). <sup>1</sup>H NMR (400 MHz, DMSO-*d*<sub>6</sub>): δ 7.88–7.92 (m, 4H), 7.60–7.69 (m, 6H), 3.59 (s, 18H), 1.45 (q, *J* = 7.8 Hz, 2H), 1.28 (t, *J* = 7.5 Hz, 3H), 0.52 (t, *J* = 8.0 Hz, 3H), 0.14 (q, *J* = 7.9 Hz, 2H); <sup>13</sup>C NMR (100 MHz, CDCl<sub>3</sub>): δ 148.6, 147.2, 141.3, 139.2, 133.4, 132.4, 128.8, 121.9, 120.8 (q, *J* = 321 Hz), 118.6, 56.4, 7.6, 7.1, 0.44, -0.07; HRMS(FAB<sup>+</sup>) Calcd for C<sub>29</sub>H<sub>38</sub>F<sub>3</sub>N<sub>2</sub>O<sub>3</sub>SSi<sup>+</sup> ([M-OTf<sup>-</sup>]<sup>+</sup>) 579.2319, Found 579.2326.

### 9,9-Diethyl-6,12-diphenyl-9H-tribenzo[*b,d,f*]silepin (7)

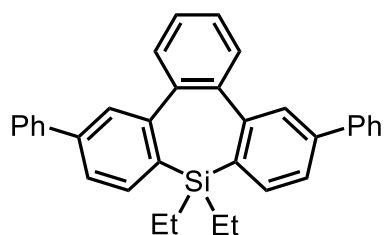

To a dry 20 mL Schlenk flask equipped with a magnetic stir bar was added the compound **6** (0.150 g, 0.20 mmol, 1.0 equiv) and PdCl<sub>2</sub>(PPh<sub>3</sub>)<sub>2</sub> (2.80 mg, 0.00400 mmol, 2.0 mol%). The flask was sealed with a rubber septum, evacuated/filled with nitrogen. THF (2.0 mL) was added via syringe, and the resultant slurry was stirred for 5 min at room temperature. Then phenylmagnesium bromide (0.5 M solution in THF, 0.88 mL, 0.440 mmol, 2.2 equiv) was added dropwise. After 1 h, the reaction mixture was quenched with water (1 mL) and 1N HCl (5 mL), and then extracted with Et<sub>2</sub>O. The organic extract was dried over MgSO<sub>4</sub>, filtered, and concentrated. The crude product was purified by chromatography on silica gel (eluent: hexane/ethyl acetate = 100:0 to 20:1) to give the compound **7** as white powder (82 mg, 88% yield). <sup>1</sup>H NMR (400 MHz, CDCl<sub>3</sub>): δ 7.66 (d, *J* = 1.8 Hz, 2H), 7.57–7.60 (m, 6H), 7.49–7.53 (m, 4H), 7.40–7.48 (m, 6H), 7.31–7.35 (m, 2H), 1.37–1.46 (m, 5H), 0.65 (t, *J* = 7.8 Hz, 3H), 0.27 (q, *J* = 7.9 Hz, 2H); <sup>13</sup>C NMR (100 MHz, CDCl<sub>3</sub>): δ 147.1, 142.2, 141.5, 141.1, 139.1, 132.2, 131.9, 129.2, 128.9, 127.5, 127.3, 125.2, 8.1, 7.6, 1.6, 1.0 (one carbon is missing); HRMS(EI<sup>+</sup>) Calcd for C<sub>34</sub>H<sub>30</sub>Si ([M]<sup>+</sup>) 466.2112, Found 466.2118.

### 2,3-Bis(3-methoxyphenyl)-*N*<sup>6</sup>,*N*<sup>6</sup>,*N*<sup>12</sup>,*N*<sup>12</sup>-tetramethyl-9,9-diphenyl-9H-tribenzo[*b,d,f*]silepin-6,12-diamine (8)

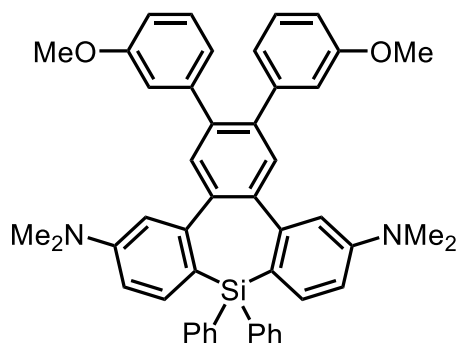

Compound **8** was synthesized by Suzuki-Miyaura coupling reaction. A mixture of **3e** (156.0 mg, 0.24 mmol, 1.0 equiv), (3-methoxyphenyl)boronic acid (110 mg, 0.72 mmol, 3.0 equiv), Na<sub>2</sub>CO<sub>3</sub> (127 mg, 1.2 mmol, 5.0 equiv) and Pd(PPh<sub>3</sub>)<sub>4</sub> (14.0 mg, 0.012 mmol, 5.0 mol%) in a mixture of toluene (3 mL), water (0.75 mL) and ethanol (0.75 mL) was heated to 80 °C under nitrogen. After the completion of the reaction monitored by TLC, the mixture was cooled to room temperature, then diluted with water and EtOAc. The aqueous layer was extracted with EtOAc (3 × 20 mL). The combined organic phases were dried over Na<sub>2</sub>SO<sub>4</sub> and concentrated under reduced pressure. The crude product was then purified further by column chromatography (eluent: hexane/ethyl acetate = 10:1) on silica gel to give **8** (142 mg, 84%) as white solid. <sup>1</sup>H NMR (400 MHz, CDCl<sub>3</sub>): δ 7.62–7.64 (m, 2H), 7.45–7.53 (m, 3H), 7.34 (d, *J* = 6.9 Hz, 2H), 7.08–7.22 (m, 8H), 7.03 (dd, *J* = 7.2, 7.2 Hz, 2H), 6.90 (s, 1H), 6.60–6.74 (m, 6H), 6.48–6.51 (m, 2H), 3.63 (s, 6H), 2.96 (s, 12H); <sup>13</sup>C NMR (100 MHz, CDCl<sub>3</sub>): δ 159.1, 151.7, 148.0, 142.7, 141.4, 138.4, 137.8, 135.6, 134.5, 133.8, 132.5, 129.7, 128.8, 128.3, 127.9, 126.8, 125.74, 125.65, 122.3, 115.2, 114.4, 112.5, 110.4, 55.2, 40.4; HRMS(EI<sup>+</sup>) Calcd for C<sub>48</sub>H<sub>44</sub>N<sub>2</sub>O<sub>2</sub>Si ([M]<sup>+</sup>) 708.3167, Found 708.3171.

**3,17-Dimethoxy-*N*<sup>7</sup>,*N*<sup>7</sup>,*N*<sup>13</sup>,*N*<sup>13</sup>-tetramethyl-10,10-diphenyl-10*H*-dibenzo[*b,f*]triphenylene[2,3-*d*]silepin-7,13-diamine (9)**

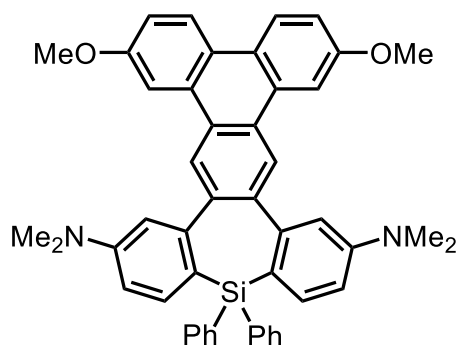

Compound **9** was synthesized according to the reported procedure.<sup>12</sup> Silepin **8** (142 mg, 0.2 mmol, 1.0 equiv) was dissolved in dry dichloromethane (6.0 mL) and cooled to 0 °C in an ice/water bath under a nitrogen atmosphere. A solution of iron(III) chloride (250 mg, 1.54 mmol, 8.0 equiv) in nitromethane (1.0 mL) was added dropwise to the above solution at 0 °C and the mixture was stirred for 3 h at room temperature.

To the resulting mixture was added methanol (10 mL) followed by water (10 mL) and dichloromethane (20 mL). The organic layer was separated and dried over anhydrous Na<sub>2</sub>SO<sub>4</sub> and evaporated to produce a brown oil. The purification of the crude product by column chromatography using hexanes as eluent afforded **9** (122.8 mg, 88%) as white solid. <sup>1</sup>H NMR (400 MHz, CD<sub>2</sub>Cl<sub>2</sub>): δ 8.44 (d, *J* = 8.7 Hz, 2H), 8.38 (s, 2H), 7.95 (d, *J* = 2.7 Hz, 2H), 7.44–7.57 (m, 5H), 7.32–7.35 (m, 3H), 7.19–7.26 (m, 4H), 7.02 (s, 1H), 6.74–6.84 (m, 5H), 3.98 (s, 6H), 3.02 (s, 12H); <sup>13</sup>C NMR (100 MHz, CD<sub>2</sub>Cl<sub>2</sub>): δ 158.7, 152.0, 148.8, 141.6, 138.1, 135.5, 135.1, 134.1, 132.8, 130.12, 130.06, 128.9, 128.6, 128.2, 127.1, 126.8, 124.7, 124.2, 116.2, 115.6, 110.7, 106.2, 55.9, 40.7 (one carbon is missing); HRMS(EI<sup>+</sup>) Calcd for C<sub>48</sub>H<sub>42</sub>N<sub>2</sub>O<sub>2</sub>Si ([M]<sup>+</sup>) 706.3011, Found 706.3018.

#### 4. Variable Temperature $^1\text{H}$ NMR of **3g**

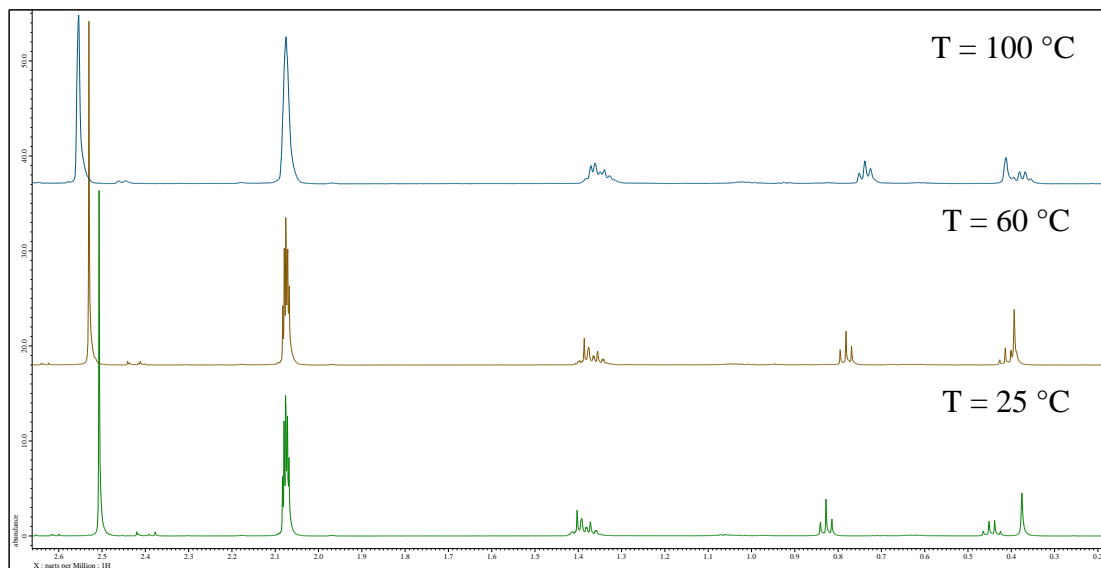

**Figure S1.** Variable Temperature  $^1\text{H}$  NMR of **3g** in  $\text{toluene-}d_8$ .

The two ethyl groups of **3g** appeared independently in the  $^1\text{H}$  NMR spectra at 25, 60, and 100 °C in  $\text{toluene-}d_8$ , even though the shift of peaks was observed.

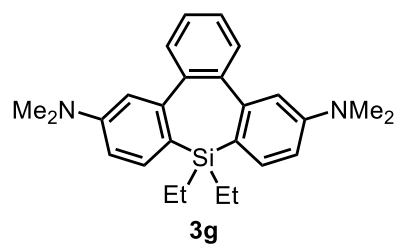

## 5. Optical Properties of 3a, 3f, 5, 9

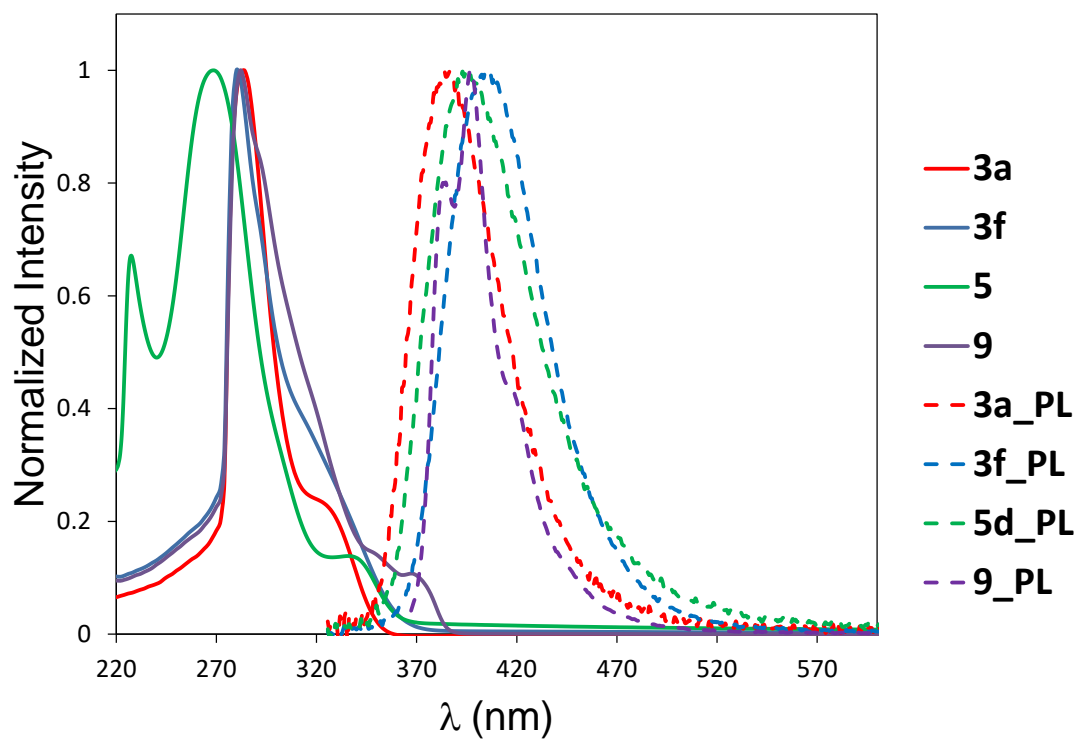

**Figure S2.** UV absorption (solid line) and photoluminescence (dot line) spectra of **3a**, **3f**, **5**, and **9** in toluene ( $5.0 \times 10^{-5}$  M).

## 6. X-ray structures of compounds 3a, 5, 9

### 6-1. X-ray Structure of compound 3a

A single crystal of  $N^6, N^6, N^{12}, N^{12}$ -tetramethyl-9,9-diphenyl-9*H*-tribenzo[*b,d,f*]silepin-6,12-diamine ( $C_{34}H_{32}N_2Si$ ) (**3a**) was prepared by recrystallization from the dichloromethane/ethanol solution. A suitable crystal was selected, and the X-ray diffraction was collected on an Rigaku AFC HyPix-6000 diffractometer: fixed-chi single diffractometer with graphite monochromated Mo- $K\alpha$  radiation ( $\lambda = 0.71073\text{\AA}$ ). The crystal was kept at 123 K during data collection. The data were collected using  $\omega$  scan in the  $\theta$  range of  $5.182 \leq \theta \leq 54.964$  deg. The data were corrected for Lorentz and polarization effects. The structures were solved by direct methods,<sup>13</sup> and expanded using Fourier techniques.<sup>14</sup> Hydrogen atoms were refined using the riding model. The final cycle of full-matrix least-squares refinement on  $F^2$  was based on 12122 observed reflections. Neutral atom scattering factors were taken from Cromer and Waber.<sup>15</sup> All calculations were performed using the Olex-2 crystallographic software package except for refinement,<sup>16</sup> which was performed using version 2018/3 of ShelXL (Sheldrick, 2015) of final refinement as well as the bond lengths and angles are summarized in the supporting information, and the numbering scheme employed is also shown in the supporting information, which were drawn with ORTEP at 50% probability ellipsoid.

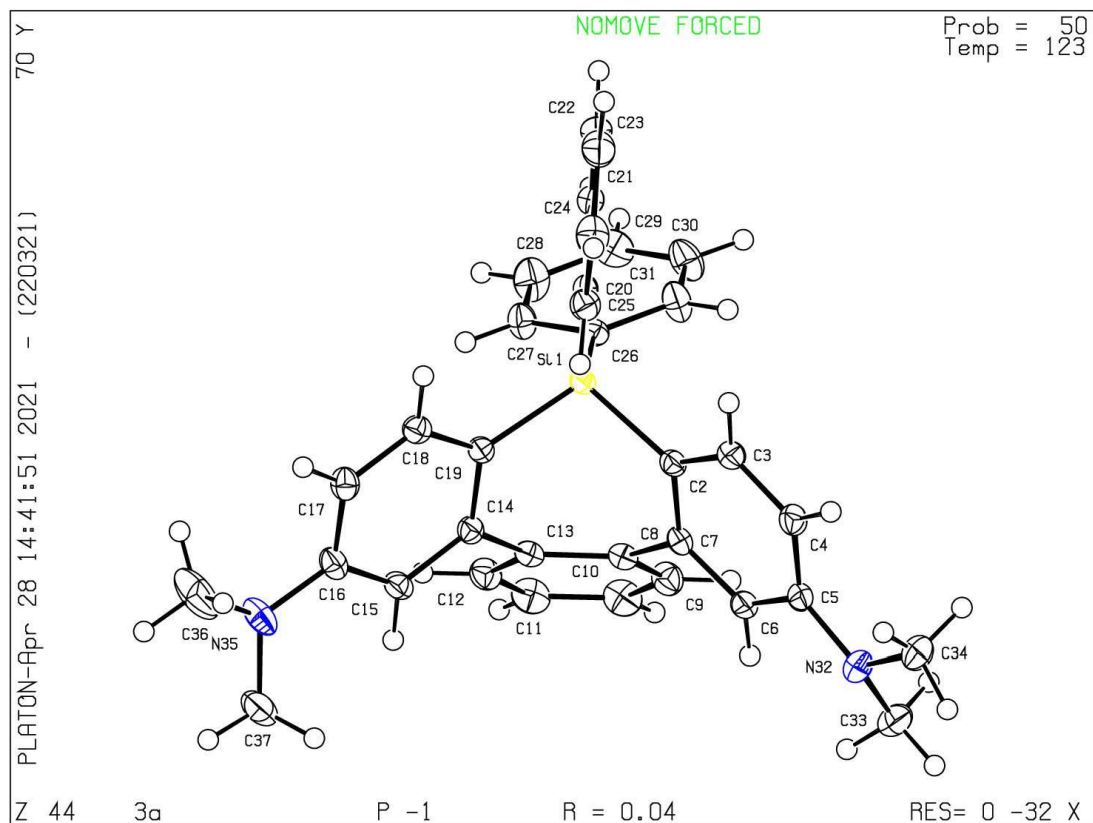

### Crystal structure determination of **3a**

$C_{34}H_{32}N_2Si$  ( $M = 496.70$  g/mol): triclinic, space group P-1 (no. 2),  $a = 9.8113(2)$  Å,  $b = 12.0833(4)$  Å,  $c = 12.1527(3)$  Å,  $\alpha = 82.005(2)^\circ$ ,  $\beta = 82.769(2)^\circ$ ,  $\gamma = 71.726(3)^\circ$ ,  $V = 1349.59(7)$  Å<sup>3</sup>,  $Z = 2$ ,  $T = 123$  K,  $\mu(\text{Mo K}\alpha) = 0.113$  mm<sup>-1</sup>,  $D_{\text{calc}} = 1.222$  g/cm<sup>3</sup>, 20753 reflections measured ( $5.182^\circ \leq 2\theta \leq 54.964^\circ$ ), 6188 unique ( $R_{\text{int}} = 0.0182$ ,  $R_{\text{sigma}} = 0.0186$ ) which were used in all calculations. The final  $R_1$  was 0.0353 ( $I > 2\sigma(I)$ ) and  $wR_2$  was 0.0950 (all data).

**Table S1.** Crystal data and structure refinement for **3a**

|                                               |                                                                    |
|-----------------------------------------------|--------------------------------------------------------------------|
| Empirical formula                             | $C_{34}H_{32}N_2Si$                                                |
| Formula weight                                | 496.70                                                             |
| Temperature/K                                 | 123                                                                |
| Crystal system                                | triclinic                                                          |
| Space group                                   | P-1                                                                |
| $a/\text{\AA}$                                | 9.8113(2)                                                          |
| $b/\text{\AA}$                                | 12.0833(4)                                                         |
| $c/\text{\AA}$                                | 12.1527(3)                                                         |
| $\alpha/^\circ$                               | 82.005(2)                                                          |
| $\beta/^\circ$                                | 82.769(2)                                                          |
| $\gamma/^\circ$                               | 71.726(3)                                                          |
| Volume/Å <sup>3</sup>                         | 1349.59(7)                                                         |
| $Z$                                           | 2                                                                  |
| $\rho_{\text{calc}}/\text{g/cm}^3$            | 1.222                                                              |
| $\mu/\text{mm}^{-1}$                          | 0.113                                                              |
| $F(000)$                                      | 528.0                                                              |
| Crystal size/mm <sup>3</sup>                  | $0.5 \times 0.4 \times 0.4$                                        |
| Radiation                                     | Mo K $\alpha$ ( $\lambda = 0.71073$ )                              |
| $2\theta$ range for data collection/ $^\circ$ | 5.182 to 54.964                                                    |
| Index ranges                                  | $-12 \leq h \leq 12$ , $-15 \leq k \leq 14$ , $-15 \leq l \leq 15$ |
| Reflections collected                         | 20753                                                              |
| Independent reflections                       | 6188 [ $R_{\text{int}} = 0.0182$ , $R_{\text{sigma}} = 0.0186$ ]   |
| Data/restraints/parameters                    | 6188/0/338                                                         |
| Goodness-of-fit on $F^2$                      | 1.046                                                              |
| Final R indexes [ $I \geq 2\sigma(I)$ ]       | $R_1 = 0.0353$ , $wR_2 = 0.0929$                                   |
| Final R indexes [all data]                    | $R_1 = 0.0386$ , $wR_2 = 0.0950$                                   |

Largest diff. peak/hole / e Å<sup>-3</sup> 0.38/-0.28

**Table S2.** Fractional Atomic Coordinates ( $\times 10^4$ ) and Equivalent Isotropic Displacement Parameters ( $\text{Å}^2 \times 10^3$ ) for **3a**.  $U_{eq}$  is defined as 1/3 of the trace of the orthogonalised  $U_{ij}$  tensor.

| Atom | x           | y           | z           | $U_{eq}$ |
|------|-------------|-------------|-------------|----------|
| Si1  | 6746.1(3)   | 4082.5(2)   | 3022.0(2)   | 15.30(8) |
| N32  | 11465.1(11) | 1937.6(9)   | -515.6(9)   | 26.6(2)  |
| N35  | 8314.5(13)  | -68.4(9)    | 6567.6(9)   | 30.0(2)  |
| C20  | 7029.9(12)  | 5405.3(9)   | 3484.1(9)   | 17.8(2)  |
| C26  | 4883.4(11)  | 4513.4(9)   | 2574.3(9)   | 17.9(2)  |
| C7   | 8141.1(12)  | 2482.0(9)   | 1431.8(9)   | 17.7(2)  |
| C8   | 7011.7(12)  | 1886.3(9)   | 1781.1(9)   | 18.8(2)  |
| C3   | 9206.9(12)  | 4003.2(10)  | 1450.1(9)   | 20.3(2)  |
| C19  | 7128.2(11)  | 2837.7(9)   | 4133.0(9)   | 16.5(2)  |
| C2   | 8114.9(11)  | 3511.9(9)   | 1865.8(9)   | 17.4(2)  |
| C14  | 7166.2(11)  | 1711.9(9)   | 3916.4(9)   | 17.6(2)  |
| C18  | 7532.4(12)  | 2941.6(10)  | 5166.1(9)   | 19.4(2)  |
| C25  | 8366.9(13)  | 5387.4(10)  | 3786.8(10)  | 22.4(2)  |
| C13  | 6603.6(12)  | 1516.7(9)   | 2893.4(9)   | 18.5(2)  |
| C5   | 10334.4(12) | 2493.6(10)  | 228.9(9)    | 20.7(2)  |
| C16  | 7975.8(12)  | 874.7(10)   | 5762.2(10)  | 21.5(2)  |
| C6   | 9214.0(12)  | 2010.9(10)  | 609.5(9)    | 19.8(2)  |
| C12  | 5566.1(13)  | 921.9(10)   | 3079.1(10)  | 23.7(2)  |
| C15  | 7597.7(12)  | 755.1(10)   | 4718.0(9)   | 20.2(2)  |
| C17  | 7945.3(12)  | 1998.9(10)  | 5967.5(9)   | 21.8(2)  |
| C9   | 6348.0(13)  | 1646.5(11)  | 923.6(10)   | 24.9(2)  |
| C27  | 3764.2(13)  | 4231.7(11)  | 3251.6(10)  | 24.2(2)  |
| C4   | 10303.8(12) | 3515.1(10)  | 662.0(9)    | 21.9(2)  |
| C21  | 5911.2(13)  | 6460.5(10)  | 3508.5(9)   | 21.5(2)  |
| C11  | 4931.1(14)  | 692.6(11)   | 2219.5(11)  | 28.3(3)  |
| C31  | 4559.1(14)  | 5186.6(12)  | 1556.7(11)  | 29.1(3)  |
| C24  | 8587.4(15)  | 6390.4(12)  | 4066.4(10)  | 29.2(3)  |
| C30  | 3164.7(15)  | 5577.2(12)  | 1236.7(11)  | 33.2(3)  |
| C22  | 6119.5(15)  | 7460.8(11)  | 3808.1(10)  | 28.8(3)  |
| C29  | 2068.0(14)  | 5302.7(12)  | 1931.0(12)  | 30.9(3)  |
| C10  | 5323.4(14)  | 1063.3(11)  | 1131.7(11)  | 29.3(3)  |
| C34  | 12557.5(14) | 2507.1(12)  | -920.4(11)  | 30.7(3)  |
| C23  | 7459.8(17)  | 7424.0(12)  | 4069.9(11)  | 32.7(3)  |
| C37  | 8686.9(16)  | -1254.7(11) | 6268.7(12)  | 33.8(3)  |
| C33  | 11149.0(16) | 1297.2(12)  | -1324.4(11) | 34.4(3)  |



| Atom | x          | y          | z          | $U_{eq}$ |
|------|------------|------------|------------|----------|
| C28  | 2369.8(14) | 4620.0(13) | 2931.6(12) | 32.8(3)  |
| C36  | 8741(2)    | 73.1(15)   | 7609.9(14) | 52.4(5)  |

**Table S3.** Anisotropic Displacement Parameters ( $\times 10^4$ ) for **3a**. The anisotropic displacement factor exponent takes the form:  $-2p^2[h^2a^{*2} \times U_{11} + \dots + 2hka^* \times b^* \times U_{12}]$

| Atom | $U_{11}$  | $U_{22}$  | $U_{33}$  | $U_{23}$ | $U_{13}$  | $U_{12}$  |
|------|-----------|-----------|-----------|----------|-----------|-----------|
| Si1  | 13.78(14) | 13.97(14) | 17.33(14) | 0.08(10) | -0.89(10) | -3.94(11) |
| N32  | 27.4(5)   | 26.1(5)   | 23.0(5)   | -4.2(4)  | 6.6(4)    | -5.9(4)   |
| N35  | 36.4(6)   | 24.3(5)   | 29.0(5)   | 9.5(4)   | -13.3(5)  | -9.9(5)   |
| C20  | 19.3(5)   | 17.2(5)   | 16.6(5)   | -0.7(4)  | 1.7(4)    | -6.8(4)   |
| C26  | 16.4(5)   | 16.7(5)   | 20.0(5)   | -1.1(4)  | -2.5(4)   | -4.3(4)   |
| C7   | 19.1(5)   | 17.0(5)   | 16.1(5)   | 2.2(4)   | -4.2(4)   | -4.7(4)   |
| C8   | 19.5(5)   | 15.2(5)   | 21.2(5)   | -1.1(4)  | -3.3(4)   | -4.5(4)   |
| C3   | 21.7(5)   | 17.7(5)   | 21.0(5)   | -1.0(4)  | -0.3(4)   | -6.4(4)   |
| C19  | 13.2(5)   | 16.6(5)   | 18.2(5)   | 0.2(4)   | -0.4(4)   | -3.6(4)   |
| C2   | 16.9(5)   | 15.9(5)   | 17.7(5)   | 1.0(4)   | -2.0(4)   | -3.5(4)   |
| C14  | 15.3(5)   | 18.2(5)   | 18.4(5)   | -0.4(4)  | 0.2(4)    | -5.2(4)   |
| C18  | 17.7(5)   | 19.1(5)   | 21.2(5)   | -2.0(4)  | -1.0(4)   | -5.5(4)   |
| C25  | 21.9(5)   | 22.9(6)   | 23.1(5)   | -1.4(4)  | -1.5(4)   | -8.3(4)   |
| C13  | 18.3(5)   | 14.7(5)   | 22.0(5)   | -0.9(4)  | -2.4(4)   | -4.3(4)   |
| C5   | 21.8(5)   | 19.3(5)   | 16.6(5)   | 1.6(4)   | -0.1(4)   | -1.8(4)   |
| C16  | 18.2(5)   | 21.9(5)   | 22.4(5)   | 4.7(4)   | -3.4(4)   | -5.7(4)   |
| C6   | 24.4(5)   | 16.8(5)   | 17.2(5)   | -0.5(4)  | -2.9(4)   | -4.7(4)   |
| C12  | 23.0(6)   | 22.0(6)   | 27.2(6)   | -0.8(4)  | -0.9(4)   | -9.6(5)   |
| C15  | 20.4(5)   | 16.1(5)   | 23.2(5)   | 0.9(4)   | -1.0(4)   | -6.0(4)   |
| C17  | 20.8(5)   | 25.7(6)   | 18.9(5)   | 0.1(4)   | -4.3(4)   | -7.4(4)   |
| C9   | 29.3(6)   | 24.5(6)   | 22.5(5)   | -0.9(4)  | -6.2(5)   | -9.5(5)   |
| C27  | 20.3(5)   | 29.7(6)   | 21.8(5)   | 3.2(5)   | -2.7(4)   | -8.8(5)   |
| C4   | 20.8(5)   | 22.1(5)   | 22.0(5)   | 0.7(4)   | 1.7(4)    | -7.9(4)   |
| C21  | 23.1(5)   | 19.8(5)   | 19.2(5)   | -1.1(4)  | 2.8(4)    | -5.2(4)   |
| C11  | 25.3(6)   | 26.7(6)   | 37.9(7)   | -3.3(5)  | -4.9(5)   | -14.1(5)  |
| C31  | 24.5(6)   | 34.9(7)   | 26.1(6)   | 9.4(5)   | -4.5(5)   | -10.8(5)  |
| C24  | 35.2(7)   | 34.9(7)   | 25.3(6)   | -2.5(5)  | -3.4(5)   | -21.6(6)  |
| C30  | 31.5(7)   | 35.0(7)   | 30.8(7)   | 10.6(5)  | -14.6(5)  | -8.1(6)   |
| C22  | 39.7(7)   | 18.1(5)   | 25.0(6)   | -4.3(4)  | 4.2(5)    | -5.2(5)   |
| C29  | 20.6(6)   | 33.2(7)   | 39.5(7)   | -0.2(5)  | -13.0(5)  | -6.5(5)   |
| C10  | 31.6(7)   | 29.0(6)   | 32.3(6)   | -4.1(5)  | -11.5(5)  | -12.7(5)  |
| C34  | 25.7(6)   | 31.7(7)   | 28.7(6)   | -2.4(5)  | 8.2(5)    | -4.5(5)   |
| C23  | 53.9(8)   | 25.0(6)   | 25.8(6)   | -5.8(5)  | 0.6(6)    | -21.6(6)  |
| C37  | 35.1(7)   | 23.2(6)   | 37.9(7)   | 8.4(5)   | -5.1(6)   | -5.6(5)   |

| Atom | $U_{11}$ | $U_{22}$ | $U_{33}$ | $U_{23}$ | $U_{13}$ | $U_{12}$ |
|------|----------|----------|----------|----------|----------|----------|
| C33  | 43.6(8)  | 27.2(6)  | 30.2(7)  | -9.9(5)  | 10.0(6)  | -9.7(6)  |
| C28  | 19.5(6)  | 45.0(8)  | 35.0(7)  | 2.6(6)   | -2.7(5)  | -14.0(6) |
| C36  | 82.5(13) | 39.8(8)  | 42.2(9)  | 17.3(7)  | -40.1(9) | -24.8(9) |

**Table S4.** Bond Lengths in Å for **3a**.

| Atom | Atom | Length/Å   | Atom | Atom | Length/Å   |
|------|------|------------|------|------|------------|
| Si1  | C20  | 1.8749(11) | C19  | C14  | 1.4095(15) |
| Si1  | C26  | 1.8660(11) | C19  | C18  | 1.3964(15) |
| Si1  | C19  | 1.8534(11) | C14  | C13  | 1.4972(15) |
| Si1  | C2   | 1.8620(11) | C14  | C15  | 1.3959(15) |
| N32  | C5   | 1.3963(14) | C18  | C17  | 1.3825(16) |
| N32  | C34  | 1.4492(17) | C25  | C24  | 1.3887(17) |
| N32  | C33  | 1.4491(17) | C13  | C12  | 1.3999(16) |
| N35  | C16  | 1.3788(15) | C5   | C6   | 1.4005(16) |
| N35  | C37  | 1.4503(18) | C5   | C4   | 1.3982(16) |
| N35  | C36  | 1.4308(18) | C16  | C15  | 1.4042(16) |
| C20  | C25  | 1.3994(16) | C16  | C17  | 1.4055(17) |
| C20  | C21  | 1.3986(15) | C12  | C11  | 1.3815(17) |
| C26  | C27  | 1.3885(16) | C9   | C10  | 1.3790(18) |
| C26  | C31  | 1.3961(16) | C27  | C28  | 1.3870(17) |
| C7   | C8   | 1.4909(15) | C21  | C22  | 1.3898(17) |
| C7   | C2   | 1.4095(15) | C11  | C10  | 1.3827(19) |
| C7   | C6   | 1.3959(15) | C31  | C30  | 1.3870(18) |
| C8   | C13  | 1.4124(15) | C24  | C23  | 1.385(2)   |
| C8   | C9   | 1.4025(16) | C30  | C29  | 1.377(2)   |
| C3   | C2   | 1.3909(15) | C22  | C23  | 1.377(2)   |
| C3   | C4   | 1.3867(16) | C29  | C28  | 1.3803(19) |

**Table S5.** Bond Angles in ° for **3a**.

| Atom | Atom | Atom | Angle/°   | Atom | Atom | Atom | Angle/°    |
|------|------|------|-----------|------|------|------|------------|
| C26  | Si1  | C20  | 108.00(5) | C19  | C14  | C13  | 121.94(9)  |
| C19  | Si1  | C20  | 110.70(5) | C15  | C14  | C19  | 120.09(10) |
| C19  | Si1  | C26  | 113.96(5) | C15  | C14  | C13  | 117.63(10) |
| C19  | Si1  | C2   | 102.46(5) | C17  | C18  | C19  | 122.79(10) |
| C2   | Si1  | C20  | 110.54(5) | C24  | C25  | C20  | 121.20(11) |

| Atom Atom Atom Angle/° |     |     |            | Atom Atom Atom Angle/° |     |     |            |
|------------------------|-----|-----|------------|------------------------|-----|-----|------------|
| C2                     | Si1 | C26 | 111.14(5)  | C8                     | C13 | C14 | 126.09(10) |
| C5                     | N32 | C34 | 118.13(10) | C12                    | C13 | C8  | 118.14(10) |
| C5                     | N32 | C33 | 117.96(11) | C12                    | C13 | C14 | 115.76(10) |
| C34                    | N32 | C33 | 114.26(10) | N32                    | C5  | C6  | 120.66(11) |
| C16                    | N35 | C37 | 120.39(11) | N32                    | C5  | C4  | 121.87(11) |
| C16                    | N35 | C36 | 119.76(11) | C4                     | C5  | C6  | 117.41(10) |
| C36                    | N35 | C37 | 117.02(11) | N35                    | C16 | C15 | 121.11(11) |
| C25                    | C20 | Si1 | 121.70(8)  | N35                    | C16 | C17 | 121.39(11) |
| C21                    | C20 | Si1 | 120.73(9)  | C15                    | C16 | C17 | 117.46(10) |
| C21                    | C20 | C25 | 117.55(10) | C7                     | C6  | C5  | 122.13(10) |
| C27                    | C26 | Si1 | 121.89(8)  | C11                    | C12 | C13 | 122.47(11) |
| C27                    | C26 | C31 | 117.73(10) | C14                    | C15 | C16 | 122.03(10) |
| C31                    | C26 | Si1 | 120.31(9)  | C18                    | C17 | C16 | 120.28(11) |
| C2                     | C7  | C8  | 122.35(10) | C10                    | C9  | C8  | 122.30(11) |
| C6                     | C7  | C8  | 117.43(10) | C28                    | C27 | C26 | 120.97(11) |
| C6                     | C7  | C2  | 120.17(10) | C3                     | C4  | C5  | 120.19(11) |
| C13                    | C8  | C7  | 125.16(10) | C22                    | C21 | C20 | 121.43(12) |
| C9                     | C8  | C7  | 116.51(10) | C12                    | C11 | C10 | 119.31(11) |
| C9                     | C8  | C13 | 118.30(10) | C30                    | C31 | C26 | 121.35(11) |
| C4                     | C3  | C2  | 123.11(11) | C23                    | C24 | C25 | 119.69(12) |
| C14                    | C19 | Si1 | 120.37(8)  | C29                    | C30 | C31 | 119.86(12) |
| C18                    | C19 | Si1 | 121.97(8)  | C23                    | C22 | C21 | 119.62(12) |
| C18                    | C19 | C14 | 117.33(10) | C30                    | C29 | C28 | 119.72(11) |
| C7                     | C2  | Si1 | 119.79(8)  | C9                     | C10 | C11 | 119.48(11) |
| C3                     | C2  | Si1 | 123.12(8)  | C22                    | C23 | C24 | 120.46(12) |
| C3                     | C2  | C7  | 116.90(10) | C29                    | C28 | C27 | 120.35(12) |

**Table S6.** Hydrogen Fractional Atomic Coordinates ( $\times 10^4$ ) and Equivalent Isotropic Displacement Parameters ( $\text{\AA}^2 \times 10^3$ ) for **3a**.  $U_{eq}$  is defined as 1/3 of the trace of the orthogonalised  $U_{ij}$ .

| Atom | x       | y       | z       | $U_{eq}$ |
|------|---------|---------|---------|----------|
| H3   | 9200.95 | 4706.5  | 1718.87 | 24       |
| H18  | 7523.37 | 3691.84 | 5325.11 | 23       |
| H25  | 9137.88 | 4676.2  | 3801.25 | 27       |

| Atom | x        | y        | z        | $U_{eq}$ |
|------|----------|----------|----------|----------|
| H6   | 9183.29  | 1341.19  | 297.92   | 24       |
| H12  | 5288.16  | 666.27   | 3824.19  | 28       |
| H15  | 7636.83  | -0.3     | 4552.04  | 24       |
| H17  | 8209.49  | 2111.52  | 6659.83  | 26       |
| H9   | 6613.57  | 1894.49  | 173.21   | 30       |
| H27  | 3956.41  | 3766.04  | 3944.31  | 29       |
| H4   | 11036.64 | 3875.75  | 415.71   | 26       |
| H21  | 4988.93  | 6494.24  | 3316.18  | 26       |
| H11  | 4232.26  | 284.48   | 2374.26  | 34       |
| H31  | 5308.94  | 5381.13  | 1073.6   | 35       |
| H24  | 9507.53  | 6367.58  | 4254.32  | 35       |
| H30  | 2966.37  | 6033.07  | 540.11   | 40       |
| H22  | 5341.98  | 8165.96  | 3832.21  | 35       |
| H29  | 1108.05  | 5582     | 1722.13  | 37       |
| H10  | 4890.54  | 917.43   | 532.39   | 35       |
| H34A | 12137.35 | 3220.33  | -1408.03 | 46       |
| H34B | 13352.48 | 1973.73  | -1340.48 | 46       |
| H34C | 12921.35 | 2712.44  | -286.53  | 46       |
| H23  | 7611.67  | 8112.52  | 4254.17  | 39       |
| H37A | 7821.38  | -1403.79 | 6082.64  | 51       |
| H37B | 9087.39  | -1811.08 | 6899.26  | 51       |
| H37C | 9403.74  | -1350.86 | 5622.21  | 51       |
| H33A | 10783.27 | 667.66   | -933.96  | 52       |
| H33B | 12029.83 | 959.25   | -1795.32 | 52       |
| H33C | 10420.04 | 1831.6   | -1790.82 | 52       |
| H28  | 1618.32  | 4415     | 3403.61  | 39       |
| H36A | 9695.99  | 188.35   | 7492.92  | 79       |
| H36B | 8776.52  | -629.15  | 8131.4   | 79       |
| H36C | 8042.37  | 757.1    | 7919.15  | 79       |

## 6-2. X-ray structure of compound 5

A single crystal of ( $N^6, N^6, N^{12}, N^{12}$ -tetramethyl-9,9-diphenyl-9*H*-6,12-diamine) tribenzo[*b,d,f*]bissilepin ( $C_{62}H_{58}N_4Si_2$ ) (**5**) was prepared by recrystallization from the dichloromethane/ethanol solution. A suitable crystal was selected, and the X-ray diffraction was collected on an Rigaku AFC HyPix-6000 diffractometer: fixed-chi single diffractometer with graphite monochromated Mo- $K\alpha$  radiation ( $\lambda = 0.71073\text{\AA}$ ). The crystal was kept at 173 K during data collection. The data were collected using  $\omega$  scan in the  $\theta$  range of  $4.476 \leq \theta \leq 54.966$  deg. The data were corrected for Lorentz and polarization effects. The structures were solved by direct methods,<sup>13</sup> and expanded using Fourier techniques.<sup>14</sup> Hydrogen atoms were refined using the riding model. The final cycle of full-matrix least-squares refinement on  $F^2$  was based on 26837 observed

reflections. Neutral atom scattering factors were taken from Cromer and Waber.<sup>15</sup> All calculations were performed using the Olex-2 crystallographic software package except for refinement,<sup>16</sup> which was performed using version 2018/3 of ShelXL (Sheldrick, 2015) of final refinement as well as the bond lengths and angles are summarized in the supporting information, and the numbering scheme employed is also shown in the supporting information, which were drawn with ORTEP at 50% probability ellipsoid.

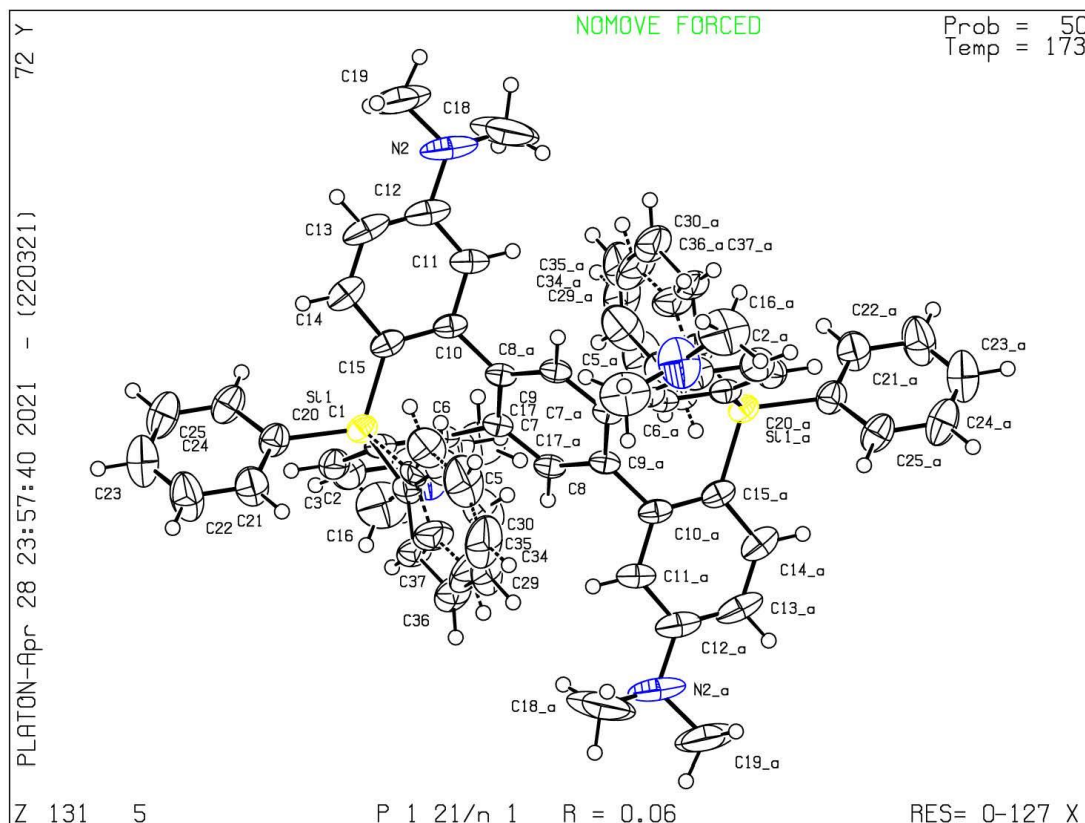

**Table S7.** Crystal data and structure refinement for **5**

|                   |                       |
|-------------------|-----------------------|
| Empirical formula | $C_{62}H_{58}N_4Si_2$ |
| Formula weight    | 915.30                |
| Temperature/K     | 173                   |
| Crystal system    | monoclinic            |
| Space group       | $P2_1/n$              |
| $a/\text{\AA}$    | 15.3334(8)            |
| $b/\text{\AA}$    | 11.1613(8)            |
| $c/\text{\AA}$    | 15.7358(9)            |
| $\alpha/^\circ$   | 90                    |
| $\beta/^\circ$    | 91.890(5)             |
| $\gamma/^\circ$   | 90                    |

|                                             |                                                               |
|---------------------------------------------|---------------------------------------------------------------|
| Volume/Å <sup>3</sup>                       | 2691.6(3)                                                     |
| Z                                           | 50                                                            |
| ρ <sub>calc</sub> /cm <sup>3</sup>          | 28.234                                                        |
| μ/mm <sup>-1</sup>                          | 2.689                                                         |
| F(000)                                      | 24300.0                                                       |
| Crystal size/mm <sup>3</sup>                | 0.24 × 0.09 × 0.09                                            |
| Radiation                                   | Mo Kα (λ = 0.71073)                                           |
| 2θ range for data collection/°              | 4.476 to 54.966                                               |
| Index ranges                                | -19 ≤ h ≤ 19, -14 ≤ k ≤ 13, -20 ≤ l ≤ 20                      |
| Reflections collected                       | 26837                                                         |
| Independent reflections                     | 6128 [R <sub>int</sub> = 0.0504, R <sub>sigma</sub> = 0.0491] |
| Data/restraints/parameters                  | 6128/108/366                                                  |
| Goodness-of-fit on F <sup>2</sup>           | 1.052                                                         |
| Final R indexes [I ≥ 2σ (I)]                | R <sub>1</sub> = 0.0615, wR <sub>2</sub> = 0.1631             |
| Final R indexes [all data]                  | R <sub>1</sub> = 0.0791, wR <sub>2</sub> = 0.1720             |
| Largest diff. peak/hole / e Å <sup>-3</sup> | 0.50/-0.27                                                    |

**Table S8.** Fractional Atomic Coordinates (×10<sup>4</sup>) and Equivalent Isotropic Displacement Parameters (Å<sup>2</sup>×10<sup>3</sup>) for **5**. U<sub>eq</sub> is defined as 1/3 of the trace of the orthogonalised U<sub>ij</sub> tensor.

| Atom | x          | y          | z          | U(eq)     |
|------|------------|------------|------------|-----------|
| Si1  | 5956.9(3)  | 4776.0(5)  | 7395.1(4)  | 36.19(17) |
| C9   | 5105.9(11) | 5771.0(16) | 5709.9(12) | 31.5(4)   |
| C7   | 4686.3(11) | 4661.1(16) | 5801.7(12) | 30.7(4)   |
| C10  | 5273.0(12) | 6668.1(16) | 6394.2(13) | 34.5(4)   |
| C8   | 4597.5(12) | 3937.8(16) | 5088.8(13) | 32.0(4)   |
| C6   | 4326.6(12) | 4191.7(16) | 6605.8(13) | 33.7(4)   |
| C1   | 4849.4(13) | 4082.3(17) | 7350.8(13) | 36.2(4)   |
| C15  | 5728.6(13) | 6372.9(18) | 7147.2(14) | 37.9(4)   |
| C5   | 3475.1(14) | 3756.8(19) | 6569.8(14) | 40.8(5)   |
| C11  | 5015.6(14) | 7847.7(18) | 6222.0(16) | 44.1(5)   |
| C2   | 4479.0(15) | 3512(2)    | 8037.9(14) | 44.9(5)   |
| N2   | 4930.8(19) | 9946.6(19) | 6589(2)    | 82.1(9)   |
| C20  | 6461.4(14) | 4569(2)    | 8480.3(14) | 43.7(5)   |
| N1   | 2281.8(15) | 2707(3)    | 7206.1(17) | 76.7(8)   |

| Atom | x          | y        | z           | U(eq)    |
|------|------------|----------|-------------|----------|
| C14  | 5934.7(15) | 7320(2)  | 7701.7(17)  | 51.5(6)  |
| C4   | 3116.9(15) | 3176(2)  | 7266.7(15)  | 49.2(6)  |
| C12  | 5203.0(16) | 8767(2)  | 6786.8(19)  | 55.0(6)  |
| C3   | 3638.4(17) | 3072(2)  | 8000.4(15)  | 51.5(6)  |
| C25  | 6072.3(16) | 5018(2)  | 9204.0(15)  | 53.6(6)  |
| C13  | 5677.1(17) | 8493(2)  | 7515(2)     | 61.1(7)  |
| C21  | 7227.4(17) | 3914(3)  | 8607.7(16)  | 60.0(7)  |
| C24  | 6428.8(19) | 4813(3)  | 10006.9(16) | 67.3(8)  |
| C17  | 1658.8(17) | 3185(3)  | 6612(2)     | 78.0(9)  |
| C22  | 7587(2)    | 3721(4)  | 9413.4(19)  | 80.1(10) |
| C16  | 1986(2)    | 1923(3)  | 7851(2)     | 87.1(11) |
| C23  | 7181(2)    | 4163(4)  | 10111.8(18) | 78.2(9)  |
| C19  | 4973(4)    | 10789(3) | 7274(3)     | 138(2)   |
| C18  | 4224(4)    | 10117(3) | 5980(4)     | 152(2)   |
| C28  | 7873(9)    | 4662(19) | 5616(7)     | 92(4)    |
| C29  | 7810(9)    | 3520(20) | 5317(8)     | 99(4)    |
| C31  | 6666(8)    | 3127(12) | 6228(10)    | 64(3)    |
| C27  | 7328(8)    | 5034(13) | 6243(9)     | 61(3)    |
| C26  | 6666(13)   | 4270(11) | 6536(12)    | 38(2)    |
| C30  | 7229(10)   | 2740(20) | 5608(11)    | 96(5)    |
| C36  | 7028(8)    | 2188(12) | 5856(8)     | 73(3)    |
| C37  | 6589(6)    | 2744(11) | 6490(7)     | 51(2)    |
| C33  | 7130(8)    | 4628(13) | 6047(8)     | 60(3)    |
| C35  | 7510(12)   | 2820(17) | 5317(7)     | 89(4)    |
| C34  | 7569(11)   | 4047(16) | 5394(9)     | 97(5)    |
| C32  | 6662(11)   | 3957(13) | 6611(11)    | 40(2)    |

**Table S9.** Anisotropic Displacement Parameters ( $\times 10^4$ ) for **5**. The anisotropic displacement factor exponent takes the form:  $-2p^2[h^2a^{*2} \times U_{11} + \dots + 2hka^* \times b^* \times U_{12}]$

| Atom | U <sub>11</sub> | U <sub>22</sub> | U <sub>33</sub> | U <sub>23</sub> | U <sub>13</sub> | U <sub>12</sub> |
|------|-----------------|-----------------|-----------------|-----------------|-----------------|-----------------|
| Si1  | 32.2(3)         | 38.9(3)         | 38.0(3)         | -6.0(2)         | 8.4(2)          | 5.8(2)          |
| C9   | 26.8(8)         | 24.5(9)         | 43.3(10)        | 1.7(8)          | 5.8(7)          | 2.3(7)          |
| C7   | 27.6(9)         | 24.5(9)         | 40.2(10)        | 3.0(7)          | 5.8(7)          | 1.7(7)          |
| C10  | 29.7(9)         | 26.4(9)         | 48.4(11)        | -4.2(8)         | 14.9(8)         | -1.3(7)         |

| Atom | U <sub>11</sub> | U <sub>22</sub> | U <sub>33</sub> | U <sub>23</sub> | U <sub>13</sub> | U <sub>12</sub> |
|------|-----------------|-----------------|-----------------|-----------------|-----------------|-----------------|
| C8   | 28.7(9)         | 22.3(8)         | 45.4(11)        | 3.3(8)          | 5.3(8)          | -3.3(7)         |
| C6   | 35.4(9)         | 22.8(9)         | 43.6(11)        | 1.2(8)          | 12.1(8)         | 1.0(7)          |
| C1   | 40.2(10)        | 26.4(9)         | 42.6(11)        | -1.3(8)         | 11.3(8)         | 2.0(8)          |
| C15  | 31.4(9)         | 34.9(10)        | 48.0(11)        | -10.2(9)        | 11.3(8)         | -4.1(8)         |
| C5   | 38.3(10)        | 37.1(11)        | 47.8(12)        | 2.9(9)          | 10.5(9)         | -6.5(9)         |
| C11  | 41.3(11)        | 26.2(10)        | 65.9(14)        | -1.2(9)         | 17.1(10)        | 1.4(8)          |
| C2   | 55.1(13)        | 41.1(12)        | 38.9(11)        | -0.1(9)         | 9.1(9)          | 0.3(10)         |
| N2   | 84.1(17)        | 26.5(10)        | 138(3)          | -21.5(13)       | 38.7(17)        | 0.2(11)         |
| C20  | 38.5(11)        | 53.7(13)        | 39.4(11)        | -5.4(10)        | 6.6(8)          | 3.4(10)         |
| N1   | 54.5(13)        | 99(2)           | 77.9(16)        | 21.8(14)        | 13.6(12)        | -36.7(13)       |
| C14  | 46.9(12)        | 51.9(14)        | 56.5(14)        | -20.7(11)       | 13.1(10)        | -11.7(10)       |
| C4   | 47.1(12)        | 45.3(13)        | 56.2(14)        | 1.8(10)         | 19.0(10)        | -12.2(10)       |
| C12  | 52.5(13)        | 29.6(11)        | 84.7(18)        | -11.6(11)       | 28.5(13)        | -4.0(10)        |
| C3   | 64.8(15)        | 44.9(13)        | 45.9(13)        | 4.3(10)         | 20.3(11)        | -10.9(11)       |
| C25  | 44.0(12)        | 71.0(17)        | 46.3(13)        | -15.1(12)       | 10.7(10)        | -1.6(11)        |
| C13  | 56.8(14)        | 42.1(13)        | 86.1(19)        | -32.9(13)       | 29.0(13)        | -16.3(11)       |
| C21  | 51.3(14)        | 80.4(19)        | 48.6(14)        | 2.5(13)         | 7.1(11)         | 18.6(13)        |
| C24  | 63.8(16)        | 97(2)           | 42.0(13)        | -13.6(14)       | 13.9(12)        | -15.2(16)       |
| C17  | 42.0(14)        | 83(2)           | 110(3)          | -3.2(19)        | 20.3(16)        | -12.7(14)       |
| C22  | 62.2(17)        | 123(3)          | 54.8(16)        | 13.1(17)        | -3.5(13)        | 23.9(18)        |
| C16  | 75(2)           | 84(2)           | 105(3)          | 12.8(19)        | 45.3(19)        | -29.8(17)       |
| C23  | 68.2(19)        | 120(3)          | 46.5(15)        | 8.8(17)         | -2.8(13)        | -6.7(19)        |
| C19  | 243(6)          | 36.0(17)        | 139(4)          | -22(2)          | 72(4)           | 10(3)           |
| C18  | 169(5)          | 45(2)           | 240(7)          | 8(3)            | -45(5)          | 43(3)           |
| C28  | 76(6)           | 144(10)         | 60(5)           | 14(6)           | 32(4)           | 41(6)           |
| C29  | 78(6)           | 165(13)         | 55(5)           | -21(7)          | 12(4)           | 65(7)           |
| C31  | 67(4)           | 52(5)           | 74(7)           | -15(5)          | 2(4)            | 24(4)           |
| C27  | 45(5)           | 79(6)           | 60(6)           | 11(4)           | 23(4)           | 15(4)           |
| C26  | 46(4)           | 37(5)           | 31(4)           | 5(4)            | 0(3)            | 25(4)           |
| C30  | 95(8)           | 124(11)         | 69(9)           | -52(8)          | -2(5)           | 51(7)           |
| C36  | 69(5)           | 86(6)           | 63(5)           | -29(4)          | -8(3)           | 45(4)           |
| C37  | 47(3)           | 51(5)           | 55(5)           | -15(3)          | 1(3)            | 23(3)           |
| C33  | 50(5)           | 76(6)           | 55(5)           | 10(4)           | 20(4)           | 24(4)           |
| C35  | 105(9)          | 128(8)          | 37(4)           | -3(5)           | 17(4)           | 79(7)           |



|     | <b>Atom U<sub>11</sub></b> | <b>U<sub>22</sub></b> | <b>U<sub>33</sub></b> | <b>U<sub>23</sub></b> | <b>U<sub>13</sub></b> | <b>U<sub>12</sub></b> |
|-----|----------------------------|-----------------------|-----------------------|-----------------------|-----------------------|-----------------------|
| C34 | 105(9)                     | 123(8)                | 64(6)                 | 28(6)                 | 48(6)                 | 70(7)                 |
| C32 | 35(3)                      | 49(6)                 | 37(4)                 | 2(5)                  | 4(3)                  | 27(4)                 |

**Table S10.** Bond Lengths in Å for **5**.

| <b>Atom</b> | <b>Atom</b>     | <b>Length/Å</b> | <b>Atom</b> | <b>Atom</b> | <b>Length/Å</b> |
|-------------|-----------------|-----------------|-------------|-------------|-----------------|
| Si1         | C1              | 1.866(2)        | C20         | C21         | 1.392(3)        |
| Si1         | C15             | 1.855(2)        | N1          | C4          | 1.384(3)        |
| Si1         | C20             | 1.866(2)        | N1          | C17         | 1.419(4)        |
| Si1         | C26             | 1.852(17)       | N1          | C16         | 1.426(4)        |
| Si1         | C32             | 1.901(16)       | C14         | C13         | 1.396(4)        |
| C9          | C7              | 1.406(3)        | C4          | C3          | 1.387(4)        |
| C9          | C10             | 1.486(3)        | C12         | C13         | 1.371(4)        |
| C9          | C8 <sup>1</sup> | 1.389(3)        | C25         | C24         | 1.379(4)        |
| C7          | C8              | 1.385(3)        | C21         | C22         | 1.382(4)        |
| C7          | C6              | 1.492(3)        | C24         | C23         | 1.369(5)        |
| C10         | C15             | 1.395(3)        | C22         | C23         | 1.372(4)        |
| C10         | C11             | 1.398(3)        | C28         | C29         | 1.366(17)       |
| C6          | C1              | 1.404(3)        | C28         | C27         | 1.378(13)       |
| C6          | C5              | 1.392(3)        | C29         | C30         | 1.335(18)       |
| C1          | C2              | 1.392(3)        | C31         | C26         | 1.364(14)       |
| C15         | C14             | 1.400(3)        | C31         | C30         | 1.393(15)       |
| C5          | C4              | 1.401(3)        | C27         | C26         | 1.414(17)       |
| C11         | C12             | 1.382(3)        | C36         | C37         | 1.370(11)       |
| C2          | C3              | 1.379(3)        | C36         | C35         | 1.343(15)       |
| N2          | C12             | 1.412(3)        | C37         | C32         | 1.370(13)       |
| N2          | C19             | 1.431(5)        | C33         | C34         | 1.406(13)       |
| N2          | C18             | 1.435(6)        | C33         | C32         | 1.382(15)       |
| C20         | C25             | 1.396(3)        | C35         | C34         | 1.378(17)       |

**Table S11.** Bond Angles in ° for **5**.

| <b>Atom</b> | <b>Atom</b> | <b>Atom</b> | <b>Angle/°</b> | <b>Atom</b> | <b>Atom</b> | <b>Atom</b> | <b>Angle/°</b> |
|-------------|-------------|-------------|----------------|-------------|-------------|-------------|----------------|
| C1          | Si1         | C20         | 109.41(10)     | C21         | C20         | Si1         | 121.28(17)     |
| C1          | Si1         | C32         | 108.2(6)       | C21         | C20         | C25         | 116.9(2)       |

**Atom Atom Atom Angle/°**

|                 |     |                 |            |
|-----------------|-----|-----------------|------------|
| C15             | Si1 | C1              | 103.04(9)  |
| C15             | Si1 | C20             | 112.40(10) |
| C15             | Si1 | C32             | 115.7(5)   |
| C20             | Si1 | C32             | 107.9(6)   |
| C26             | Si1 | C1              | 113.7(6)   |
| C26             | Si1 | C15             | 104.5(4)   |
| C26             | Si1 | C20             | 113.3(6)   |
| C7              | C9  | C10             | 126.00(17) |
| C8 <sup>1</sup> | C9  | C7              | 117.63(17) |
| C8 <sup>1</sup> | C9  | C10             | 116.36(16) |
| C9              | C7  | C6              | 125.45(17) |
| C8              | C7  | C9              | 117.62(17) |
| C8              | C7  | C6              | 116.94(16) |
| C15             | C10 | C9              | 121.71(17) |
| C15             | C10 | C11             | 121.14(19) |
| C11             | C10 | C9              | 116.94(19) |
| C7              | C8  | C9 <sup>1</sup> | 124.75(17) |
| C1              | C6  | C7              | 121.47(17) |
| C5              | C6  | C7              | 117.40(18) |
| C5              | C6  | C1              | 120.84(18) |
| C6              | C1  | Si1             | 119.29(14) |
| C2              | C1  | Si1             | 123.71(17) |
| C2              | C1  | C6              | 116.89(19) |
| C10             | C15 | Si1             | 119.42(14) |
| C10             | C15 | C14             | 116.6(2)   |
| C14             | C15 | Si1             | 123.85(19) |
| C6              | C5  | C4              | 121.4(2)   |
| C12             | C11 | C10             | 121.6(2)   |
| C3              | C2  | C1              | 122.3(2)   |
| C12             | N2  | C19             | 116.1(3)   |
| C12             | N2  | C18             | 118.8(3)   |
| C19             | N2  | C18             | 115.4(4)   |
| C25             | C20 | Si1             | 121.79(18) |

**Atom Atom Atom Angle/°**

|     |     |     |           |
|-----|-----|-----|-----------|
| C4  | N1  | C17 | 120.3(2)  |
| C4  | N1  | C16 | 119.9(3)  |
| C17 | N1  | C16 | 118.5(2)  |
| C13 | C14 | C15 | 121.3(3)  |
| N1  | C4  | C5  | 120.4(2)  |
| N1  | C4  | C3  | 122.2(2)  |
| C3  | C4  | C5  | 117.4(2)  |
| C11 | C12 | N2  | 119.8(3)  |
| C13 | C12 | C11 | 117.7(2)  |
| C13 | C12 | N2  | 122.5(2)  |
| C2  | C3  | C4  | 121.2(2)  |
| C24 | C25 | C20 | 121.4(2)  |
| C12 | C13 | C14 | 121.6(2)  |
| C22 | C21 | C20 | 121.5(2)  |
| C23 | C24 | C25 | 120.4(2)  |
| C23 | C22 | C21 | 120.1(3)  |
| C24 | C23 | C22 | 119.7(3)  |
| C29 | C28 | C27 | 119.4(11) |
| C30 | C29 | C28 | 122.0(10) |
| C26 | C31 | C30 | 123.1(12) |
| C28 | C27 | C26 | 120.7(11) |
| C31 | C26 | Si1 | 123.4(11) |
| C31 | C26 | C27 | 116.1(13) |
| C27 | C26 | Si1 | 120.0(10) |
| C29 | C30 | C31 | 118.3(12) |
| C35 | C36 | C37 | 121.0(9)  |
| C36 | C37 | C32 | 120.6(10) |
| C32 | C33 | C34 | 119.4(10) |
| C36 | C35 | C34 | 120.2(8)  |
| C35 | C34 | C33 | 119.4(10) |
| C37 | C32 | Si1 | 121.4(9)  |
| C37 | C32 | C33 | 119.2(12) |
| C33 | C32 | Si1 | 118.3(8)  |

**Table S12.** Hydrogen Fractional Atomic Coordinates ( $\times 10^4$ ) and Equivalent Isotropic Displacement Parameters ( $\text{\AA}^2 \times 10^3$ ) for **5**.  $U_{eq}$  is defined as 1/3 of the trace of the orthogonalised  $U_{ij}$ .

| Atom | <i>x</i> | <i>y</i> | <i>z</i> | U(eq) |
|------|----------|----------|----------|-------|
| H8   | 4313.06  | 3188.15  | 5150.62  | 38    |
| H5   | 3129.74  | 3855.61  | 6062.21  | 49    |
| H11  | 4704.64  | 8020.91  | 5704.36  | 53    |
| H2   | 4817.11  | 3423.73  | 8550.89  | 54    |
| H14  | 6256.38  | 7161.12  | 8215.65  | 62    |
| H3   | 3412.28  | 2690.15  | 8485.66  | 62    |
| H25  | 5550.85  | 5473.42  | 9142.14  | 64    |
| H13  | 5834.22  | 9115.89  | 7901.6   | 73    |
| H21  | 7509.86  | 3593.41  | 8130     | 72    |
| H24  | 6150.46  | 5124.67  | 10489.86 | 81    |
| H17A | 1625.1   | 4056.1   | 6684.26  | 117   |
| H17B | 1086.17  | 2829.3   | 6707.43  | 117   |
| H17C | 1834.93  | 3001.27  | 6033.16  | 117   |
| H22  | 8114.65  | 3281.31  | 9483.41  | 96    |
| H16A | 2417.79  | 1286.95  | 7953.9   | 131   |
| H16B | 1427.69  | 1566.16  | 7666.6   | 131   |
| H16C | 1910.51  | 2376.38  | 8377.04  | 131   |
| H23  | 7422.47  | 4017.69  | 10666.2  | 94    |
| H19A | 4633.77  | 10486.99 | 7745.85  | 207   |
| H19B | 4730.7   | 11558.2  | 7079.57  | 207   |
| H19C | 5581.78  | 10899.36 | 7465.95  | 207   |
| H18A | 4402.09  | 9847.58  | 5419.23  | 228   |
| H18B | 4069.44  | 10968.56 | 5953.65  | 228   |
| H18C | 3717.44  | 9651.56  | 6152.45  | 228   |
| H28  | 8289.26  | 5198.5   | 5393.46  | 111   |
| H29  | 8192.23  | 3262.29  | 4888.66  | 119   |
| H31  | 6263.82  | 2569.13  | 6448.24  | 77    |
| H27  | 7397.86  | 5811.46  | 6480.74  | 73    |
| H30  | 7199.21  | 1942.19  | 5396.39  | 116   |
| H36  | 6990.92  | 1342.19  | 5796.84  | 88    |

| Atom | x       | y       | z       | U(eq) |
|------|---------|---------|---------|-------|
| H37  | 6231.92 | 2285.18 | 6849.09 | 61    |
| H33  | 7156.14 | 5475.24 | 6100.61 | 72    |
| H35  | 7810.23 | 2419.88 | 4881.45 | 107   |
| H34  | 7903.79 | 4496.73 | 5008.72 | 116   |

### 6-3. X-ray structure of compound 9

A single crystal of 3,17-dimethoxy-*N*<sup>7</sup>,*N*<sup>7</sup>,*N*<sup>13</sup>,*N*<sup>13</sup>-tetramethyl-10,10-diphenyl-10*H*-dibenzo[*b,f*]triphenylene[2,3-*d*]silepin-7,13-diamine (C<sub>48</sub>H<sub>42</sub>N<sub>2</sub>O<sub>2</sub>Si) (**9**) was prepared by recrystallization from the dichloromethane/ethanol solution. A suitable crystal was selected, and the X-ray diffraction was collected on an Rigaku AFC HyPix-6000 diffractometer: fixed-chi single diffractometer with graphite monochromated Mo-K $\alpha$  radiation ( $\lambda = 0.71073\text{\AA}$ ). The crystal was kept at 100 K during data collection. The data were collected using  $\omega$  scan in the  $\theta$  range of  $4.038 \leq \theta \leq 54.968$  deg. The data were corrected for Lorentz and polarization effects. The structures were solved by direct methods,<sup>13</sup> and expanded using Fourier techniques.<sup>14</sup> Hydrogen atoms were refined using the riding model. The final cycle of full-matrix least-squares refinement on  $F^2$  was based on 44667 observed reflections. Neutral atom scattering factors were taken from Cromer and Waber.<sup>15</sup> All calculations were performed using the Olex-2 crystallographic software package except for refinement,<sup>16</sup> which was performed using version 2018/3 of ShelXL (Sheldrick, 2015) of final refinement as well as the bond lengths and angles are summarized in the supporting information, and the numbering scheme employed is also shown in the supporting information, which were drawn with ORTEP at 50% probability ellipsoid.

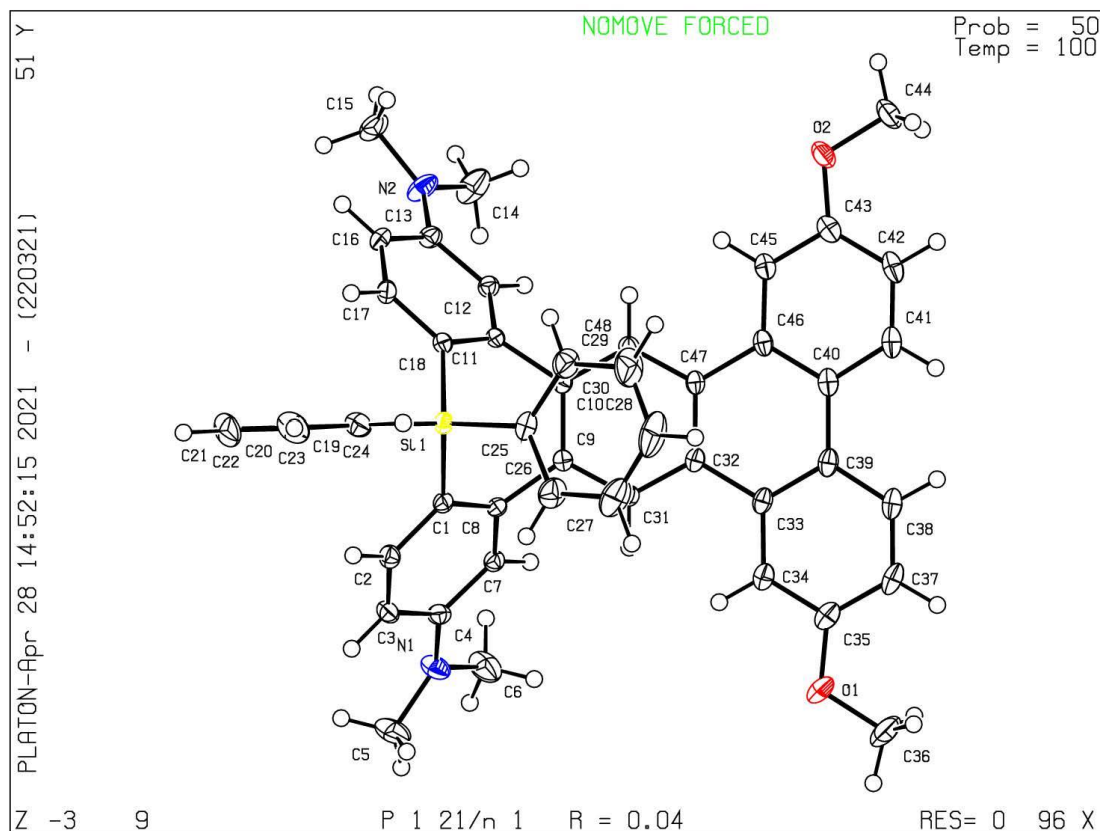

### Crystal structure determination of **9**

$\text{C}_{48}\text{H}_{42}\text{N}_2\text{O}_2\text{Si}$  ( $M = 706.92$  g/mol): monoclinic, space group  $P2_1/n$  (no. 14),  $a = 9.1920(3)$  Å,  $b = 20.3292(6)$  Å,  $c = 20.1781(5)$  Å,  $\beta = 90.337(2)$ ,  $V = 3770.54(19)$  Å<sup>3</sup>,  $Z = 4$ ,  $T = 100$  K,  $\mu(\text{Mo K}\alpha) = 0.105$  mm<sup>-1</sup>,  $D_{\text{calc}} = 1.245$  g/cm<sup>3</sup>, 44667 reflections measured ( $4.038^\circ \leq 2\theta \leq 54.968^\circ$ ), 8637 unique ( $R_{\text{int}} = 0.0329$ ,  $R_{\text{sigma}} = 0.0259$ ) which were used in all calculations. The final  $R_1$  was 0.0389 ( $I > 2\sigma(I)$ ) and  $wR_2$  was 0.1042 (all data).

**Table S13.** Crystal data and structure refinement for **9**

|                   |                                                           |
|-------------------|-----------------------------------------------------------|
| Empirical formula | $\text{C}_{48}\text{H}_{42}\text{N}_2\text{O}_2\text{Si}$ |
| Formula weight    | 706.92                                                    |
| Temperature/K     | 100                                                       |
| Crystal system    | monoclinic                                                |
| Space group       | $P2_1/n$                                                  |
| $a/\text{Å}$      | 9.1920(3)                                                 |
| $b/\text{Å}$      | 20.3292(6)                                                |
| $c/\text{Å}$      | 20.1781(5)                                                |
| $\alpha/^\circ$   | 90                                                        |

|                                                |                                                               |
|------------------------------------------------|---------------------------------------------------------------|
| $\beta/^\circ$                                 | 90.337(2)                                                     |
| $\gamma/^\circ$                                | 90                                                            |
| Volume/ $\text{\AA}^3$                         | 3770.54(19)                                                   |
| Z                                              | 4                                                             |
| $\rho_{\text{calc}}/\text{cm}^3$               | 1.245                                                         |
| $\mu/\text{mm}^{-1}$                           | 0.105                                                         |
| F(000)                                         | 1496.0                                                        |
| Crystal size/ $\text{mm}^3$                    | $0.305 \times 0.19 \times 0.109$                              |
| Radiation                                      | Mo K $\alpha$ ( $\lambda = 0.71073$ )                         |
| 2 $\theta$ range for data collection/ $^\circ$ | 4.038 to 54.968                                               |
| Index ranges                                   | $-11 \leq h \leq 11, -26 \leq k \leq 23, -26 \leq l \leq 25$  |
| Reflections collected                          | 44667                                                         |
| Independent reflections                        | 8637 [ $R_{\text{int}} = 0.0329, R_{\text{sigma}} = 0.0259$ ] |
| Data/restraints/parameters                     | 8637/0/484                                                    |
| Goodness-of-fit on $F^2$                       | 1.051                                                         |
| Final R indexes [ $I \geq 2\sigma(I)$ ]        | $R_1 = 0.0389, wR_2 = 0.0998$                                 |
| Final R indexes [all data]                     | $R_1 = 0.0470, wR_2 = 0.1042$                                 |
| Largest diff. peak/hole / $e \text{\AA}^{-3}$  | 0.36/-0.35                                                    |

**Table S14.** Fractional Atomic Coordinates ( $\times 10^4$ ) and Equivalent Isotropic Displacement Parameters ( $\text{\AA}^2 \times 10^3$ ) for **9**.  $U_{\text{eq}}$  is defined as 1/3 of the trace of the orthogonalised  $U_{\text{ij}}$  tensor.

| Atom | x          | y         | z         | U(eq)    |
|------|------------|-----------|-----------|----------|
| Si1  | 3302.1(3)  | 6608.3(2) | 4351.2(2) | 13.65(8) |
| O1   | 6425.3(12) | 9918.6(5) | 2082.7(5) | 32.3(2)  |
| O2   | 7101.2(11) | 9552.2(5) | 6931.9(5) | 25.3(2)  |
| N1   | -473.9(13) | 7942.2(6) | 2263.8(6) | 25.2(3)  |
| N2   | -399.6(14) | 7621.3(6) | 6615.2(6) | 27.4(3)  |
| C1   | 2249.2(13) | 7004.4(6) | 3668.2(6) | 14.8(2)  |
| C2   | 1543.4(13) | 6655.6(6) | 3162.4(6) | 17.5(2)  |
| C3   | 683.3(14)  | 6959.4(6) | 2689.5(6) | 19.6(3)  |
| C4   | 436.8(13)  | 7641.2(6) | 2714.9(6) | 17.5(2)  |
| C5   | -829.5(19) | 7594.0(8) | 1663.2(7) | 35.5(4)  |
| C6   | -793.8(19) | 8630.9(8) | 2317.0(8) | 35.9(4)  |
| C7   | 1158.8(13) | 8002.0(6) | 3214.1(6) | 15.8(2)  |

| <b>Atom</b> | <b>x</b>   | <b>y</b>    | <b>z</b>   | <b>U(eq)</b> |
|-------------|------------|-------------|------------|--------------|
| C8          | 2063.6(12) | 7692.9(6)   | 3673.2(6)  | 14.0(2)      |
| C9          | 2979.3(12) | 8112.7(6)   | 4114.1(6)  | 13.8(2)      |
| C10         | 3027.3(12) | 8072.8(6)   | 4813.2(6)  | 13.5(2)      |
| C11         | 2159.8(12) | 7590.3(6)   | 5206.6(6)  | 14.0(2)      |
| C12         | 1252.8(13) | 7822.7(6)   | 5701.4(6)  | 15.8(2)      |
| C13         | 539.3(13)  | 7390.2(6)   | 6137.8(6)  | 18.1(2)      |
| C14         | -675(2)    | 8307.8(8)   | 6677.6(9)  | 37.8(4)      |
| C15         | -823.8(17) | 7190.6(7)   | 7148.5(7)  | 30.0(3)      |
| C16         | 817.7(14)  | 6714.6(6)   | 6071.3(6)  | 18.8(3)      |
| C17         | 1691.4(13) | 6487.8(6)   | 5563.1(6)  | 17.2(2)      |
| C18         | 2370.9(13) | 6908.6(6)   | 5111.3(6)  | 14.7(2)      |
| C19         | 3090.3(14) | 5695.3(6)   | 4282.6(6)  | 17.6(2)      |
| C20         | 1695.0(15) | 5416.4(7)   | 4266.8(7)  | 24.4(3)      |
| C21         | 1497.6(18) | 4743.8(7)   | 4200.6(8)  | 32.3(3)      |
| C22         | 2689.6(19) | 4333.3(7)   | 4150.8(8)  | 34.8(4)      |
| C23         | 4077.7(18) | 4594.3(7)   | 4169.8(7)  | 31.2(3)      |
| C24         | 4274.4(15) | 5271.0(7)   | 4235.9(6)  | 21.8(3)      |
| C25         | 5250.8(13) | 6862.2(6)   | 4312.3(6)  | 18.4(2)      |
| C26         | 5926.8(16) | 6942.4(8)   | 3698.1(8)  | 29.0(3)      |
| C27         | 7349.7(17) | 7156.2(9)   | 3649.4(9)  | 39.6(4)      |
| C28         | 8137.8(17) | 7291.0(9)   | 4219.2(10) | 43.6(4)      |
| C29         | 7493.2(18) | 7224.1(9)   | 4832.9(10) | 42.8(4)      |
| C30         | 6059.4(15) | 7013.6(8)   | 4877.4(8)  | 29.0(3)      |
| C31         | 3899.1(13) | 8555.3(6)   | 3804.3(6)  | 15.1(2)      |
| C32         | 4911.4(13) | 8945.4(6)   | 4143.2(6)  | 15.2(2)      |
| C33         | 5889.1(13) | 9387.8(6)   | 3784.3(6)  | 17.1(2)      |
| C34         | 5786.2(14) | 9459.1(6)   | 3096.4(7)  | 20.8(3)      |
| C35         | 6644.0(15) | 9899.2(7)   | 2754.5(7)  | 24.0(3)      |
| C36         | 7149(2)    | 10423.0(10) | 1724.4(8)  | 43.1(4)      |
| C37         | 7646.1(15) | 10283.4(7)  | 3102.2(7)  | 27.6(3)      |
| C38         | 7777.6(15) | 10207.5(7)  | 3780.2(7)  | 24.8(3)      |
| C39         | 6919.6(13) | 9763.8(6)   | 4142.1(7)  | 19.0(3)      |
| C40         | 7028.5(13) | 9700.1(6)   | 4863.3(6)  | 18.2(2)      |
| C41         | 8067.3(14) | 10049.9(6)  | 5235.4(7)  | 22.2(3)      |

| Atom | x          | y          | z         | U(eq)   |
|------|------------|------------|-----------|---------|
| C42  | 8144.5(14) | 10013.9(6) | 5918.1(7) | 23.1(3) |
| C43  | 7152.4(14) | 9620.0(6)  | 6255.1(7) | 20.8(3) |
| C44  | 8008.1(17) | 9972.6(7)  | 7317.5(8) | 30.7(3) |
| C45  | 6131.1(14) | 9260.3(6)  | 5904.1(6) | 19.3(3) |
| C46  | 6048.8(13) | 9289.5(6)  | 5210.5(6) | 16.7(2) |
| C47  | 4967.2(13) | 8905.7(6)  | 4838.8(6) | 15.0(2) |
| C48  | 3987.9(13) | 8479.4(6)  | 5154.8(6) | 15.0(2) |

**Table S15.** Anisotropic Displacement Parameters ( $\times 10^4$ ) for **3a**. The anisotropic displacement factor exponent takes the form:  $-2p^2[h^2a^{*2} \times U_{11} + \dots + 2hka^* \times b^* \times U_{12}]$

| Atom | U <sub>11</sub> | U <sub>22</sub> | U <sub>33</sub> | U <sub>23</sub> | U <sub>13</sub> | U <sub>12</sub> |
|------|-----------------|-----------------|-----------------|-----------------|-----------------|-----------------|
| Si1  | 12.79(16)       | 12.87(16)       | 15.30(16)       | -0.46(12)       | 1.57(11)        | -1.09(11)       |
| O1   | 36.0(6)         | 35.9(6)         | 25.2(5)         | 10.4(4)         | 6.7(4)          | -11.5(5)        |
| O2   | 29.7(5)         | 21.9(5)         | 24.3(5)         | -2.8(4)         | -10.2(4)        | -5.1(4)         |
| N1   | 29.0(6)         | 25.9(6)         | 20.5(5)         | -2.5(5)         | -9.1(5)         | 3.9(5)          |
| N2   | 34.9(7)         | 22.7(6)         | 24.9(6)         | 4.3(5)          | 16.8(5)         | 4.7(5)          |
| C1   | 13.6(6)         | 16.2(6)         | 14.6(5)         | -0.6(4)         | 3.0(4)          | -1.4(4)         |
| C2   | 18.1(6)         | 15.7(6)         | 18.8(6)         | -2.8(5)         | 3.2(5)          | -1.1(5)         |
| C3   | 20.1(6)         | 22.2(6)         | 16.6(6)         | -4.8(5)         | -0.4(5)         | -3.8(5)         |
| C4   | 15.2(6)         | 23.4(6)         | 14.0(5)         | 0.5(5)          | 0.3(4)          | -0.8(5)         |
| C5   | 42.7(9)         | 39.9(9)         | 23.8(7)         | -2.8(6)         | -16.2(6)        | 5.9(7)          |
| C6   | 45.1(9)         | 26.7(8)         | 35.6(8)         | 1.5(6)          | -21.2(7)        | 5.1(7)          |
| C7   | 16.2(6)         | 15.7(6)         | 15.4(5)         | -0.3(4)         | 2.6(4)          | -1.1(4)         |
| C8   | 13.1(5)         | 16.8(6)         | 12.3(5)         | -0.6(4)         | 3.2(4)          | -2.1(4)         |
| C9   | 12.7(5)         | 13.2(5)         | 15.5(5)         | -1.0(4)         | 0.7(4)          | 0.4(4)          |
| C10  | 13.2(5)         | 11.9(5)         | 15.4(5)         | 0.2(4)          | 1.7(4)          | 0.3(4)          |
| C11  | 12.7(5)         | 16.6(6)         | 12.8(5)         | 0.6(4)          | -1.7(4)         | -2.9(4)         |
| C12  | 17.0(6)         | 14.6(6)         | 15.8(6)         | 0.1(4)          | 0.7(4)          | 0.0(4)          |
| C13  | 16.7(6)         | 21.5(6)         | 16.2(6)         | -0.1(5)         | 3.1(4)          | -0.7(5)         |
| C14  | 47.8(10)        | 24.5(8)         | 41.5(9)         | -0.1(7)         | 27.8(8)         | 5.3(7)          |
| C15  | 37.0(8)         | 28.1(7)         | 25.2(7)         | 0.9(6)          | 16.9(6)         | -3.3(6)         |
| C16  | 20.1(6)         | 18.9(6)         | 17.4(6)         | 3.0(5)          | 3.9(5)          | -4.4(5)         |
| C17  | 17.3(6)         | 14.9(6)         | 19.6(6)         | 0.1(5)          | 0.8(5)          | -3.0(4)         |
| C18  | 13.3(5)         | 16.2(6)         | 14.5(5)         | -0.3(4)         | -1.0(4)         | -1.7(4)         |



| <b>Atom</b> | <b>U<sub>11</sub></b> | <b>U<sub>22</sub></b> | <b>U<sub>33</sub></b> | <b>U<sub>23</sub></b> | <b>U<sub>13</sub></b> | <b>U<sub>12</sub></b> |
|-------------|-----------------------|-----------------------|-----------------------|-----------------------|-----------------------|-----------------------|
| C19         | 21.6(6)               | 15.7(6)               | 15.5(6)               | -0.6(5)               | 0.8(5)                | -0.9(5)               |
| C20         | 24.7(7)               | 19.3(6)               | 29.2(7)               | -1.4(5)               | 1.2(5)                | -3.6(5)               |
| C21         | 36.0(8)               | 21.8(7)               | 39.0(8)               | 0.5(6)                | -5.9(6)               | -10.4(6)              |
| C22         | 51.2(10)              | 14.2(7)               | 38.8(8)               | -1.5(6)               | -13.0(7)              | -2.9(6)               |
| C23         | 40.5(9)               | 20.1(7)               | 33.0(8)               | -4.7(6)               | -10.0(6)              | 9.6(6)                |
| C24         | 25.9(7)               | 20.0(6)               | 19.5(6)               | -1.6(5)               | -3.0(5)               | 2.3(5)                |
| C25         | 14.2(6)               | 14.3(6)               | 26.8(7)               | 2.5(5)                | 3.0(5)                | 1.5(4)                |
| C26         | 22.7(7)               | 32.4(8)               | 31.9(8)               | -1.6(6)               | 8.9(6)                | -0.9(6)               |
| C27         | 24.8(8)               | 42.1(9)               | 52.1(10)              | 5.6(8)                | 17.9(7)               | -1.5(7)               |
| C28         | 15.2(7)               | 41.3(10)              | 74.4(13)              | 13.9(9)               | 6.2(7)                | -5.0(6)               |
| C29         | 23.5(8)               | 48.8(10)              | 56.0(11)              | 11.6(8)               | -14.6(7)              | -11.0(7)              |
| C30         | 20.4(7)               | 34.4(8)               | 32.0(8)               | 8.2(6)                | -4.3(5)               | -4.5(6)               |
| C31         | 15.6(6)               | 14.3(6)               | 15.3(5)               | -0.2(4)               | 2.3(4)                | 0.2(4)                |
| C32         | 13.4(6)               | 12.4(5)               | 19.8(6)               | 0.5(5)                | 2.4(4)                | 0.4(4)                |
| C33         | 14.2(6)               | 13.4(6)               | 23.9(6)               | 1.0(5)                | 4.0(5)                | 0.3(4)                |
| C34         | 18.7(6)               | 18.6(6)               | 25.1(6)               | 1.3(5)                | 3.3(5)                | -3.3(5)               |
| C35         | 23.0(7)               | 22.7(7)               | 26.4(7)               | 4.9(5)                | 6.5(5)                | -0.5(5)               |
| C36         | 43.2(10)              | 51.3(11)              | 34.8(9)               | 20.1(8)               | 5.9(7)                | -17.1(8)              |
| C37         | 23.0(7)               | 24.5(7)               | 35.3(8)               | 6.4(6)                | 8.3(6)                | -7.6(5)               |
| C38         | 18.5(6)               | 21.3(7)               | 34.7(7)               | 1.5(6)                | 2.2(5)                | -6.4(5)               |
| C39         | 14.0(6)               | 15.1(6)               | 28.0(7)               | 0.2(5)                | 3.3(5)                | -0.5(4)               |
| C40         | 13.7(6)               | 13.8(6)               | 27.2(6)               | -1.3(5)               | -0.5(5)               | 0.5(4)                |
| C41         | 15.4(6)               | 16.5(6)               | 34.6(7)               | -1.2(5)               | -0.6(5)               | -2.5(5)               |
| C42         | 17.7(6)               | 17.2(6)               | 34.3(7)               | -4.2(5)               | -8.1(5)               | -0.8(5)               |
| C43         | 20.5(6)               | 16.6(6)               | 25.3(6)               | -2.6(5)               | -6.3(5)               | 2.7(5)                |
| C44         | 36.3(8)               | 25.1(7)               | 30.5(7)               | -4.2(6)               | -14.0(6)              | -7.1(6)               |
| C45         | 18.1(6)               | 15.7(6)               | 24.1(6)               | -0.8(5)               | -2.9(5)               | -1.3(5)               |
| C46         | 13.9(6)               | 12.2(6)               | 24.1(6)               | -1.7(5)               | -1.8(5)               | 0.8(4)                |
| C47         | 13.5(5)               | 11.9(6)               | 19.5(6)               | -0.7(4)               | -0.4(4)               | -0.2(4)               |
| C48         | 16.2(6)               | 13.8(6)               | 15.0(5)               | -0.7(4)               | -0.3(4)               | 0                     |

**Table S16.** Bond Lengths in Å for **9**.

| <b>Atom</b> | <b>Atom</b> | <b>Length/Å</b> | <b>Atom</b> | <b>Atom</b> | <b>Length/Å</b> |
|-------------|-------------|-----------------|-------------|-------------|-----------------|
| Si1         | C1          | 1.8625(12)      | C19         | C20         | 1.4024(18)      |

| Atom Atom Length/Å |     |            | Atom Atom Length/Å |     |            |
|--------------------|-----|------------|--------------------|-----|------------|
| Si1                | C18 | 1.8637(12) | C19                | C24 | 1.3924(18) |
| Si1                | C19 | 1.8711(13) | C20                | C21 | 1.386(2)   |
| Si1                | C25 | 1.8662(13) | C21                | C22 | 1.381(2)   |
| O1                 | C35 | 1.3698(17) | C22                | C23 | 1.382(2)   |
| O1                 | C36 | 1.4222(17) | C23                | C24 | 1.394(2)   |
| O2                 | C43 | 1.3736(16) | C25                | C26 | 1.3992(19) |
| O2                 | C44 | 1.4224(16) | C25                | C30 | 1.3918(19) |
| N1                 | C4  | 1.3764(16) | C26                | C27 | 1.382(2)   |
| N1                 | C5  | 1.4394(18) | C27                | C28 | 1.383(3)   |
| N1                 | C6  | 1.4349(19) | C28                | C29 | 1.383(3)   |
| N2                 | C13 | 1.3797(16) | C29                | C30 | 1.389(2)   |
| N2                 | C14 | 1.4241(19) | C31                | C32 | 1.3983(17) |
| N2                 | C15 | 1.4428(17) | C32                | C33 | 1.4659(16) |
| C1                 | C2  | 1.3990(17) | C32                | C47 | 1.4064(17) |
| C1                 | C8  | 1.4100(17) | C33                | C34 | 1.3982(18) |
| C2                 | C3  | 1.3813(18) | C33                | C39 | 1.4124(18) |
| C3                 | C4  | 1.4056(18) | C34                | C35 | 1.3801(18) |
| C4                 | C7  | 1.4090(17) | C35                | C37 | 1.394(2)   |
| C7                 | C8  | 1.3913(17) | C37                | C38 | 1.381(2)   |
| C8                 | C9  | 1.4900(16) | C38                | C39 | 1.4054(18) |
| C9                 | C10 | 1.4133(16) | C39                | C40 | 1.4639(18) |
| C9                 | C31 | 1.3861(16) | C40                | C41 | 1.4045(18) |
| C10                | C11 | 1.4952(16) | C40                | C46 | 1.4164(17) |
| C10                | C48 | 1.3895(16) | C41                | C42 | 1.381(2)   |
| C11                | C12 | 1.3874(17) | C42                | C43 | 1.394(2)   |
| C11                | C18 | 1.4126(17) | C43                | C45 | 1.3821(17) |
| C12                | C13 | 1.4092(17) | C45                | C46 | 1.4023(18) |
| C13                | C16 | 1.4036(18) | C46                | C47 | 1.4667(16) |
| C16                | C17 | 1.3852(17) | C47                | C48 | 1.4053(16) |
| C17                | C18 | 1.3999(17) |                    |     |            |

**Table S17.** Bond Angles in ° for **9**.

| Atom Atom Atom Angle/° |     |     |           | Atom Atom Atom Angle/° |     |     |            |
|------------------------|-----|-----|-----------|------------------------|-----|-----|------------|
| C1                     | Si1 | C18 | 103.19(5) | C24                    | C19 | C20 | 117.59(12) |

**Atom Atom Atom Angle/°**

|     |     |     |            |
|-----|-----|-----|------------|
| C1  | Si1 | C19 | 108.71(6)  |
| C1  | Si1 | C25 | 110.12(6)  |
| C18 | Si1 | C19 | 109.74(5)  |
| C18 | Si1 | C25 | 112.93(6)  |
| C25 | Si1 | C19 | 111.76(6)  |
| C35 | O1  | C36 | 117.22(12) |
| C43 | O2  | C44 | 117.39(11) |
| C4  | N1  | C5  | 118.20(12) |
| C4  | N1  | C6  | 120.56(11) |
| C6  | N1  | C5  | 119.81(12) |
| C13 | N2  | C14 | 120.53(11) |
| C13 | N2  | C15 | 119.14(12) |
| C14 | N2  | C15 | 118.67(12) |
| C2  | C1  | Si1 | 123.87(9)  |
| C2  | C1  | C8  | 116.91(11) |
| C8  | C1  | Si1 | 119.10(9)  |
| C3  | C2  | C1  | 122.58(12) |
| C2  | C3  | C4  | 120.49(11) |
| N1  | C4  | C3  | 120.78(11) |
| N1  | C4  | C7  | 121.56(12) |
| C3  | C4  | C7  | 117.65(11) |
| C8  | C7  | C4  | 121.20(11) |
| C1  | C8  | C9  | 120.32(10) |
| C7  | C8  | C1  | 121.04(11) |
| C7  | C8  | C9  | 118.18(11) |
| C10 | C9  | C8  | 125.27(10) |
| C31 | C9  | C8  | 116.51(10) |
| C31 | C9  | C10 | 118.15(11) |
| C9  | C10 | C11 | 123.63(10) |
| C48 | C10 | C9  | 118.49(11) |
| C48 | C10 | C11 | 117.79(10) |
| C12 | C11 | C10 | 118.90(11) |
| C12 | C11 | C18 | 121.04(11) |
| C18 | C11 | C10 | 119.81(10) |

**Atom Atom Atom Angle/°**

|     |     |     |            |
|-----|-----|-----|------------|
| C21 | C20 | C19 | 121.35(13) |
| C22 | C21 | C20 | 119.98(14) |
| C21 | C22 | C23 | 119.91(14) |
| C22 | C23 | C24 | 120.04(14) |
| C19 | C24 | C23 | 121.13(13) |
| C26 | C25 | Si1 | 120.06(11) |
| C30 | C25 | Si1 | 122.33(10) |
| C30 | C25 | C26 | 117.52(13) |
| C27 | C26 | C25 | 121.67(15) |
| C26 | C27 | C28 | 119.64(15) |
| C29 | C28 | C27 | 120.00(14) |
| C28 | C29 | C30 | 119.99(16) |
| C29 | C30 | C25 | 121.17(15) |
| C9  | C31 | C32 | 123.61(11) |
| C31 | C32 | C33 | 120.97(11) |
| C31 | C32 | C47 | 118.41(11) |
| C47 | C32 | C33 | 120.63(11) |
| C34 | C33 | C32 | 121.06(11) |
| C34 | C33 | C39 | 119.51(11) |
| C39 | C33 | C32 | 119.39(11) |
| C35 | C34 | C33 | 121.86(12) |
| O1  | C35 | C34 | 115.62(12) |
| O1  | C35 | C37 | 125.08(12) |
| C34 | C35 | C37 | 119.31(13) |
| C38 | C37 | C35 | 119.31(12) |
| C37 | C38 | C39 | 122.69(13) |
| C33 | C39 | C40 | 120.13(11) |
| C38 | C39 | C33 | 117.29(12) |
| C38 | C39 | C40 | 122.55(12) |
| C41 | C40 | C39 | 121.93(12) |
| C41 | C40 | C46 | 117.79(12) |
| C46 | C40 | C39 | 120.26(11) |
| C42 | C41 | C40 | 122.50(12) |
| C41 | C42 | C43 | 119.16(12) |

| Atom Atom Atom Angle/° |     |     |            | Atom Atom Atom Angle/° |     |     |            |
|------------------------|-----|-----|------------|------------------------|-----|-----|------------|
| C11                    | C12 | C13 | 121.40(11) | O2                     | C43 | C42 | 124.69(12) |
| N2                     | C13 | C12 | 121.27(12) | O2                     | C43 | C45 | 115.42(12) |
| N2                     | C13 | C16 | 121.01(11) | C45                    | C43 | C42 | 119.89(12) |
| C16                    | C13 | C12 | 117.72(11) | C43                    | C45 | C46 | 121.44(12) |
| C17                    | C16 | C13 | 120.21(11) | C40                    | C46 | C47 | 119.44(11) |
| C16                    | C17 | C18 | 122.79(12) | C45                    | C46 | C40 | 119.20(11) |
| C11                    | C18 | Si1 | 119.84(9)  | C45                    | C46 | C47 | 121.35(11) |
| C17                    | C18 | Si1 | 122.99(9)  | C32                    | C47 | C46 | 120.03(11) |
| C17                    | C18 | C11 | 116.66(11) | C48                    | C47 | C32 | 117.94(11) |
| C20                    | C19 | Si1 | 119.83(10) | C48                    | C47 | C46 | 122.01(11) |
| C24                    | C19 | Si1 | 122.57(10) | C10                    | C48 | C47 | 123.27(11) |

**Table S18.** Hydrogen Fractional Atomic Coordinates ( $\times 10^4$ ) and Equivalent Isotropic Displacement Parameters ( $\text{\AA}^2 \times 10^3$ ) for **9**.  $U_{eq}$  is defined as 1/3 of the trace of the orthogonalised  $U_{ij}$ .

| Atom | x        | y       | z       | U(eq) |
|------|----------|---------|---------|-------|
| H2   | 1660.25  | 6191.7  | 3143.48 | 21    |
| H3   | 255.24   | 6705.51 | 2344.53 | 24    |
| H5A  | 66.87    | 7438.92 | 1454.12 | 53    |
| H5B  | -1346.62 | 7889.46 | 1358.8  | 53    |
| H5C  | -1450.88 | 7216.76 | 1767.7  | 53    |
| H6A  | -1096.61 | 8731.71 | 2770.65 | 54    |
| H6B  | -1580.09 | 8744.67 | 2007.56 | 54    |
| H6C  | 76.79    | 8886.76 | 2209.09 | 54    |
| H7   | 1025.36  | 8464.83 | 3237.67 | 19    |
| H12  | 1109.78  | 8283.29 | 5746.92 | 19    |
| H14A | 201.37   | 8528.97 | 6843.32 | 57    |
| H14B | -1475.15 | 8377.66 | 6988.87 | 57    |
| H14C | -942.36  | 8489.11 | 6243.64 | 57    |
| H15A | -1387.88 | 6821.66 | 6968.83 | 45    |
| H15B | -1419.43 | 7435.16 | 7465.49 | 45    |
| H15C | 47.77    | 7022.25 | 7373.27 | 45    |
| H16  | 405.64   | 6411.84 | 6375.83 | 23    |
| H17  | 1835.47  | 6027.17 | 5519.21 | 21    |

| <b>Atom</b> | <b>x</b> | <b>y</b> | <b>z</b> | <b>U(eq)</b> |
|-------------|----------|----------|----------|--------------|
| H20         | 868.21   | 5694.37  | 4302.1   | 29           |
| H21         | 542.84   | 4565.09  | 4189.55  | 39           |
| H22         | 2555.35  | 3872.32  | 4103.53  | 42           |
| H23         | 4898.33  | 4312.2   | 4137.69  | 37           |
| H24         | 5232.62  | 5445.76  | 4249.42  | 26           |
| H26         | 5394.5   | 6847.41  | 3304.64  | 35           |
| H27         | 7783.75  | 7210.34  | 3226.77  | 48           |
| H28         | 9122.26  | 7429.53  | 4188.99  | 52           |
| H29         | 8030.73  | 7322.2   | 5224.15  | 51           |
| H30         | 5622.98  | 6972.24  | 5300.94  | 35           |
| H31         | 3838.31  | 8595.77  | 3335.93  | 18           |
| H34         | 5106.68  | 9197.06  | 2857.58  | 25           |
| H36A        | 6877.59  | 10395.76 | 1254.85  | 65           |
| H36B        | 8203.89  | 10367.56 | 1771.42  | 65           |
| H36C        | 6865.13  | 10853.41 | 1900.1   | 65           |
| H37         | 8232.58  | 10594.21 | 2875.29  | 33           |
| H38         | 8476.57  | 10465.72 | 4011.4   | 30           |
| H41         | 8742.45  | 10321.51 | 5008.81  | 27           |
| H42         | 8864.68  | 10254.63 | 6155.03  | 28           |
| H44A        | 7795.25  | 10432.27 | 7207.35  | 46           |
| H44B        | 9030.69  | 9877.71  | 7221.44  | 46           |
| H44C        | 7823.29  | 9897.46  | 7789.26  | 46           |
| H45         | 5470.38  | 8987.26  | 6137.72  | 23           |
| H48         | 3982.3   | 8468.65  | 5625.51  | 18           |

## 7. References

1. H. Shen, X. Zhang, Q. Liu, J. Pan, W. Hu, Y. Xiong, X. M. Zhu, *Tetrahedron Lett.*, 2015, **56**, 5628.
2. A. L. Reiff, E. M. Garcia-Frutos, J. M. Gil, O. P. Anderson, L. S. Hegedus, *Inorg. Chem.*, 2005, **44**, 9162.
3. (a) J. C. Corey, C. S. John, Martha C. Ohmsted, L. S. Chang, *J. Organomet. Chem.*, 1986, **304**, 93; (b) K. Kanno, S. Hirose, S. Kyushin, *Heteroatom Chem.*, 2018, **29**: e21478.
4. I. Hisaki, S. Nakagawa, N. Tohnai, M. Miyata, *Angew. Chem. Int. Ed.*, 2015, **54**, 3008.
5. A. Krasovskiy, P. Knochel, *Angew. Chem. Int. Ed.*, 2004, **43**, 3333.
6. H. X. Zheng, X. H. Shan, J. P. Qu, Y. B. Kang, *Org. Lett.*, 2017, **19**, 5114.
7. S. Bartoli, A. Cipollone, A. Squarcia, A. Madami, D. Fattori, *Synthesis*, 2009, **8**, 1305.
8. N. Miyaura, A. Suzuki, *Chem. Rev.*, 1995, **95**, 2457.
9. (a) Y. H. Ma, B. L. Wang, L. Zhang, Z. M. Hou, *J. Am. Chem. Soc.*, 2016, **138**, 3663; (b) Y. F. Dong, Y. Takata, Y. Yoshigoe, K. Sekine, Y. Kuninobu, *Chem. Commun.*, 2019, **55**, 13303.
10. J. T. Reeves, D. R. Fandrick, Z. L. Tan, J. H. J. Song, H. Lee, N. K. Yee, C. H. Senanayake, *Org. Lett.*, 2010, **12**, 4388.
11. B. S. Wei, D. C. Zhang, Y. H. Chen, A. W. Lei, P. Knochel, *Angew. Chem. Int. Ed.*, 2019, **58**, 15631.
12. S. H. Wadumethrige, R. Rathore, *Org. Lett.*, 2008, **10**, 5139.
13. SIR2008: M. C. Burla, R. Caliendo, M. Camalli, B. Carrozzini, G. L. Cascarano, L. De Caro, C. Giacovazzo, G. Polidori, D. Siliqi and R. Spagna, *J. Appl. Crystallogr.*, 2007, **40**, 609–613.
14. DIRDIF99: P. T. Beurskens, G. Admiraal, G. Beurskens, W. P. Bosman, R. de Gelder, R. Israel and J. M. M. Smits, The DIRDIF-99 program system; Technical Report of the Crystallography Laboratory; University of Nijmegen, Nijmegen, The Netherlands, 1999.
15. D. T. Cromer and J. T. Waber, International Tables for X-ray Crystallography; Kynoch Press: Birmingham, U.K., 1974, Vol. 4
16. Olex2 program package: O. V. Dolomanov, L. J. Bourhis, R. J. Gildea, J. A. K. Howard and H. Puschmann, *J. Appl. Crystallogr.*, 2009, **42**, 339.

## 8. NMR Spectra

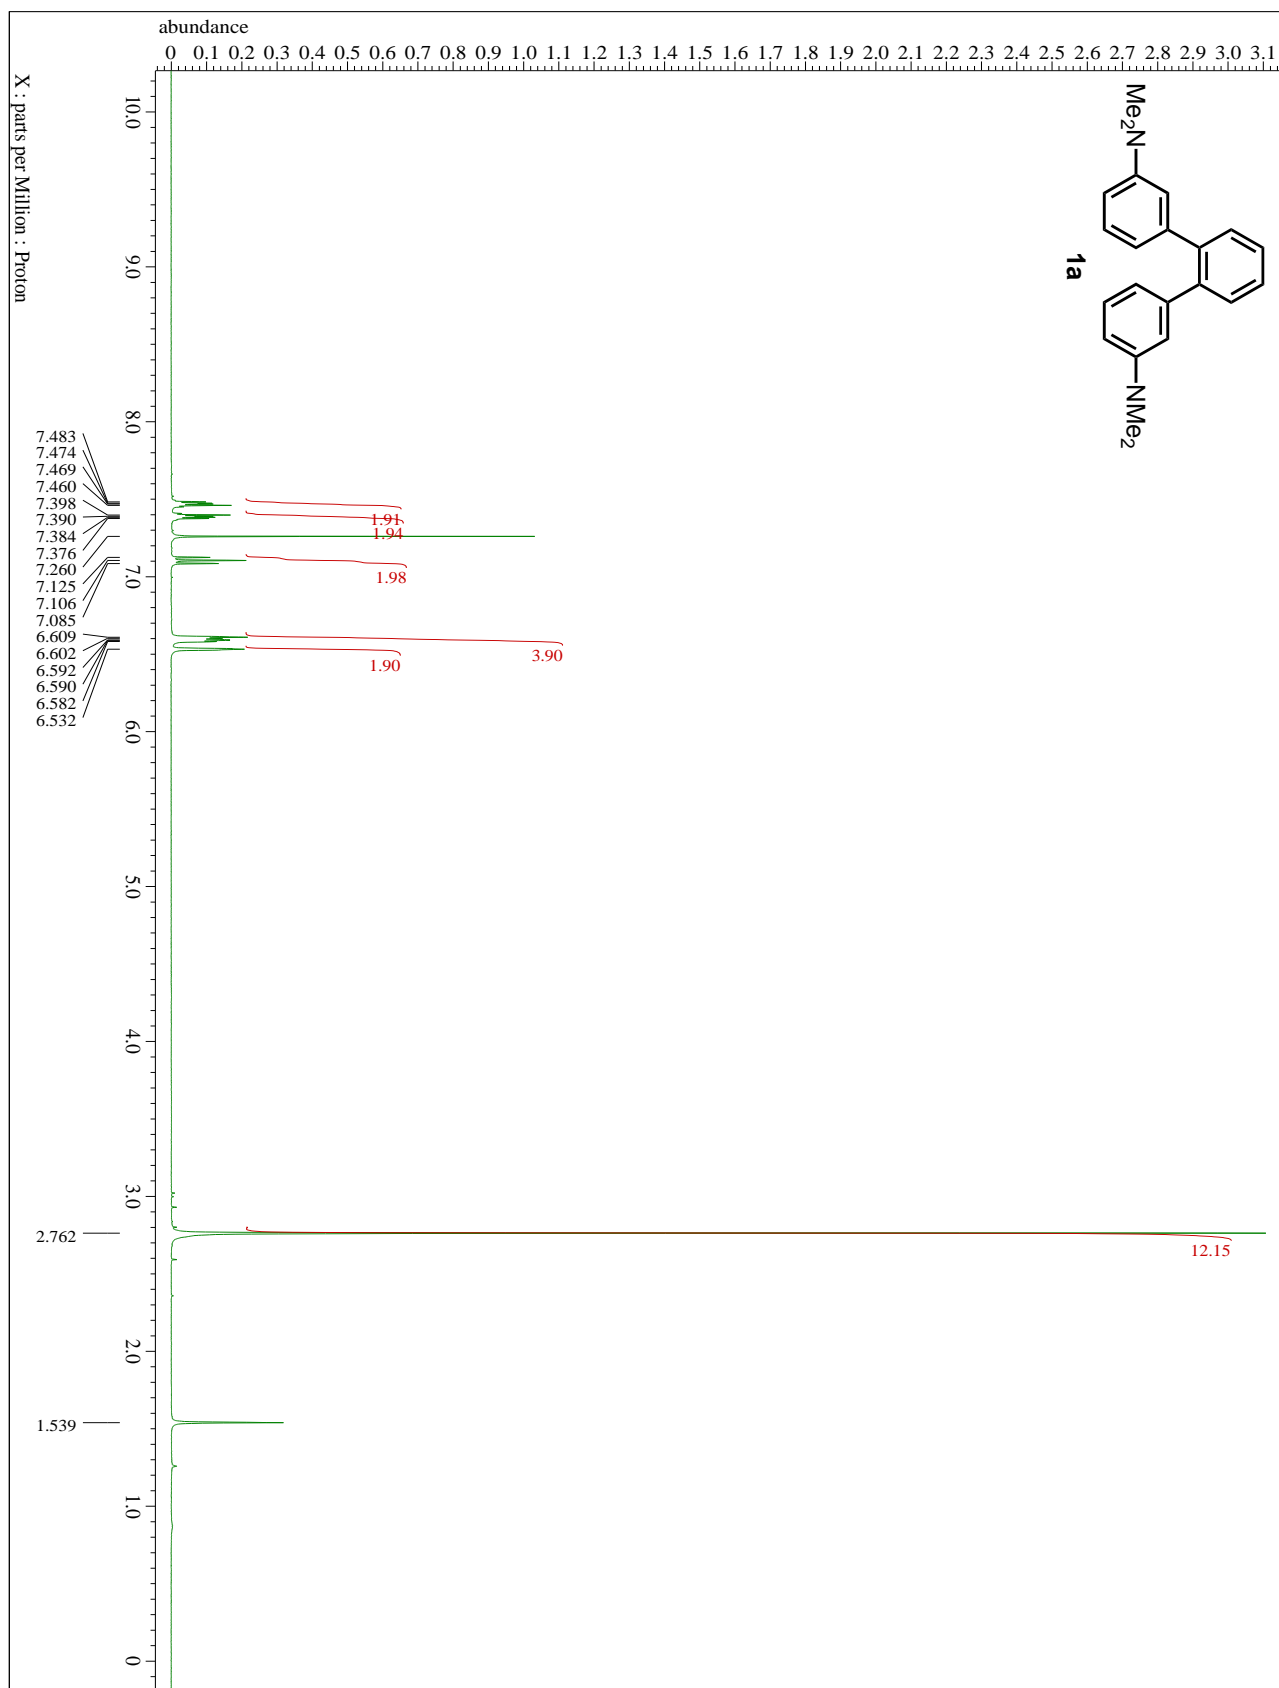

Figure S3.  $^1\text{H}$  NMR of **1a** in  $\text{CDCl}_3$ .

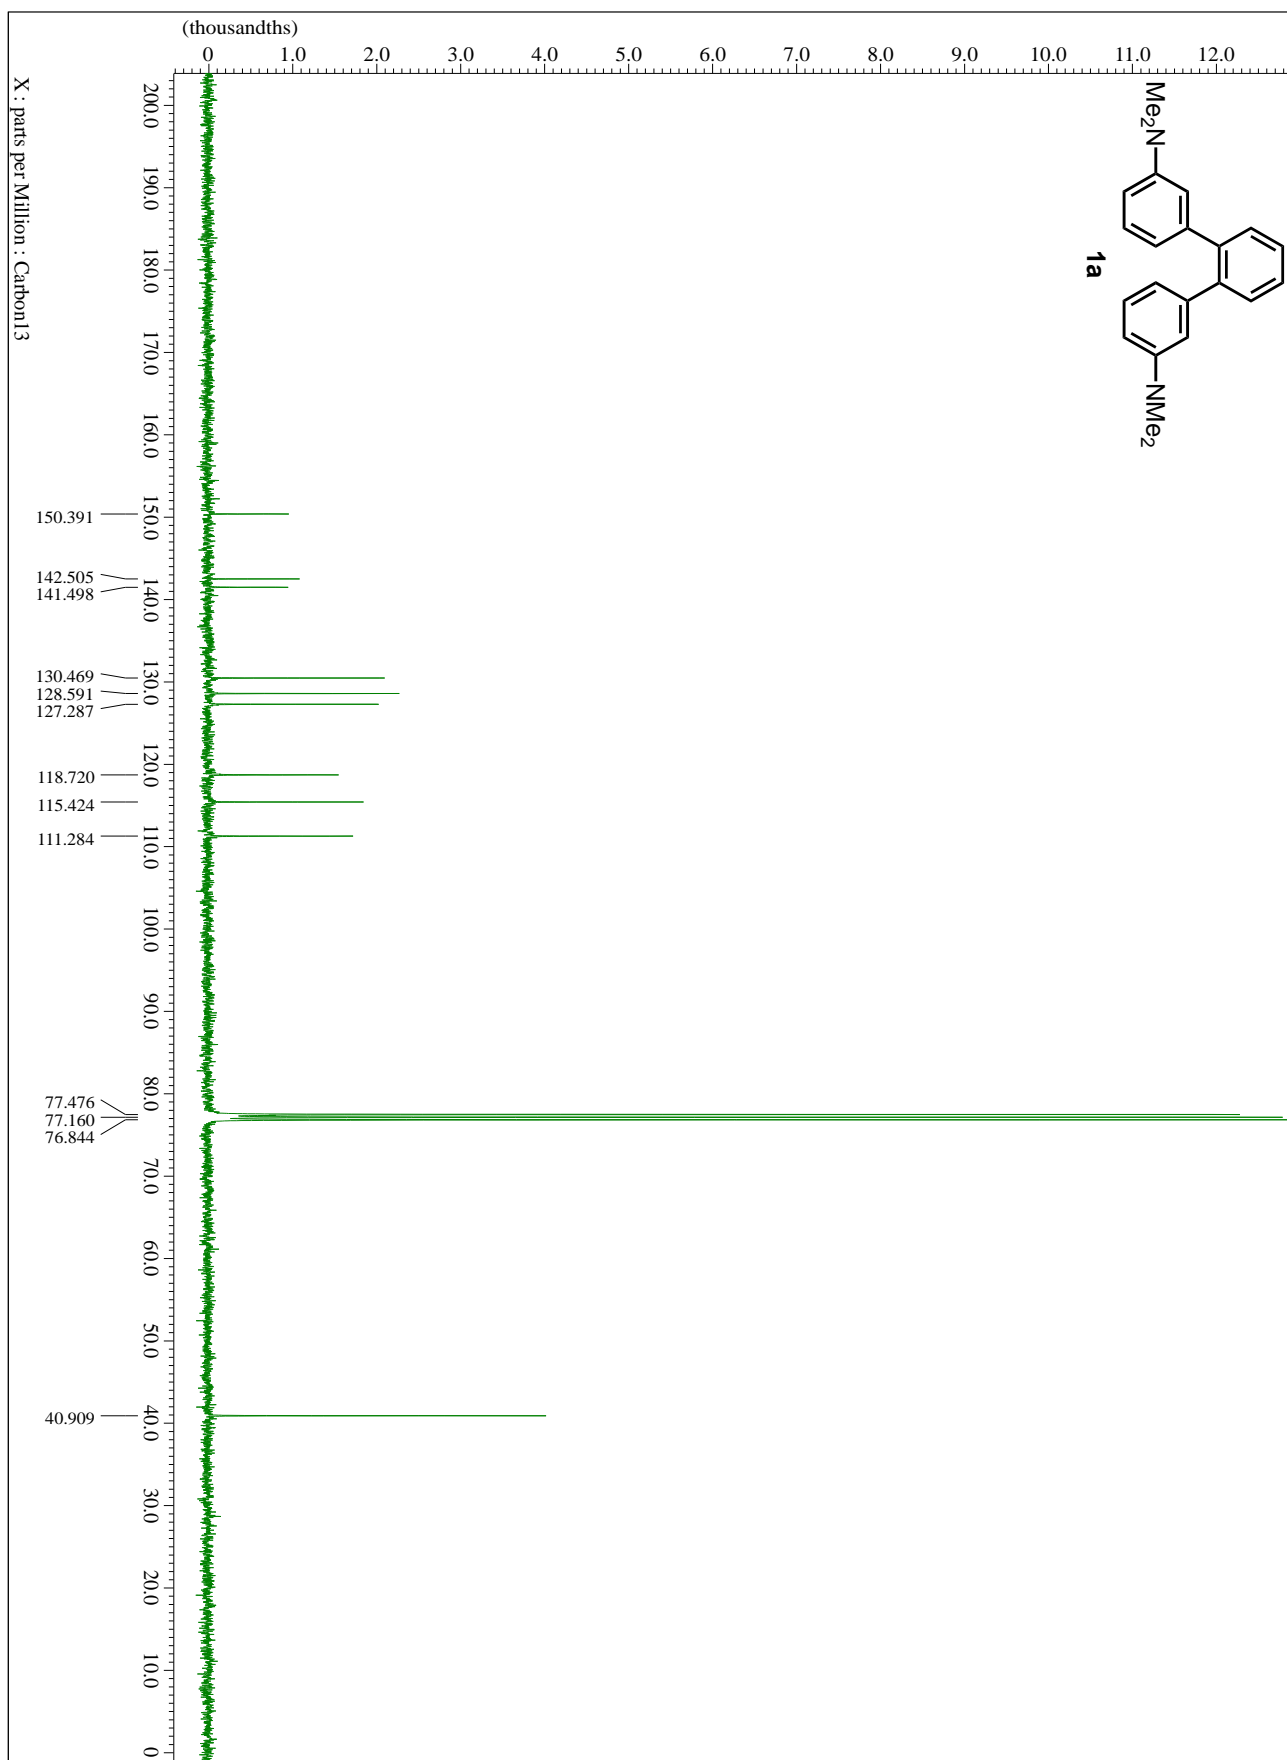

**Figure S4.**  $^{13}\text{C}$  NMR of **1a** in  $\text{CDCl}_3$ .



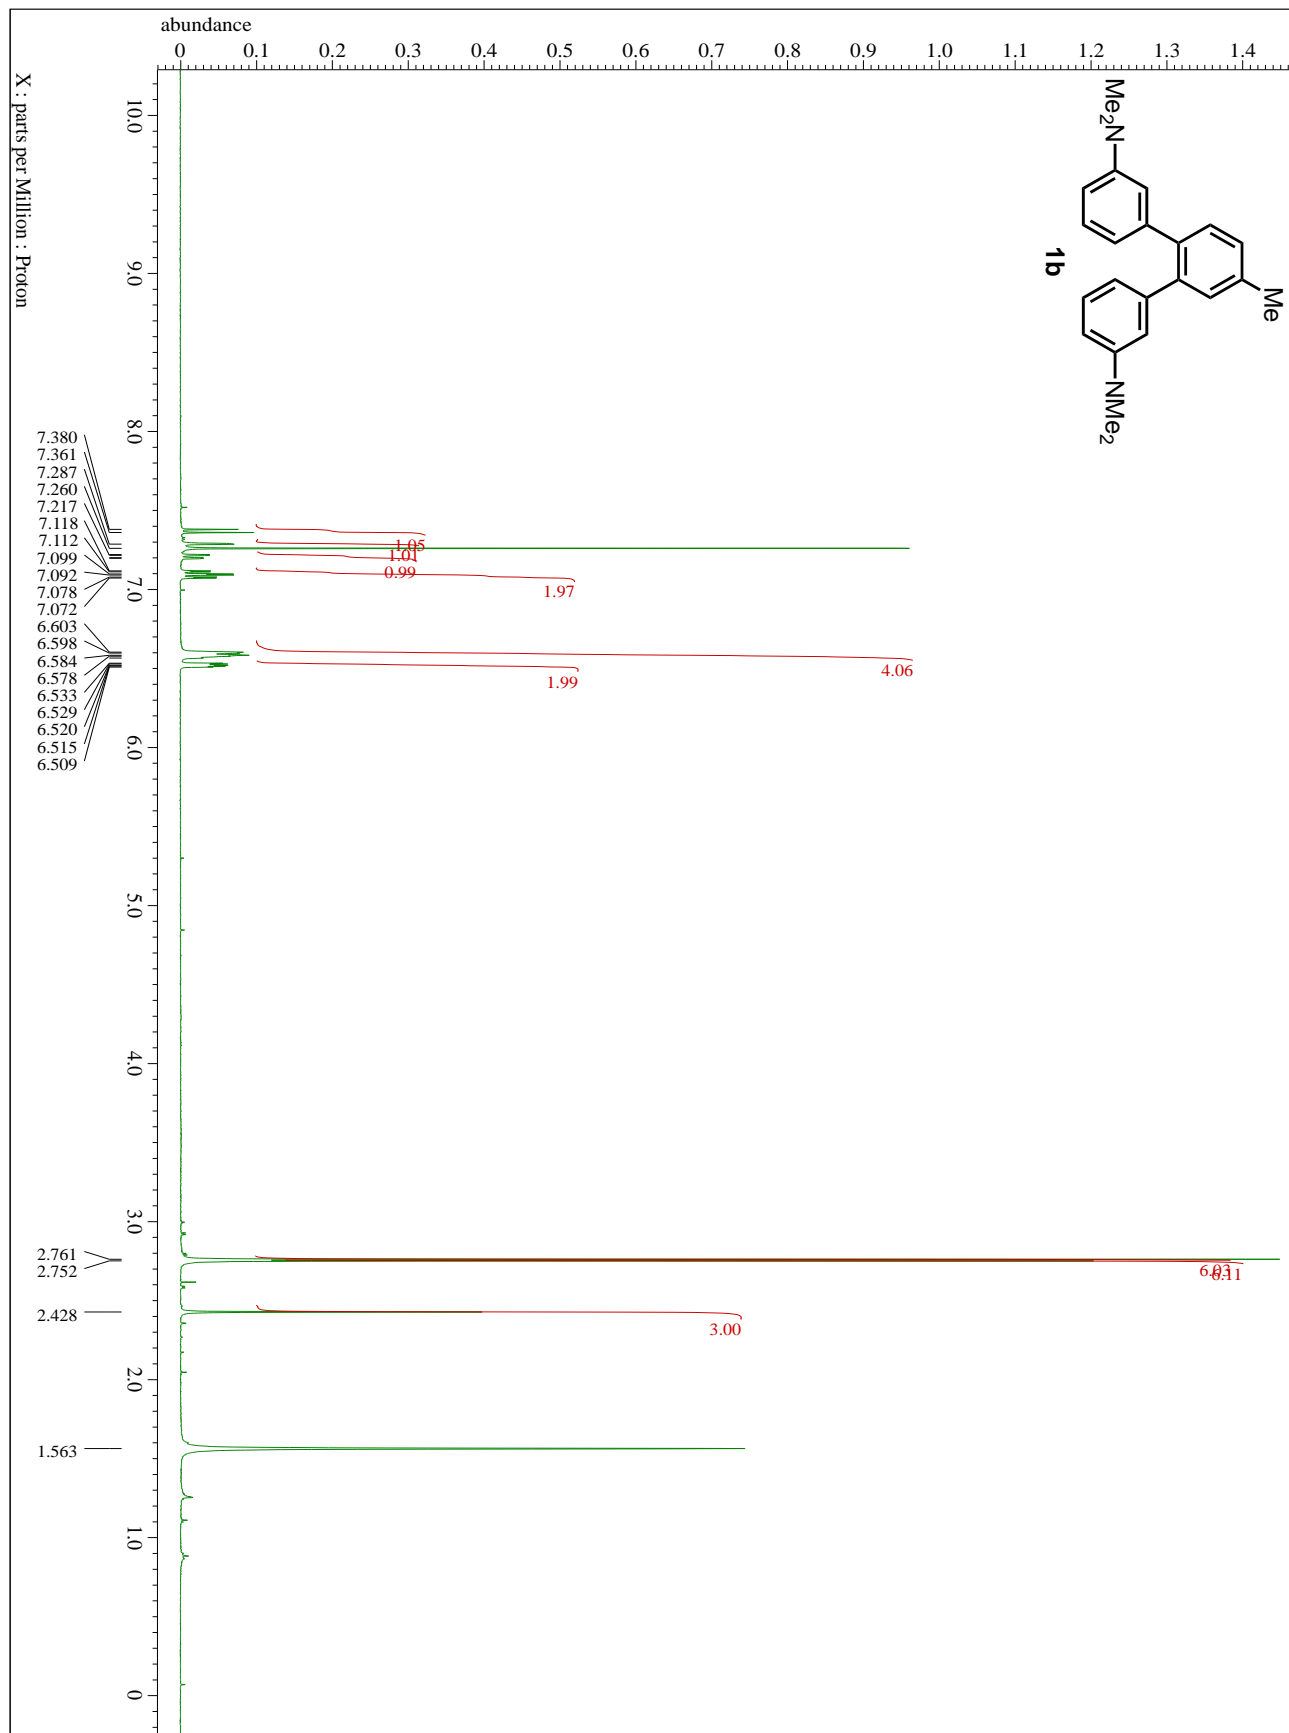

**Figure S5.** <sup>1</sup>H NMR of **1b** in CDCl<sub>3</sub>.

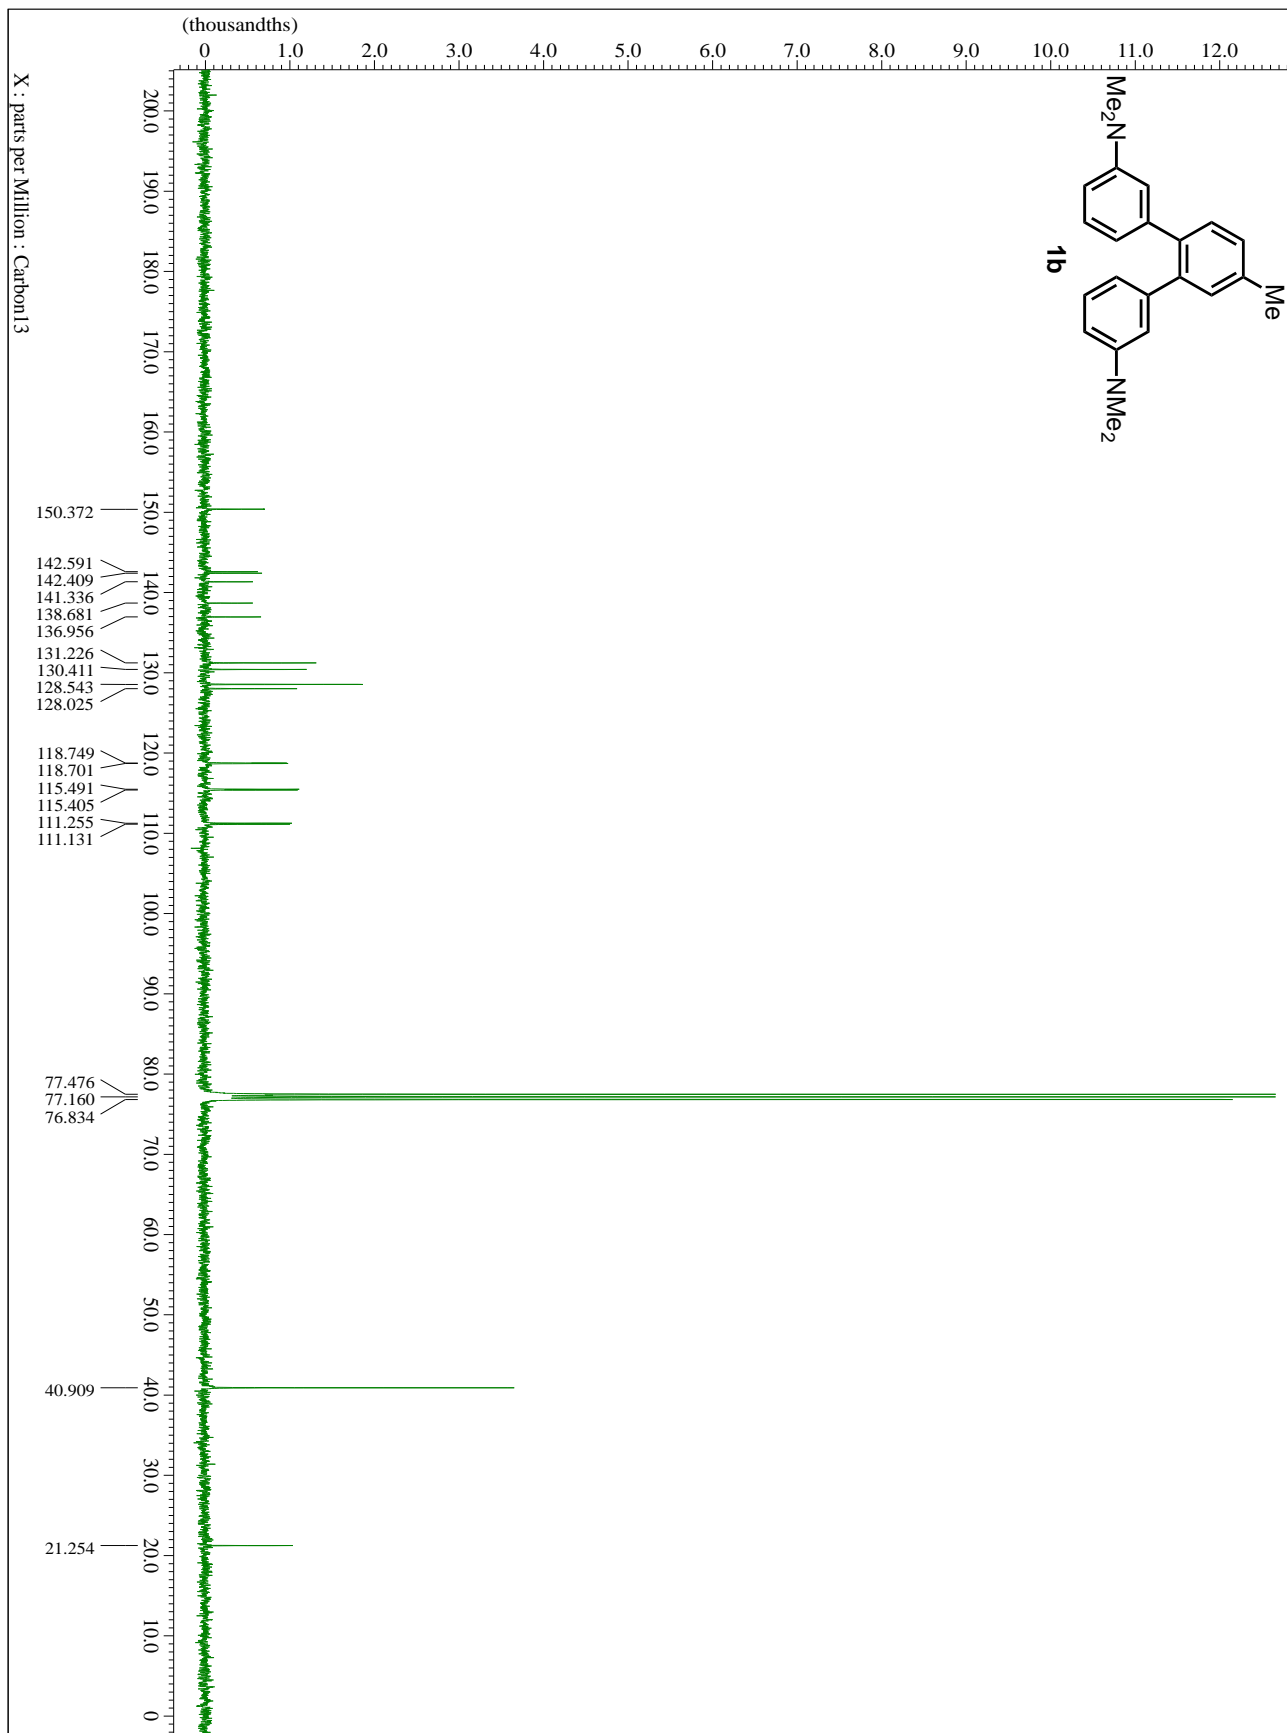

Figure S6.  $^{13}\text{C}$  NMR of **1b** in  $\text{CDCl}_3$ .

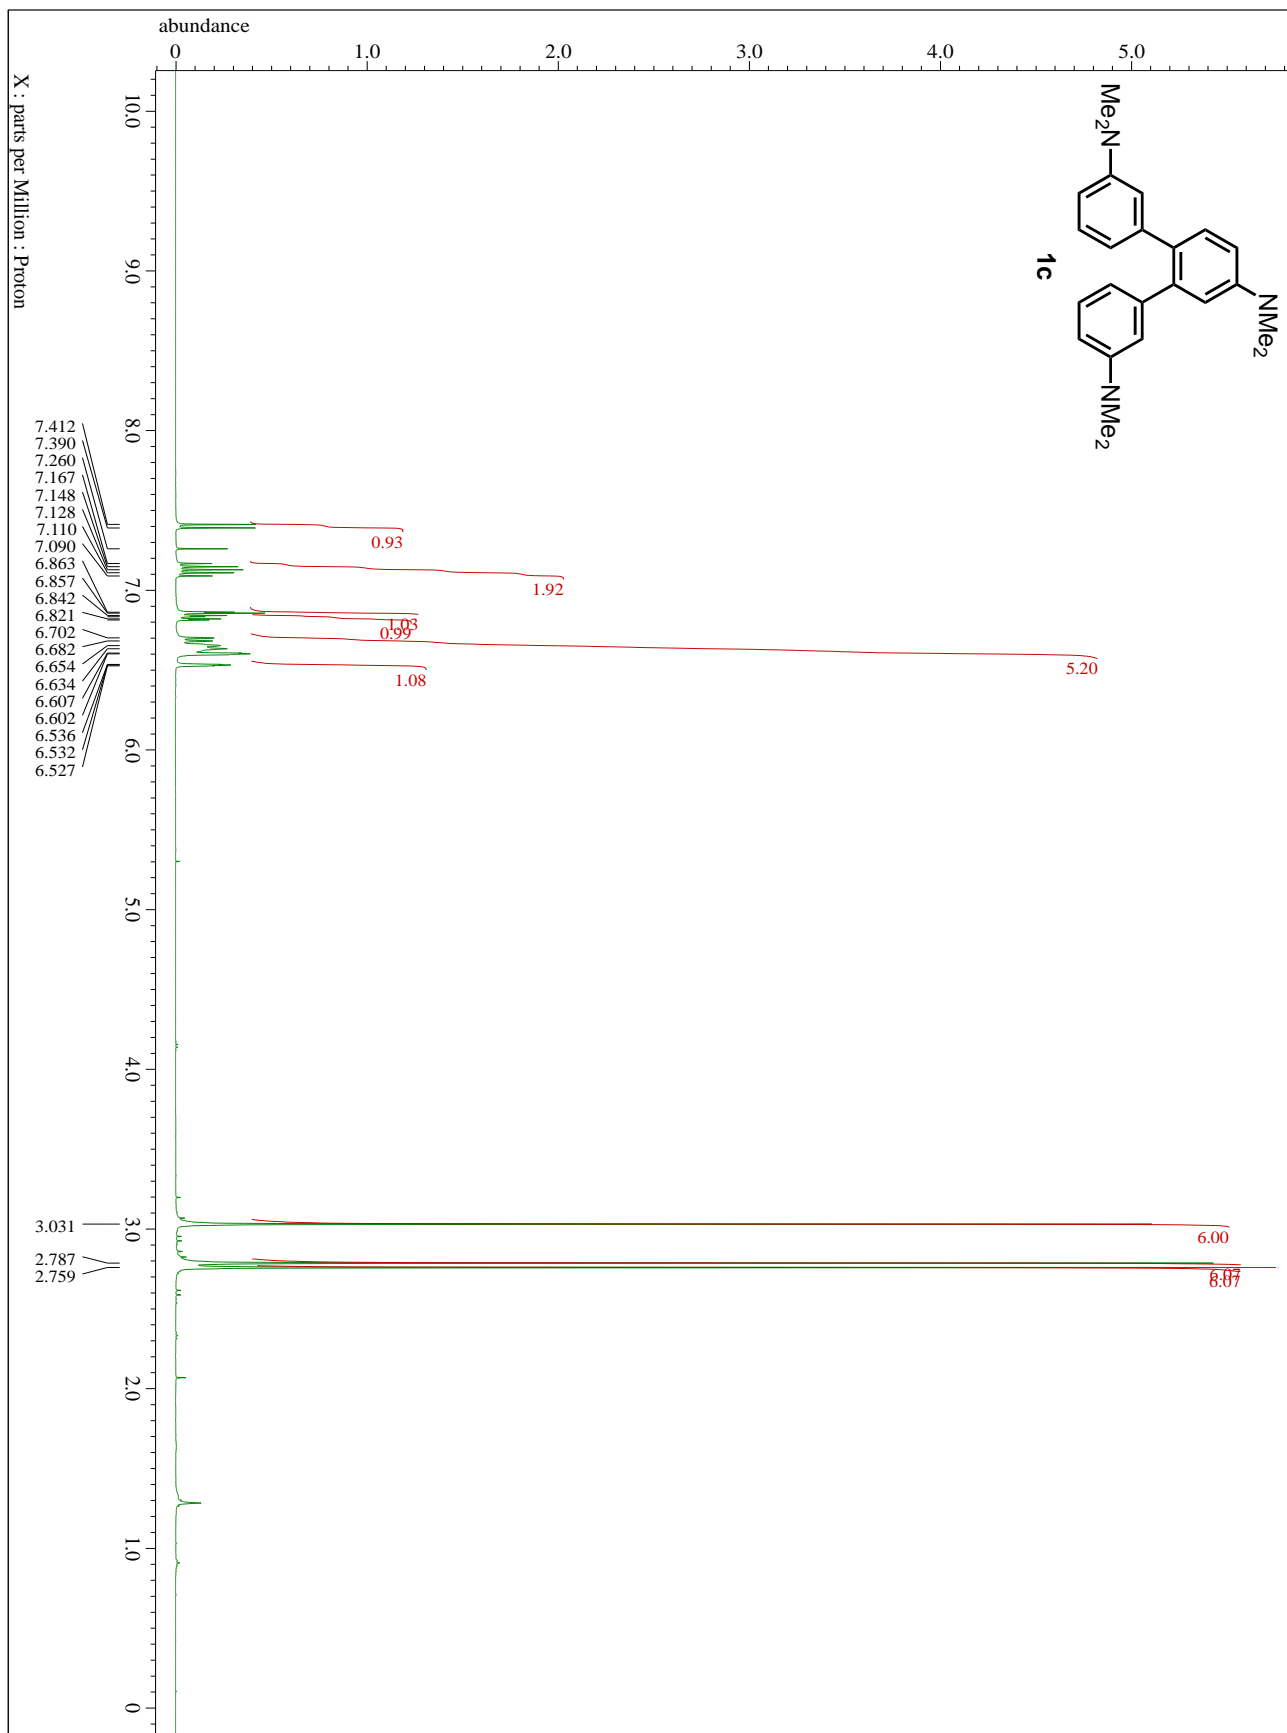

**Figure S7.**  $^1\text{H}$  NMR of **1c** in  $\text{CDCl}_3$ .

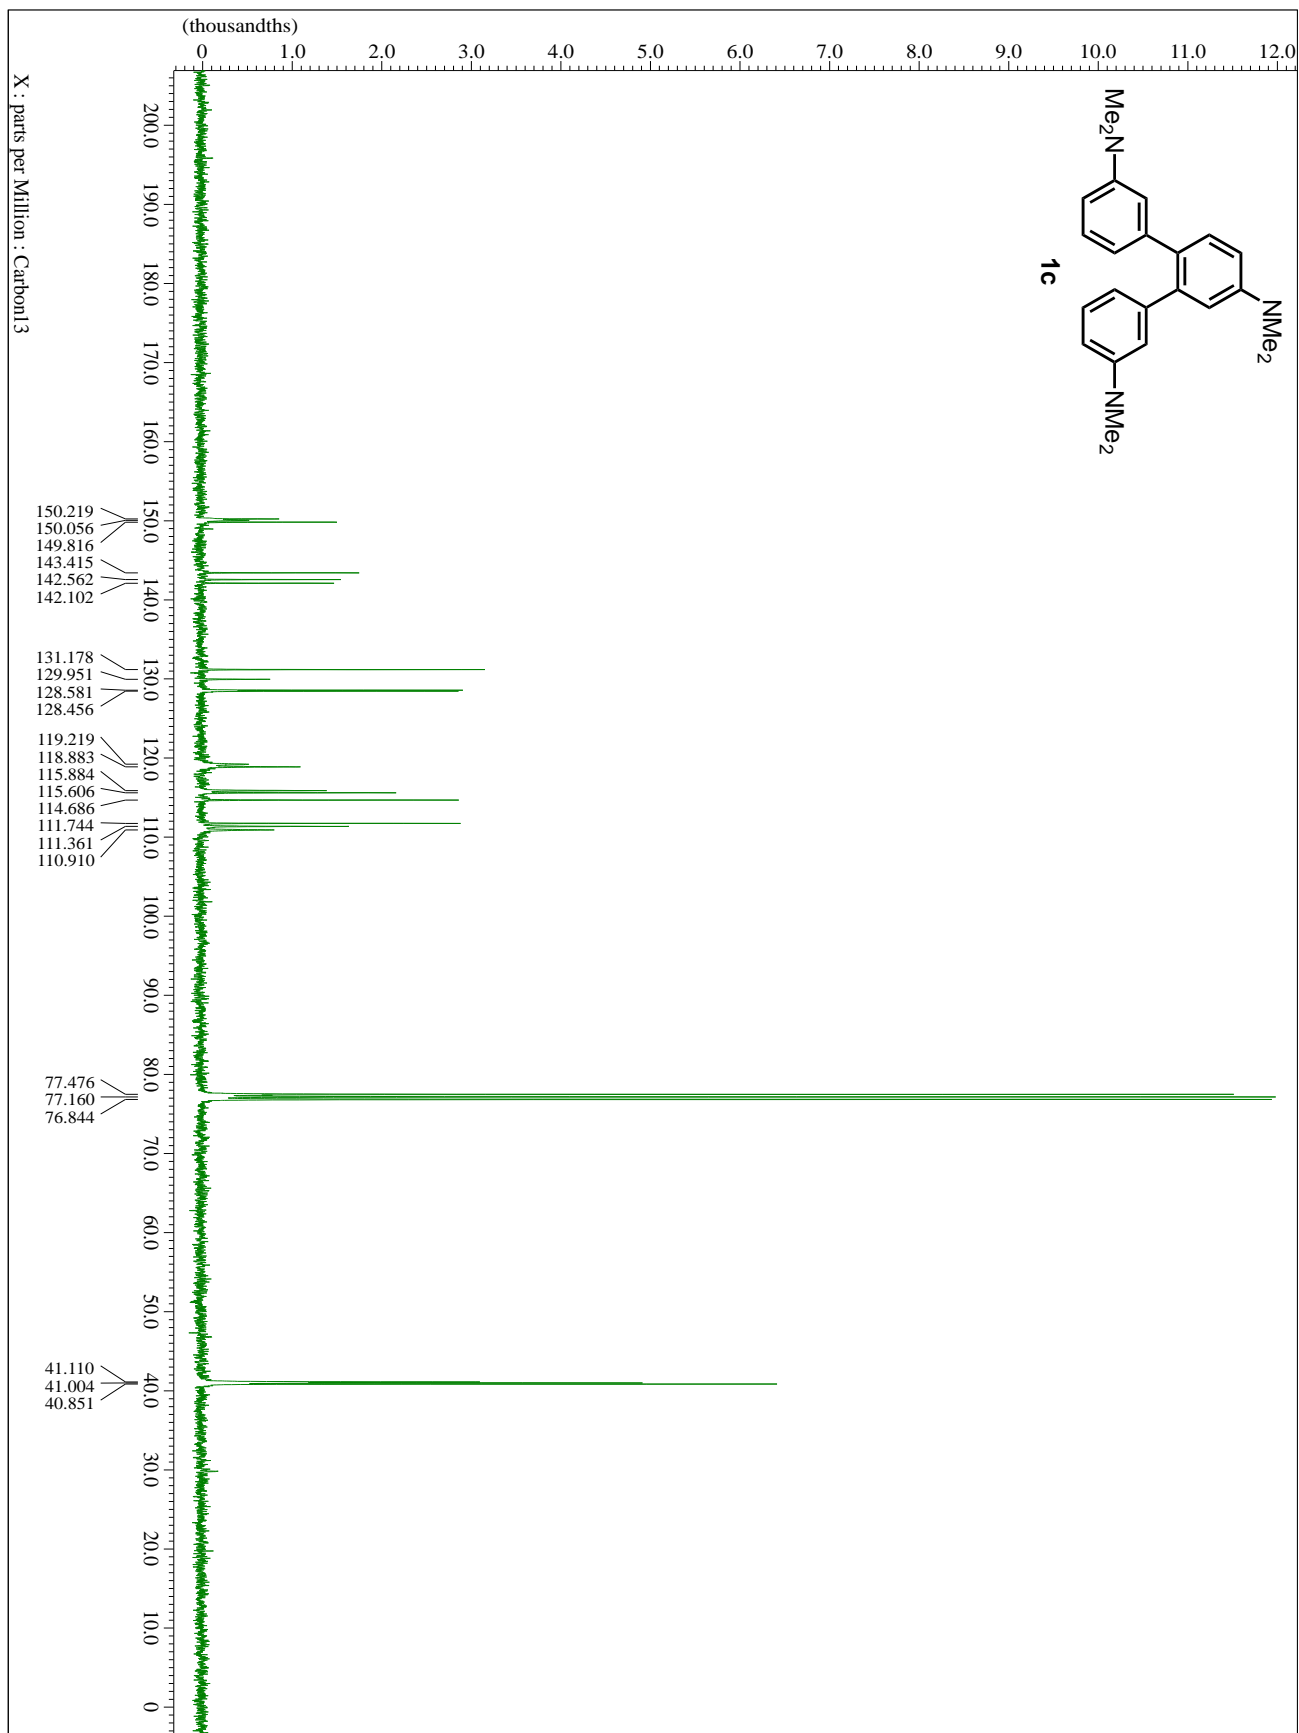

Figure S8. <sup>13</sup>C NMR of 1c in CDCl<sub>3</sub>.

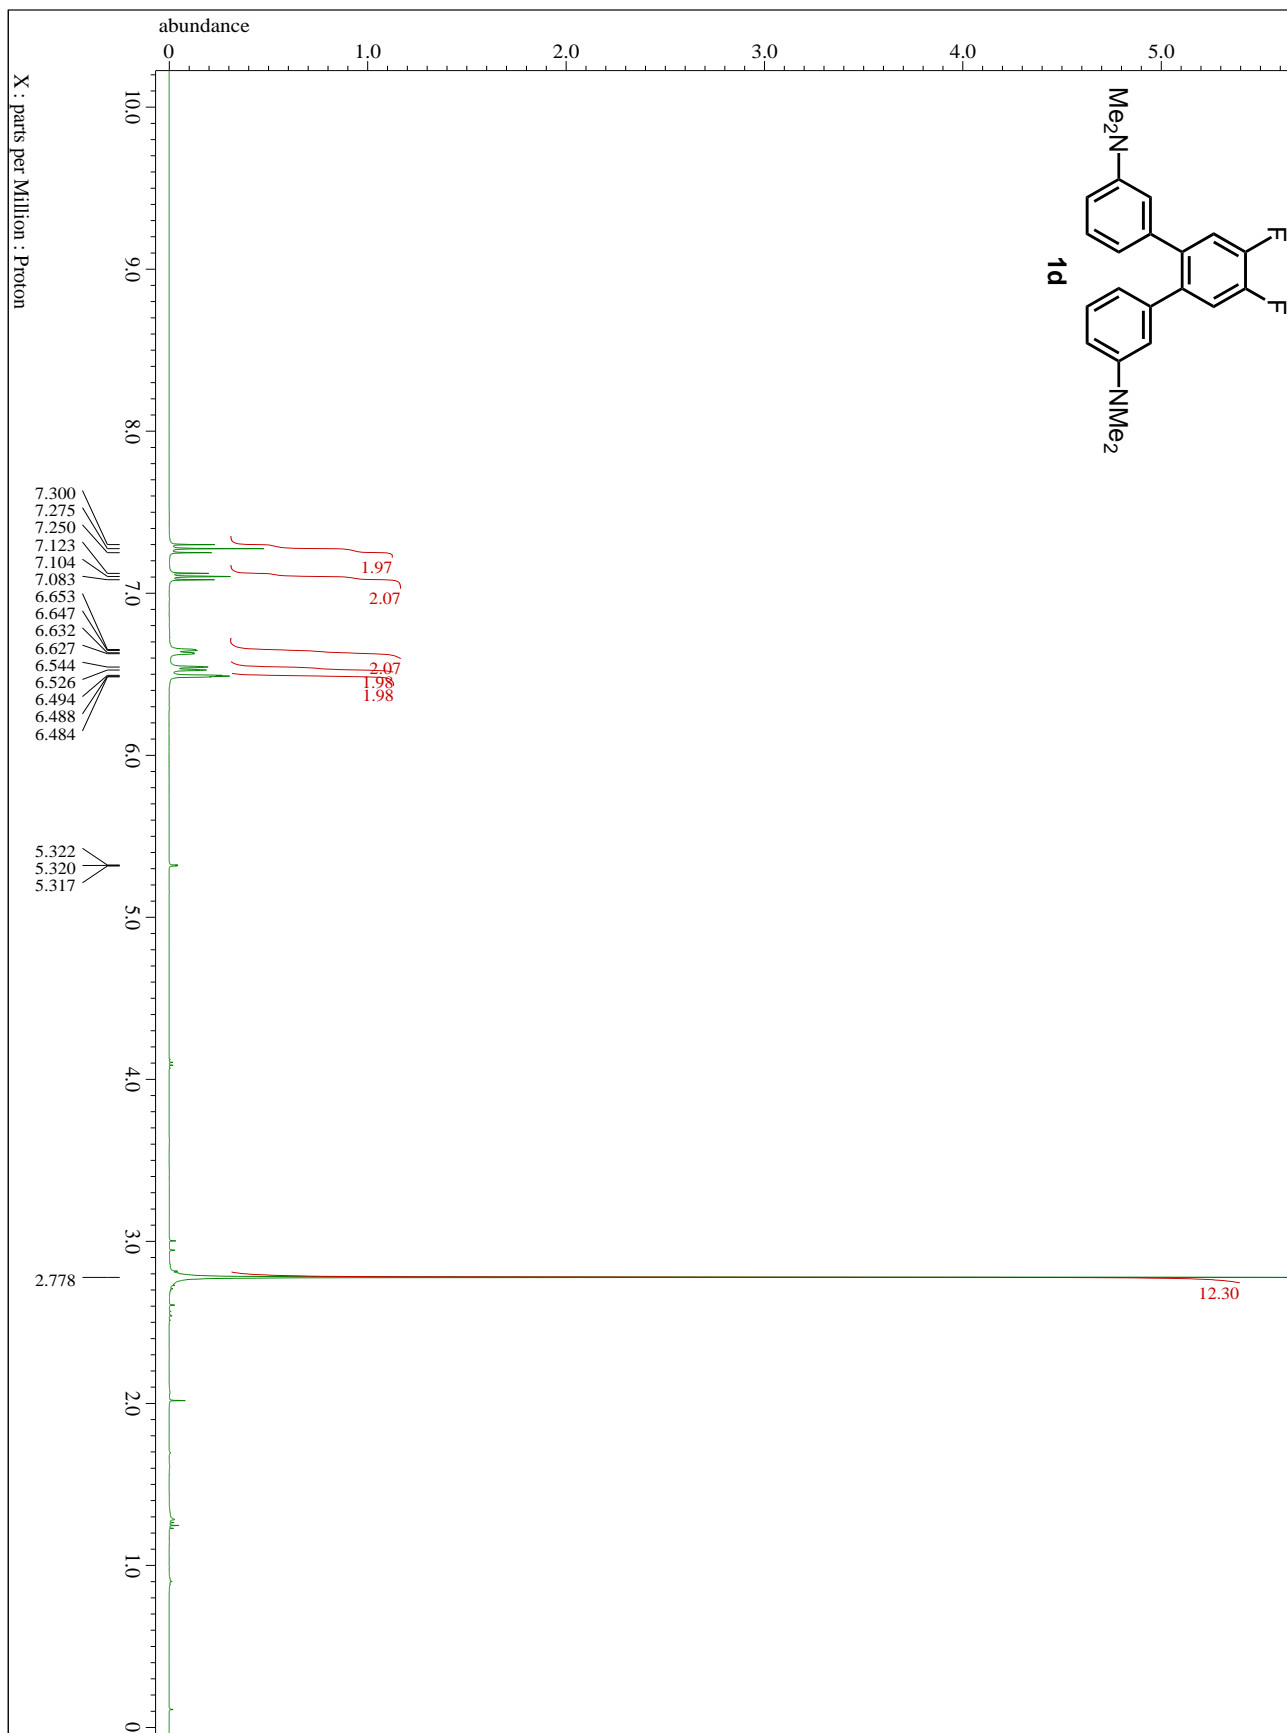

**Figure S9.**  $^1H$  NMR of **1d** in  $CD_2Cl_2$ .

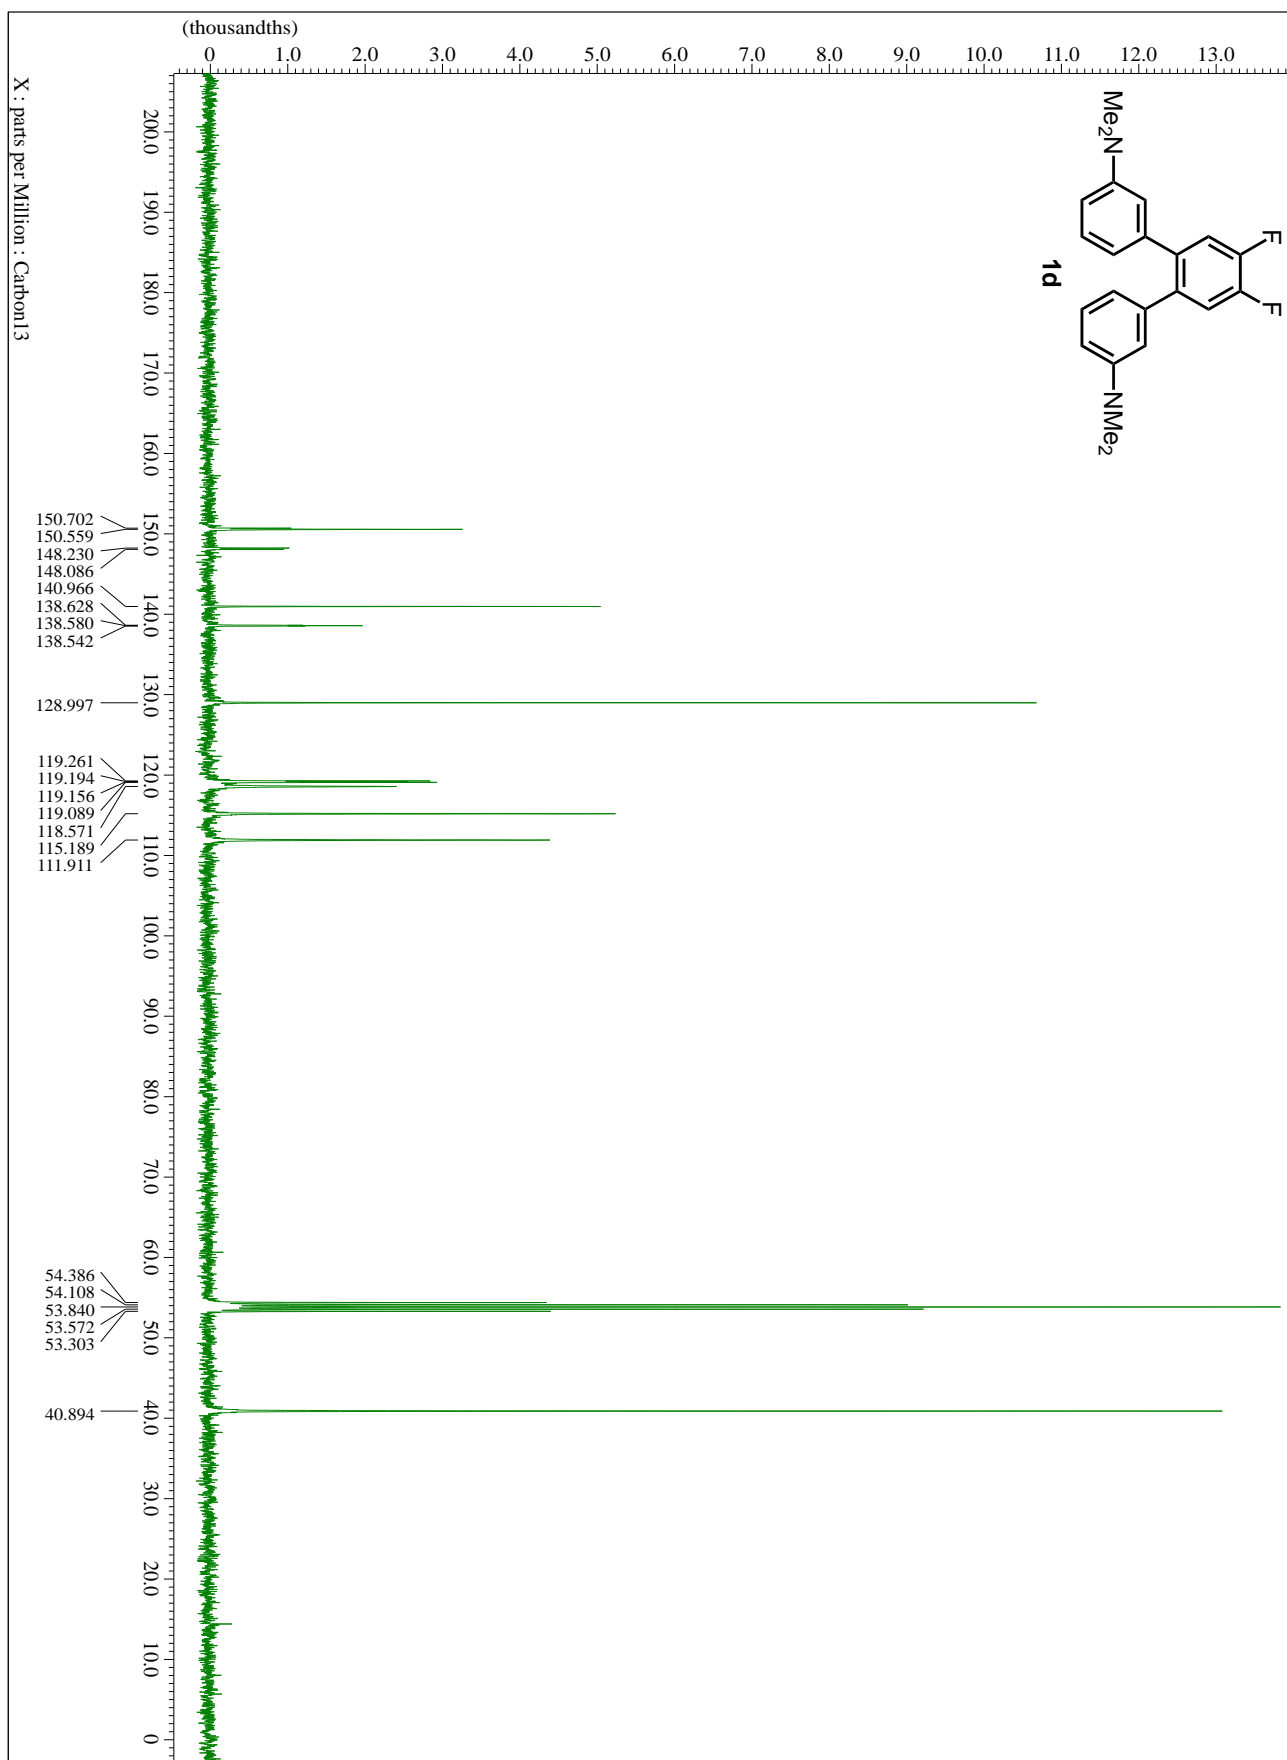

Figure S10. <sup>13</sup>C NMR of **1d** in CD<sub>2</sub>Cl<sub>2</sub>.

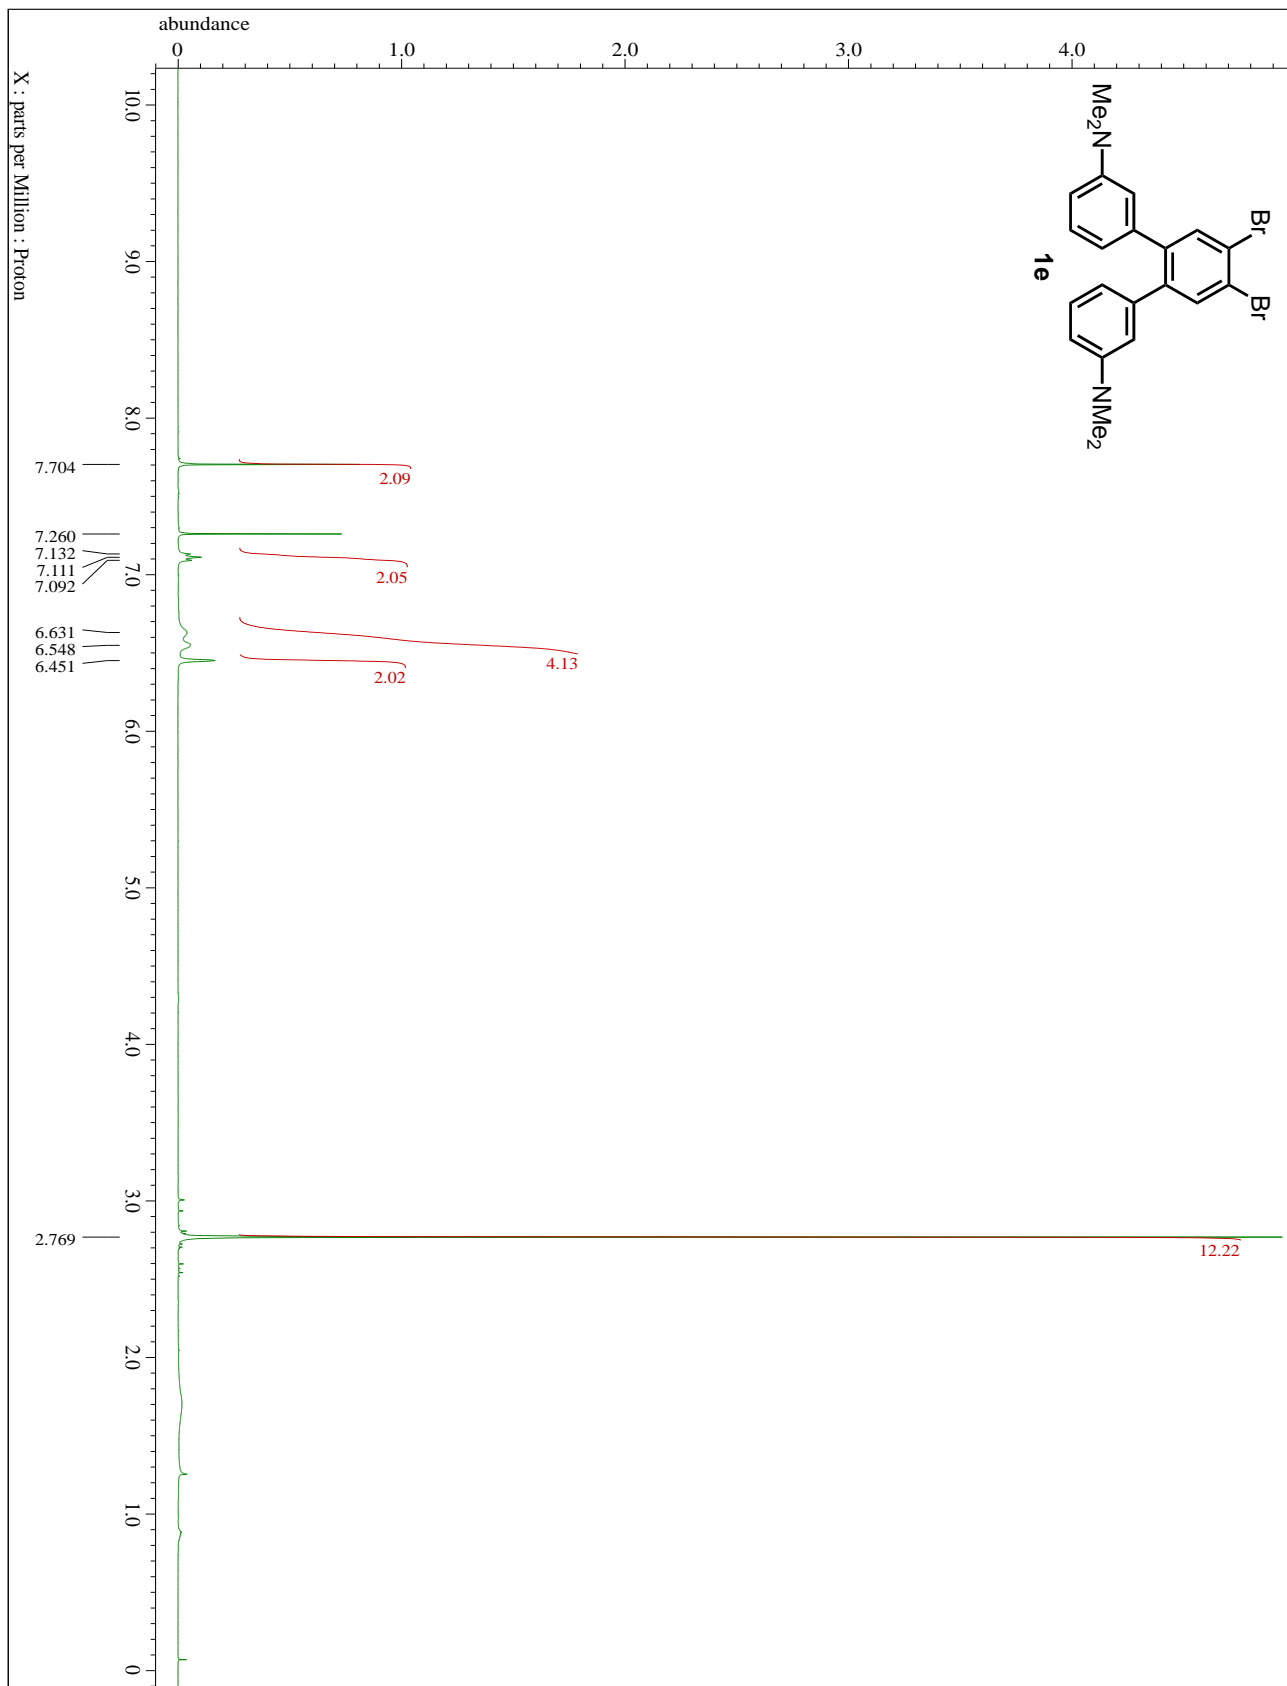

**Figure S11.**  $^1\text{H}$  NMR of **1e** in  $\text{CDCl}_3$ .

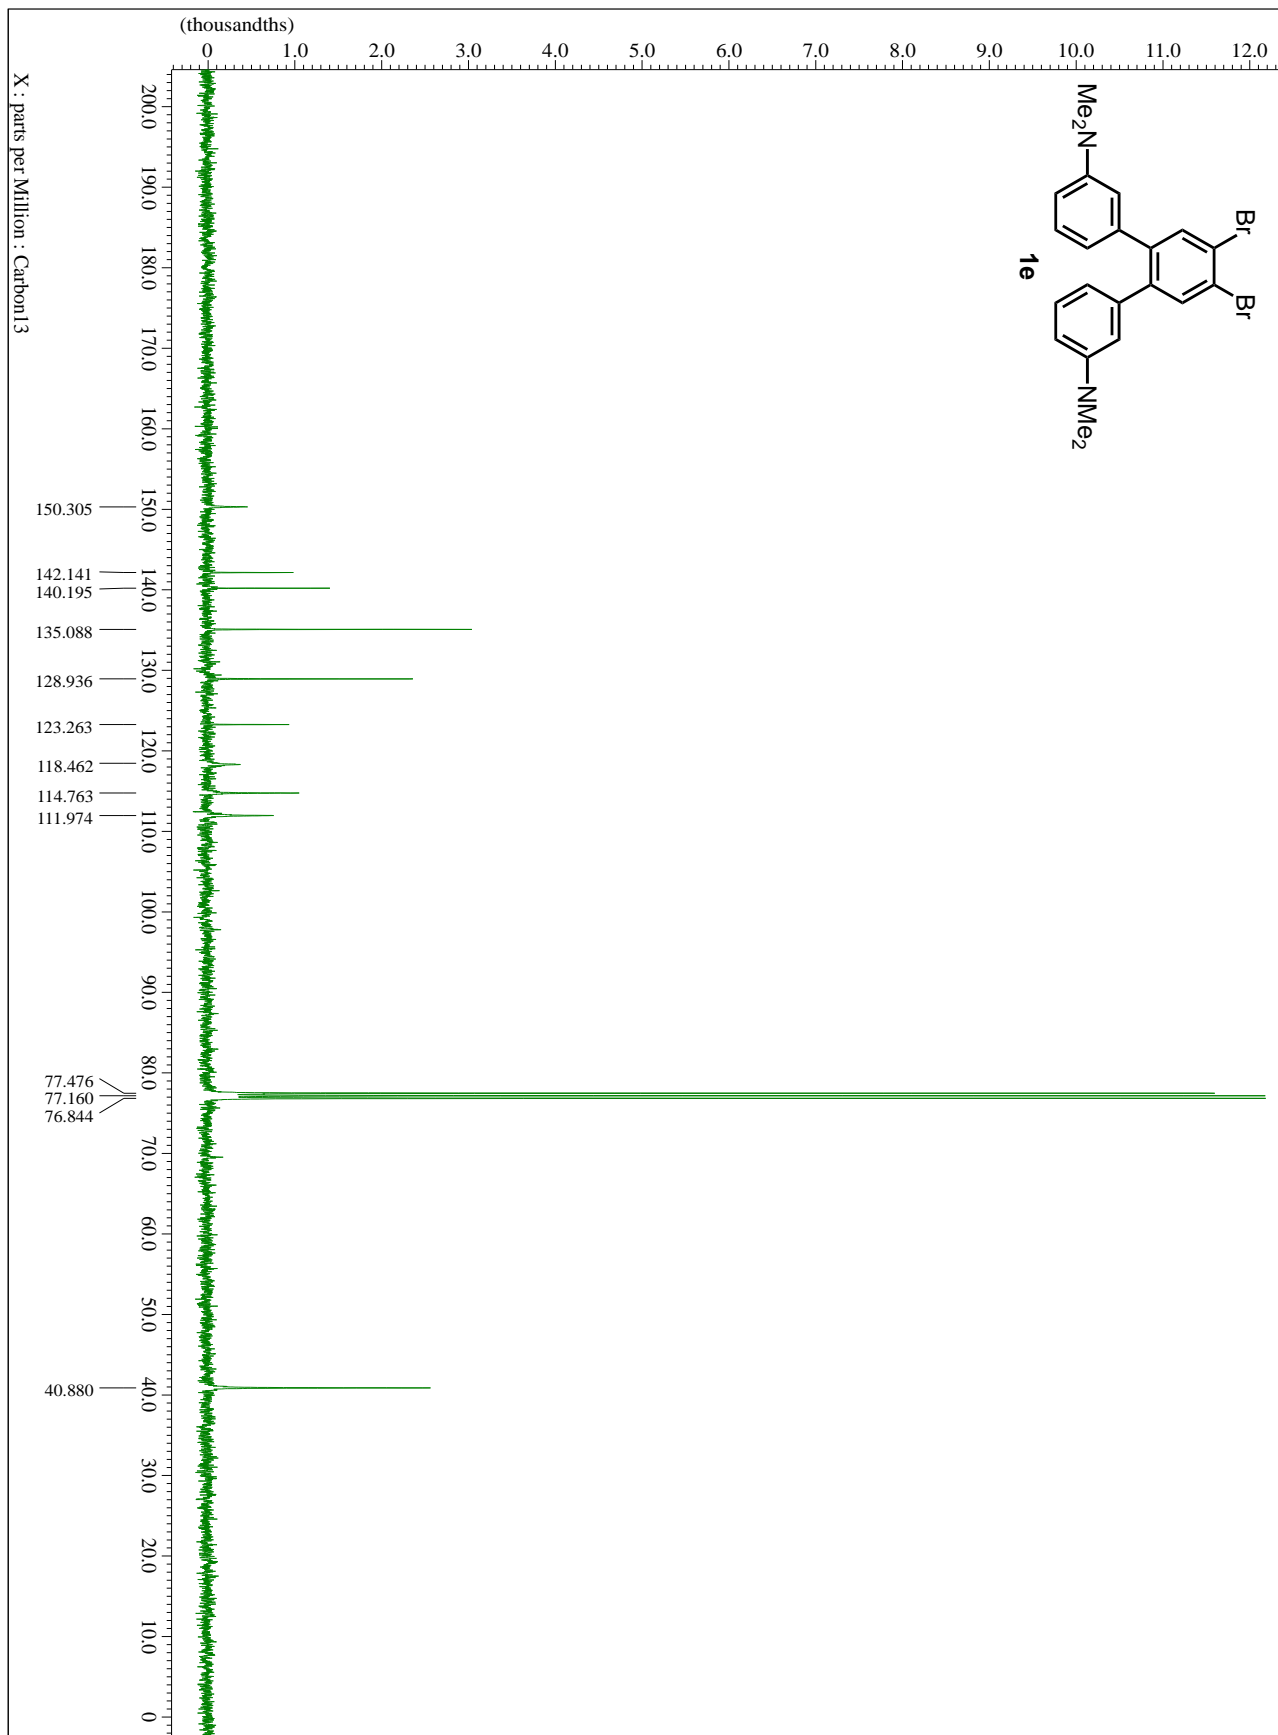

Figure S12. <sup>13</sup>C NMR of **1e** in CDCl<sub>3</sub>.



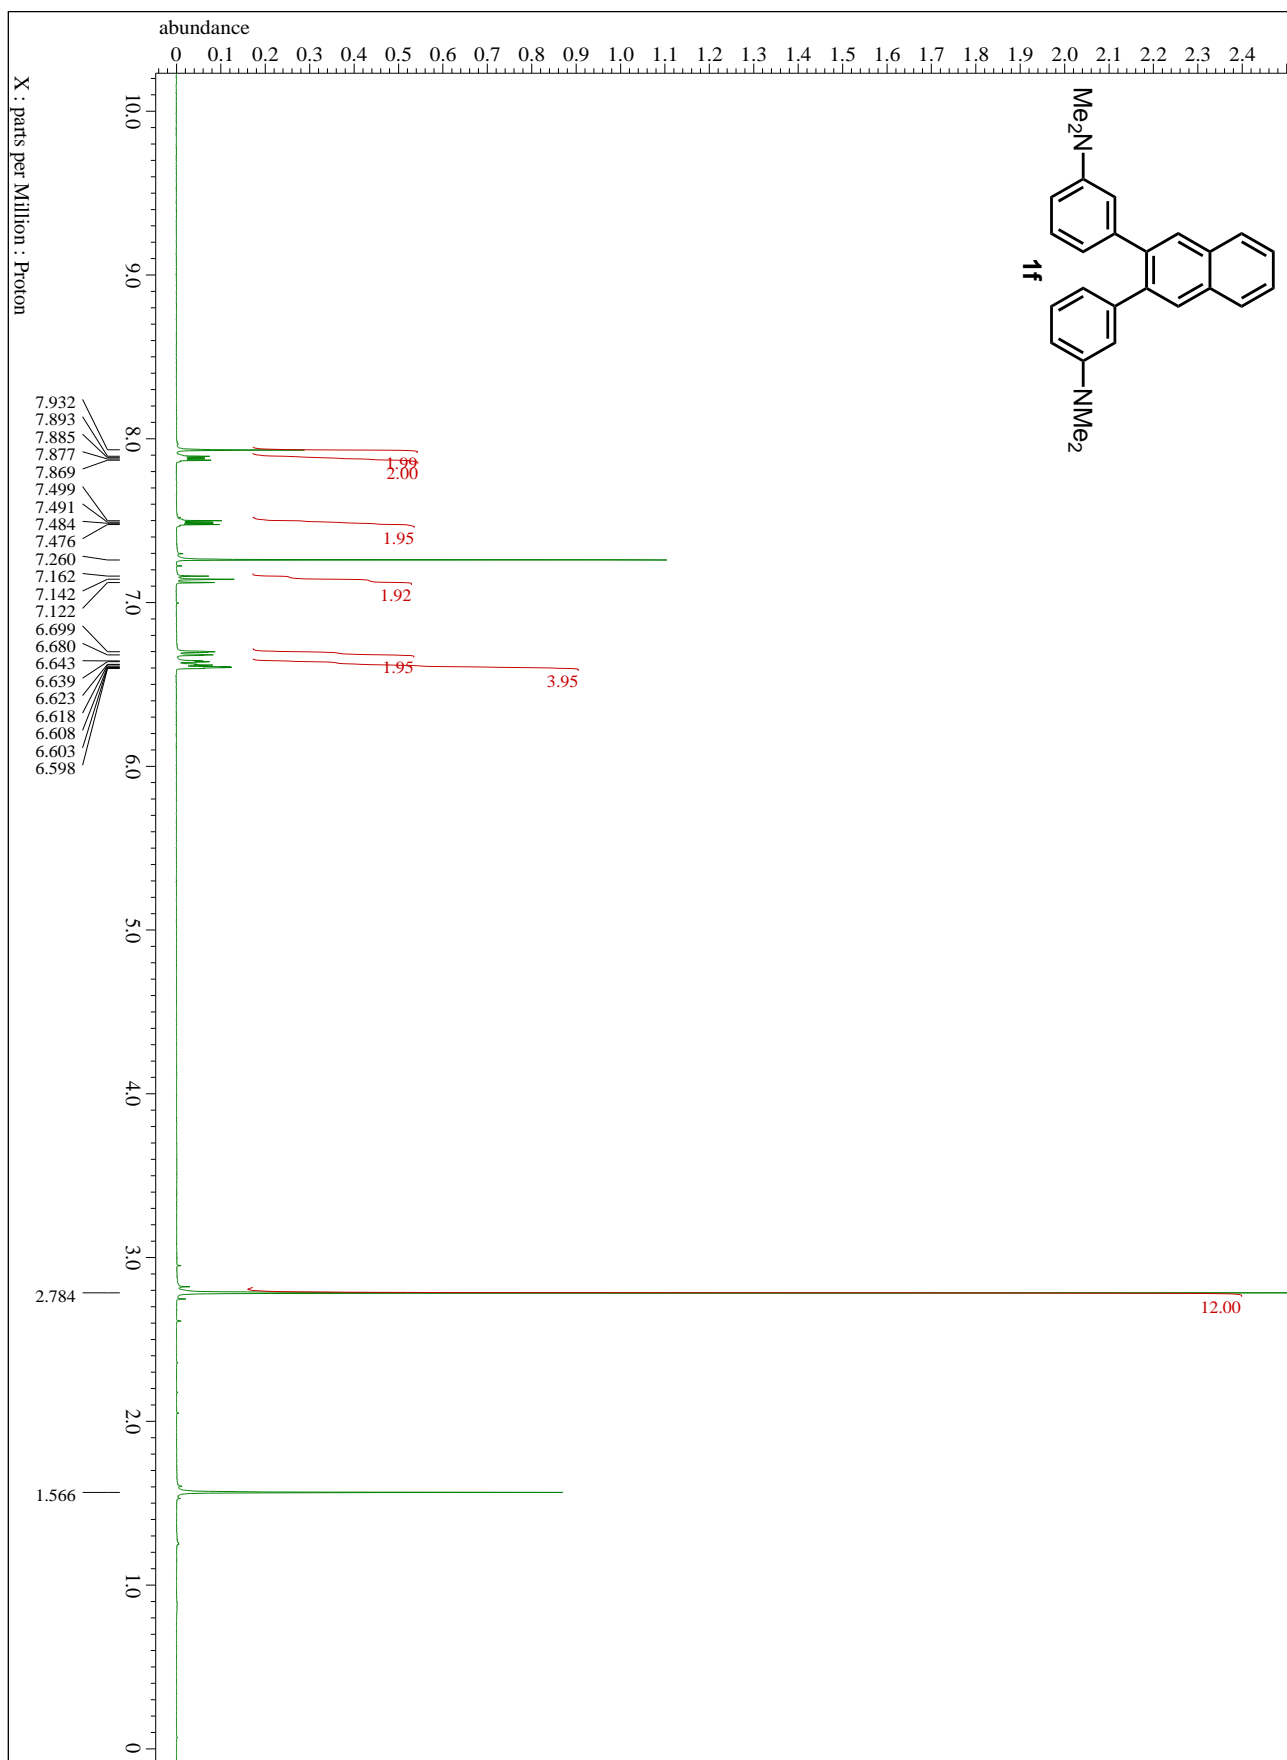

Figure S13.  $^1\text{H}$  NMR of **1f** in  $\text{CDCl}_3$ .

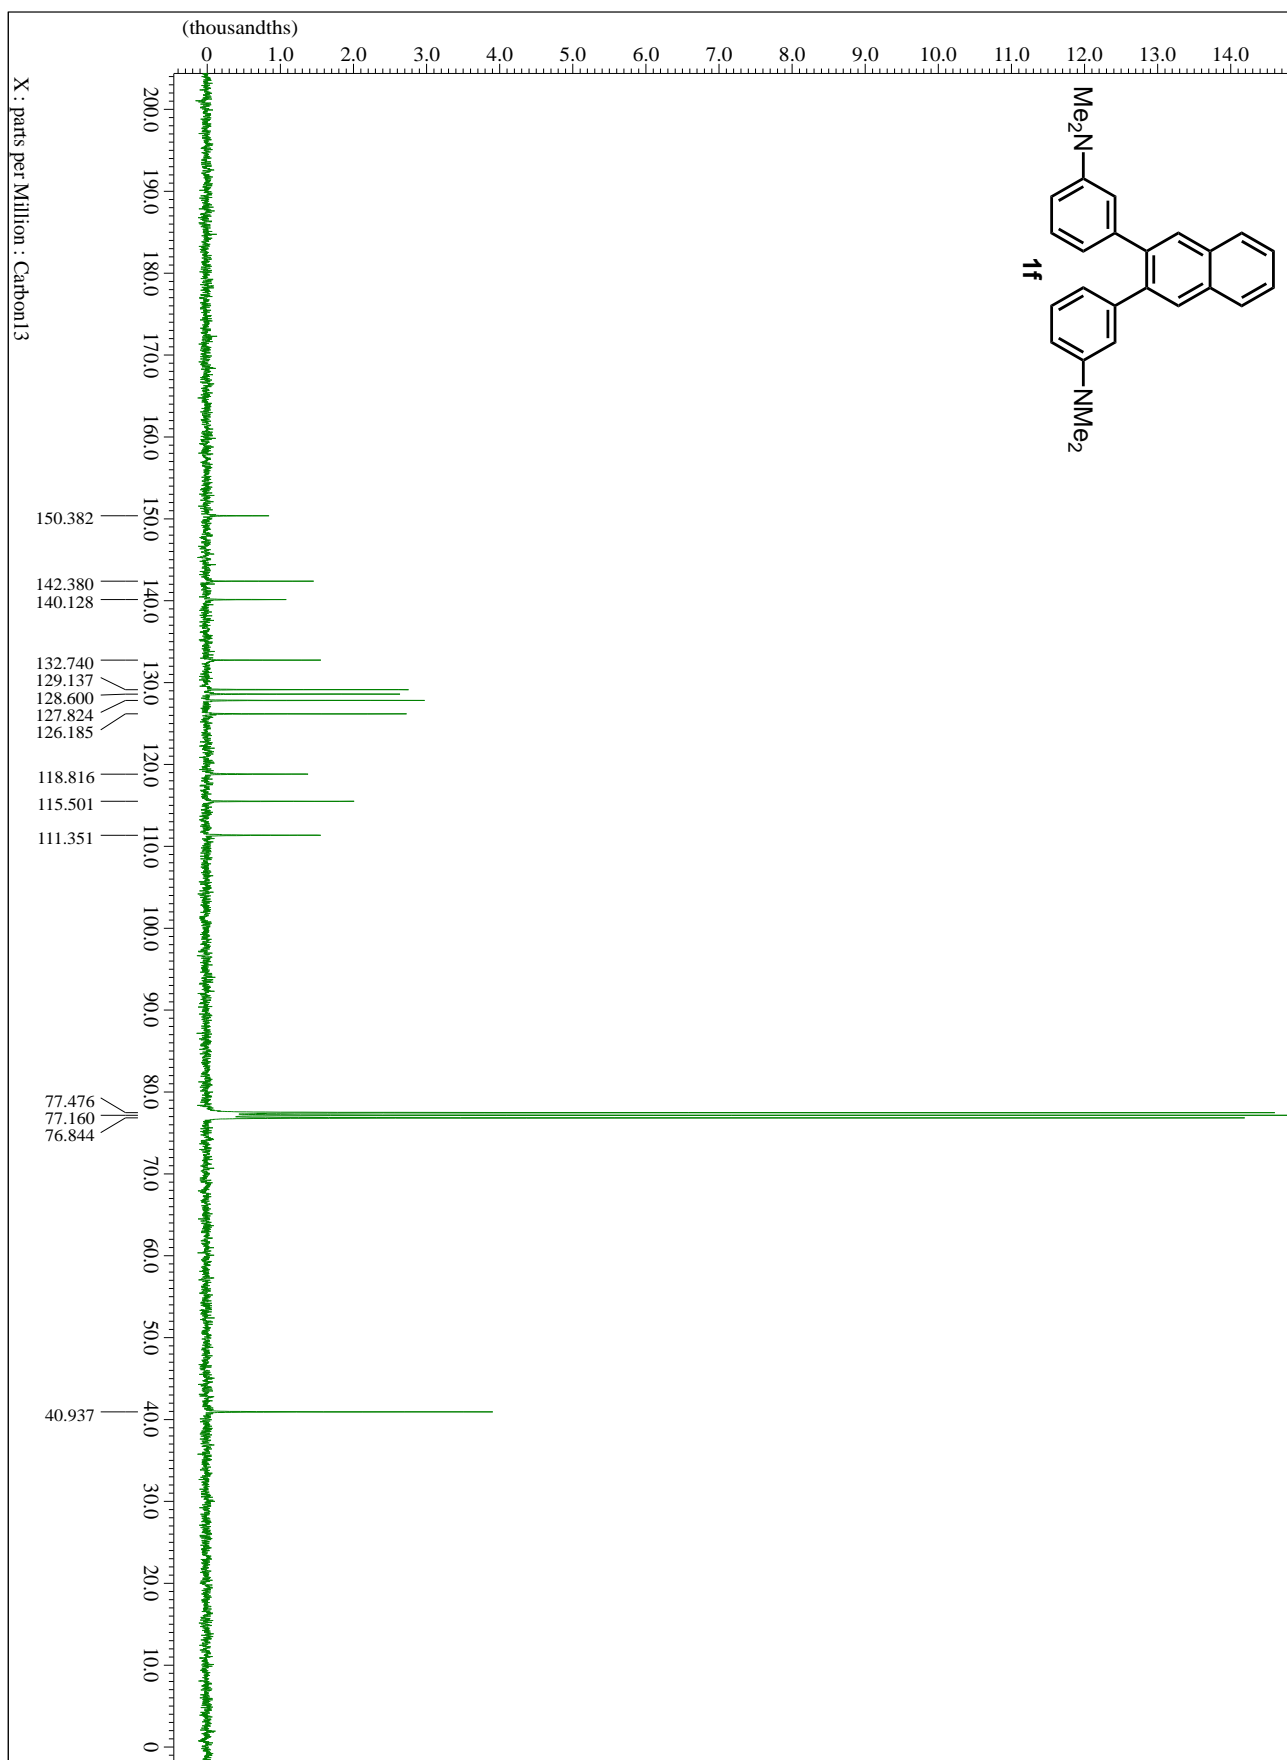

Figure S14. <sup>13</sup>C NMR of **1f** in CDCl<sub>3</sub>.

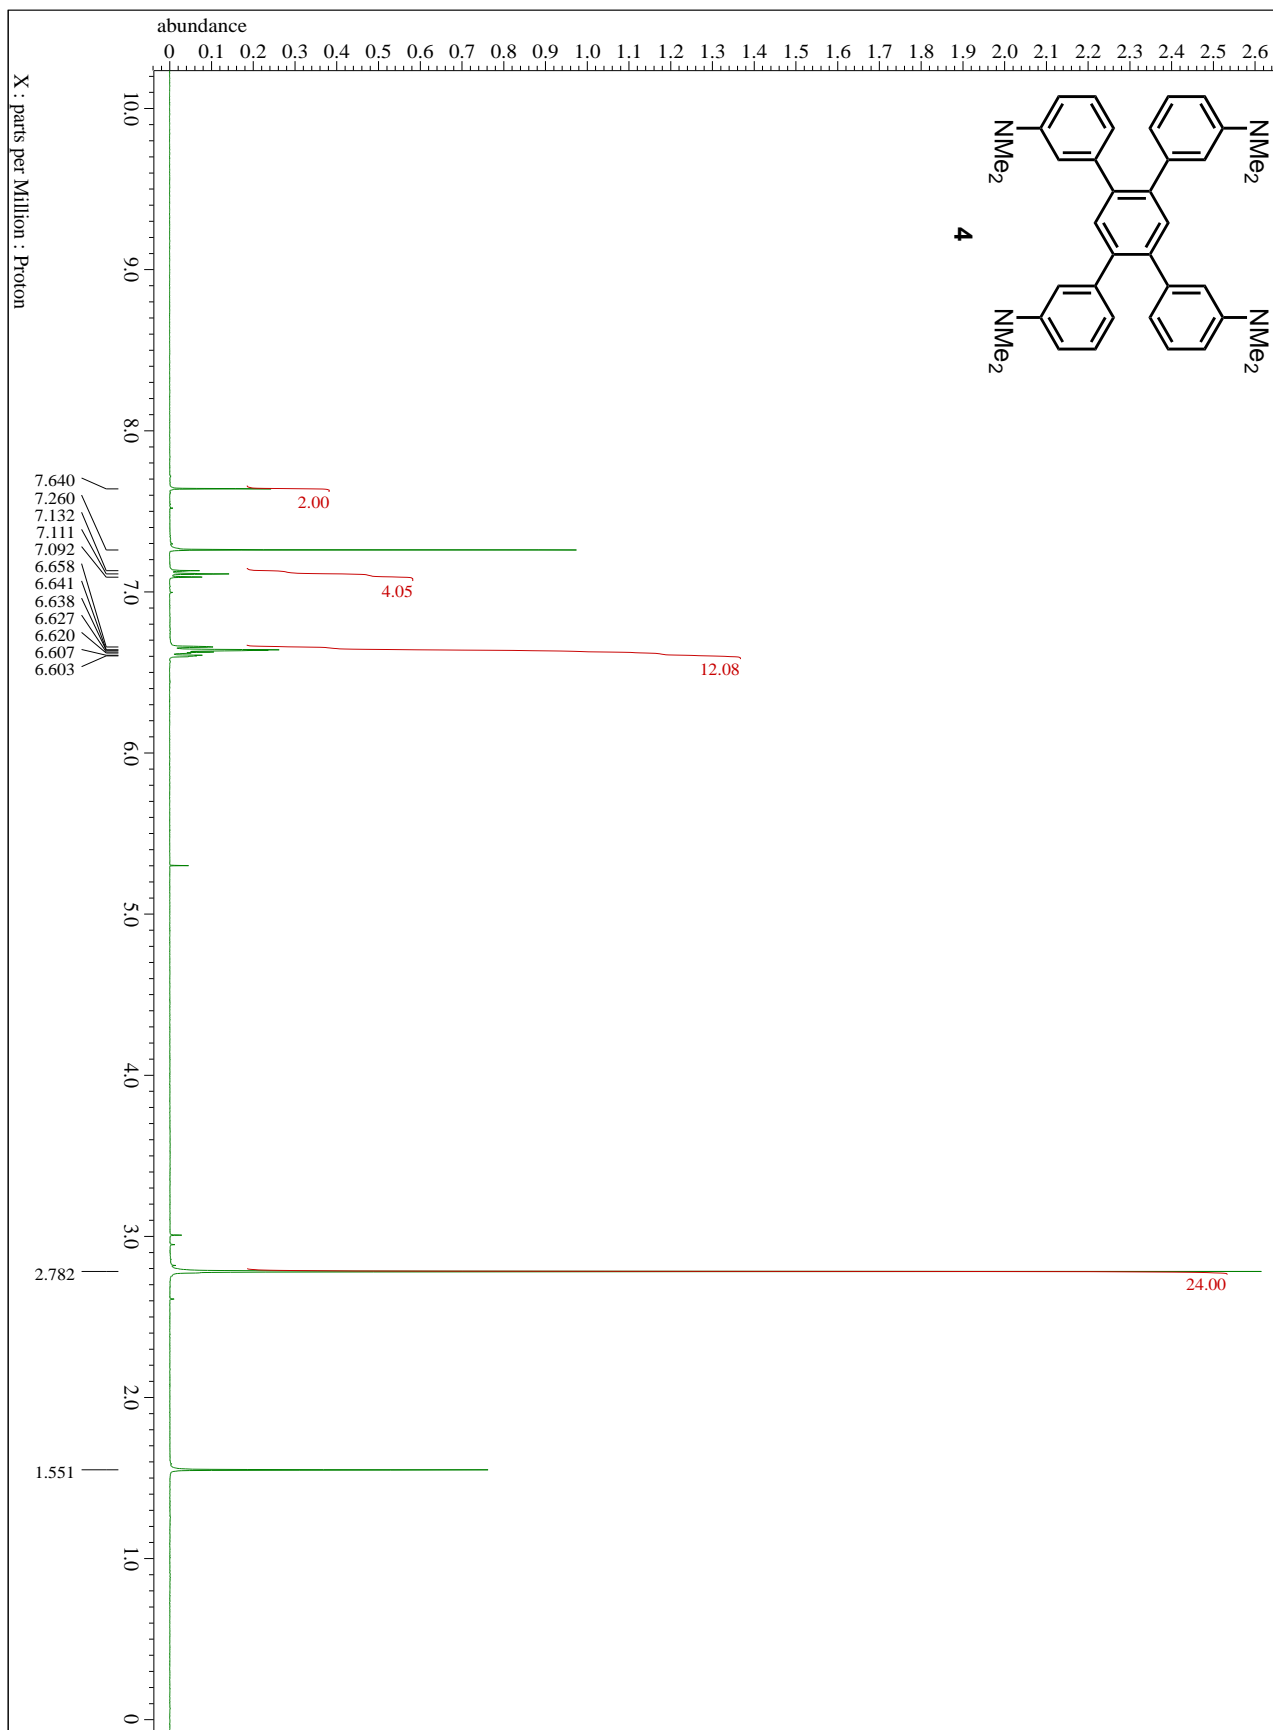

Figure S15. <sup>1</sup>H NMR of **4** in CDCl<sub>3</sub>.

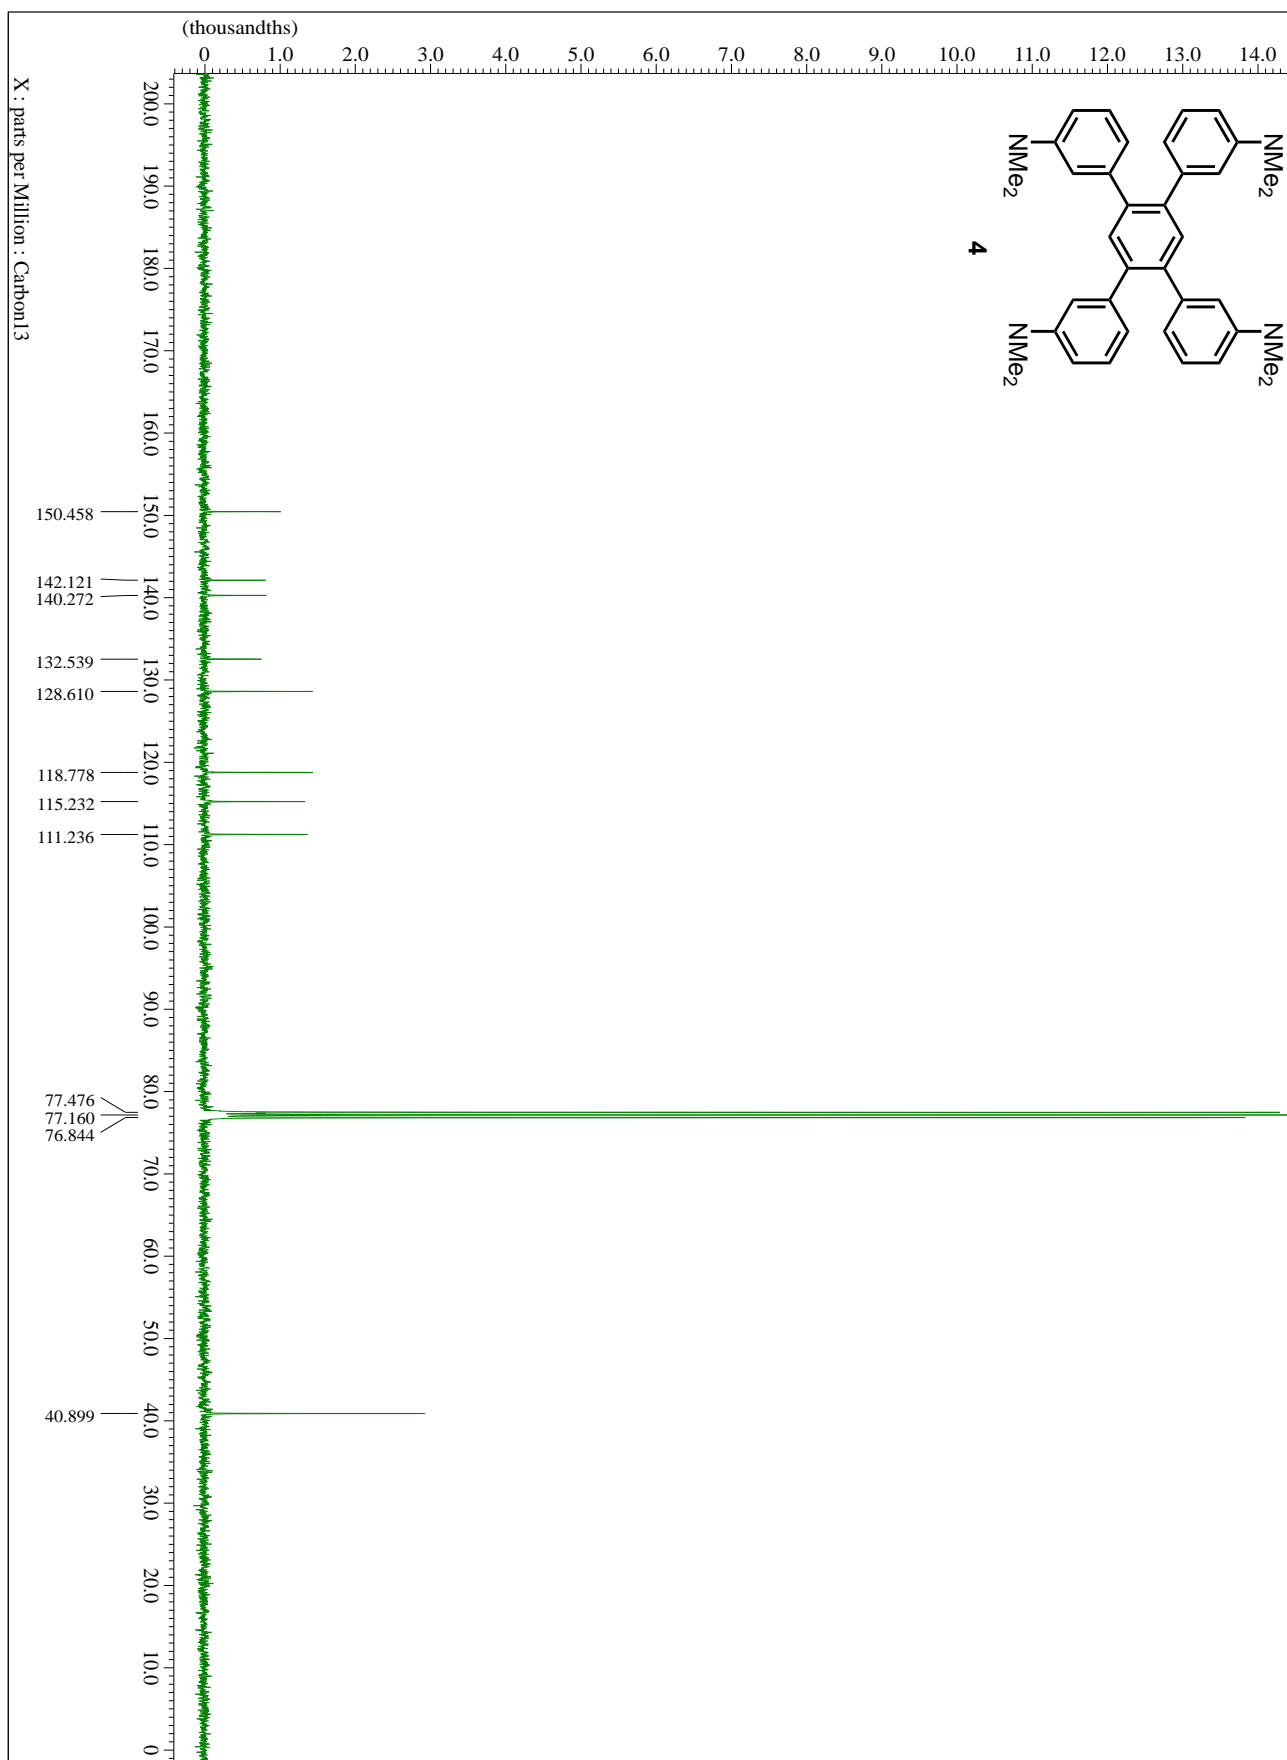

Figure S16.  $^{13}\text{C}$  NMR of **4** in  $\text{CDCl}_3$ .

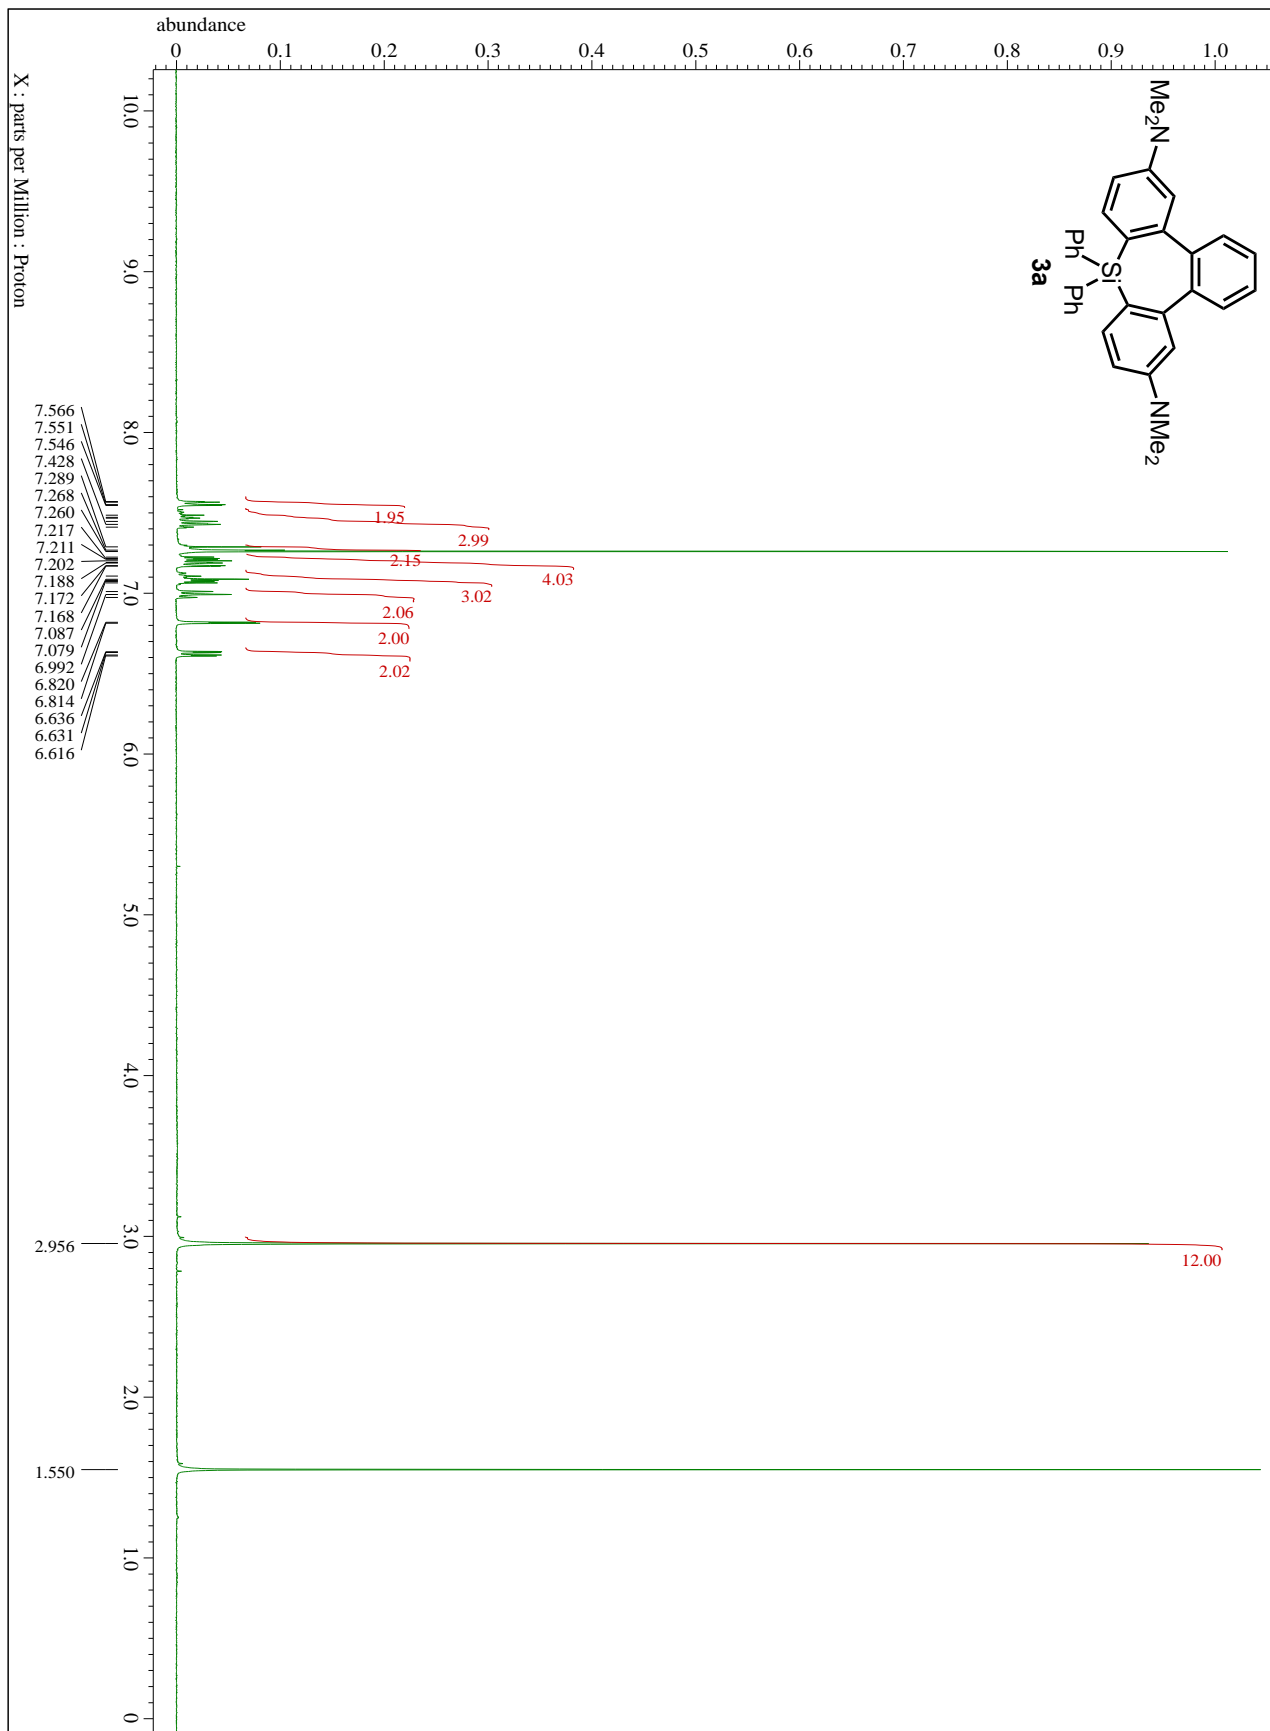

Figure S17. <sup>1</sup>H NMR of **3a** in CDCl<sub>3</sub>.

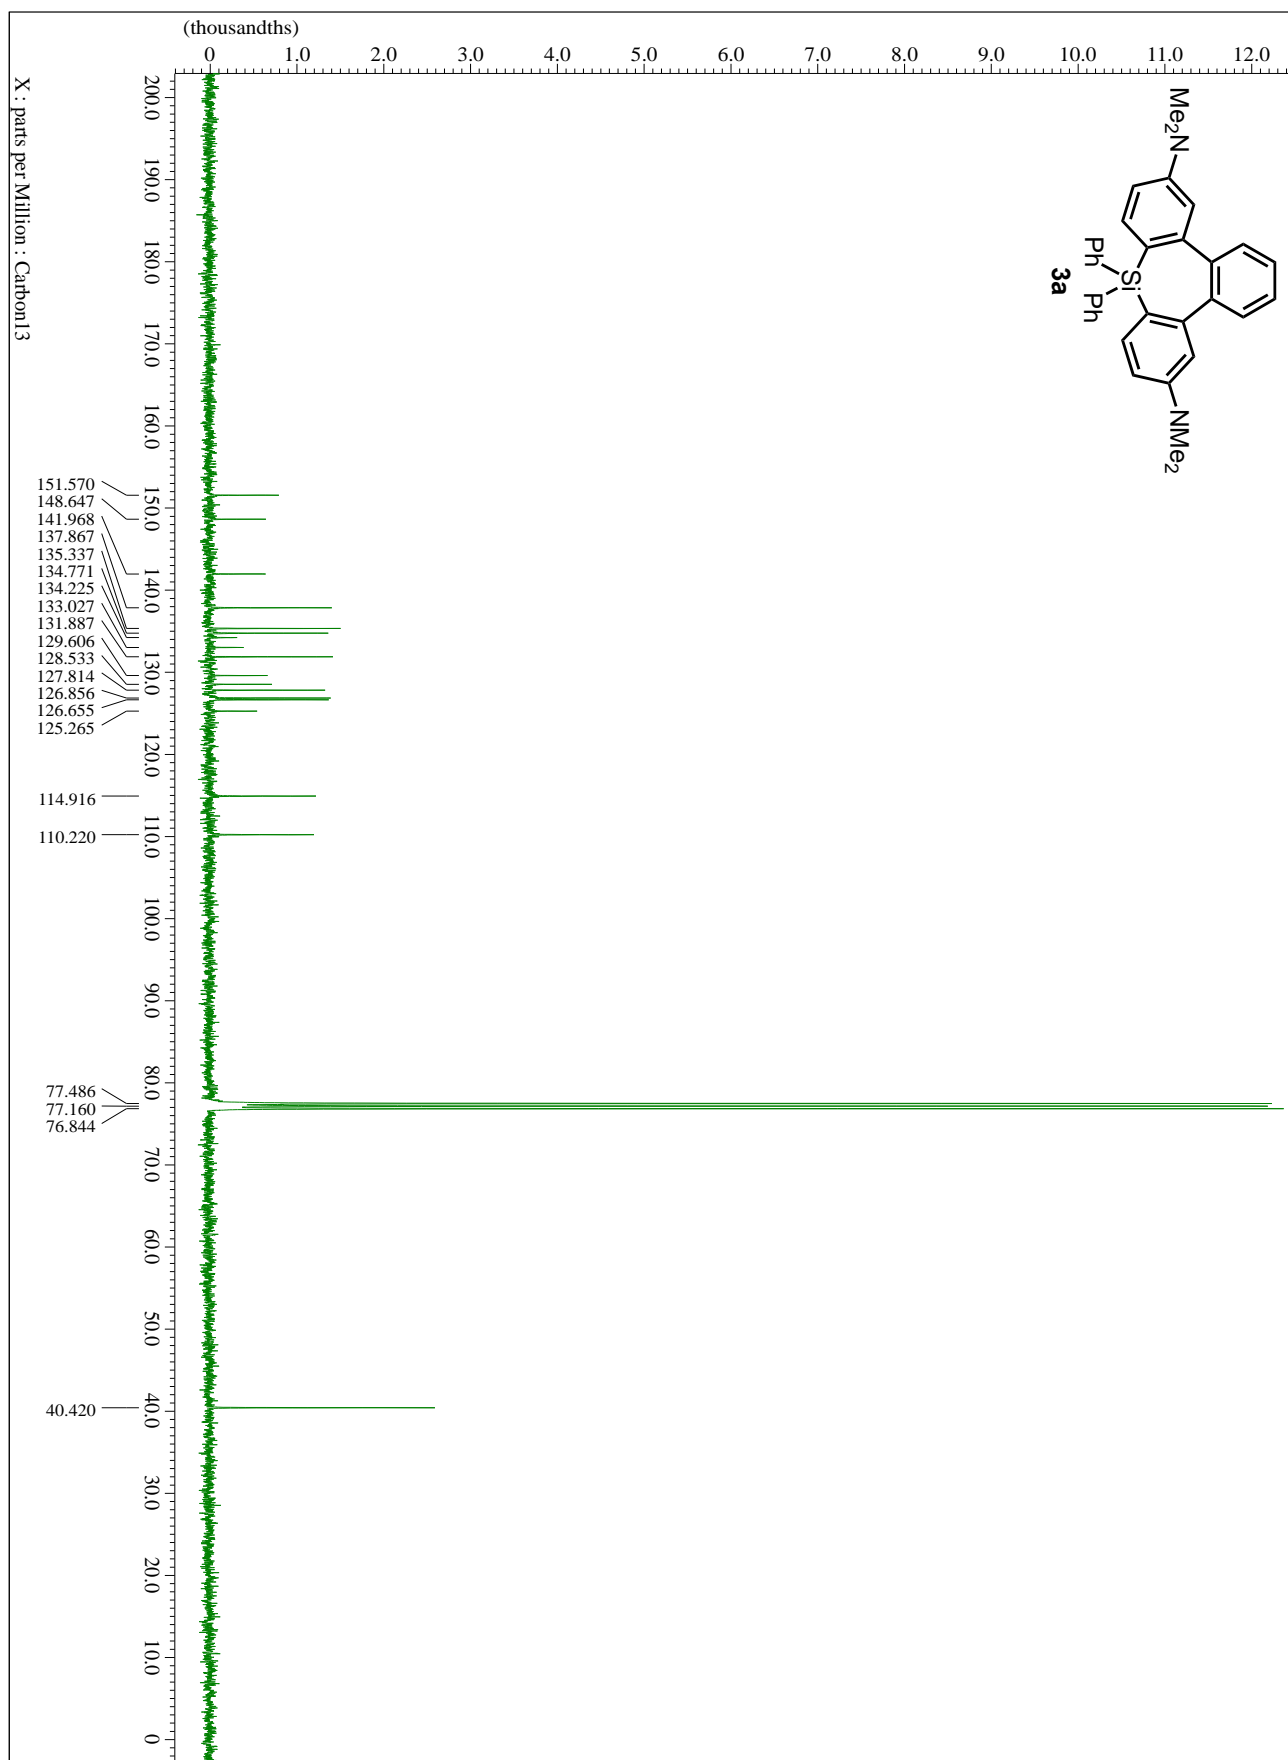

Figure S18. <sup>13</sup>C NMR of **3a** in CDCl<sub>3</sub>.

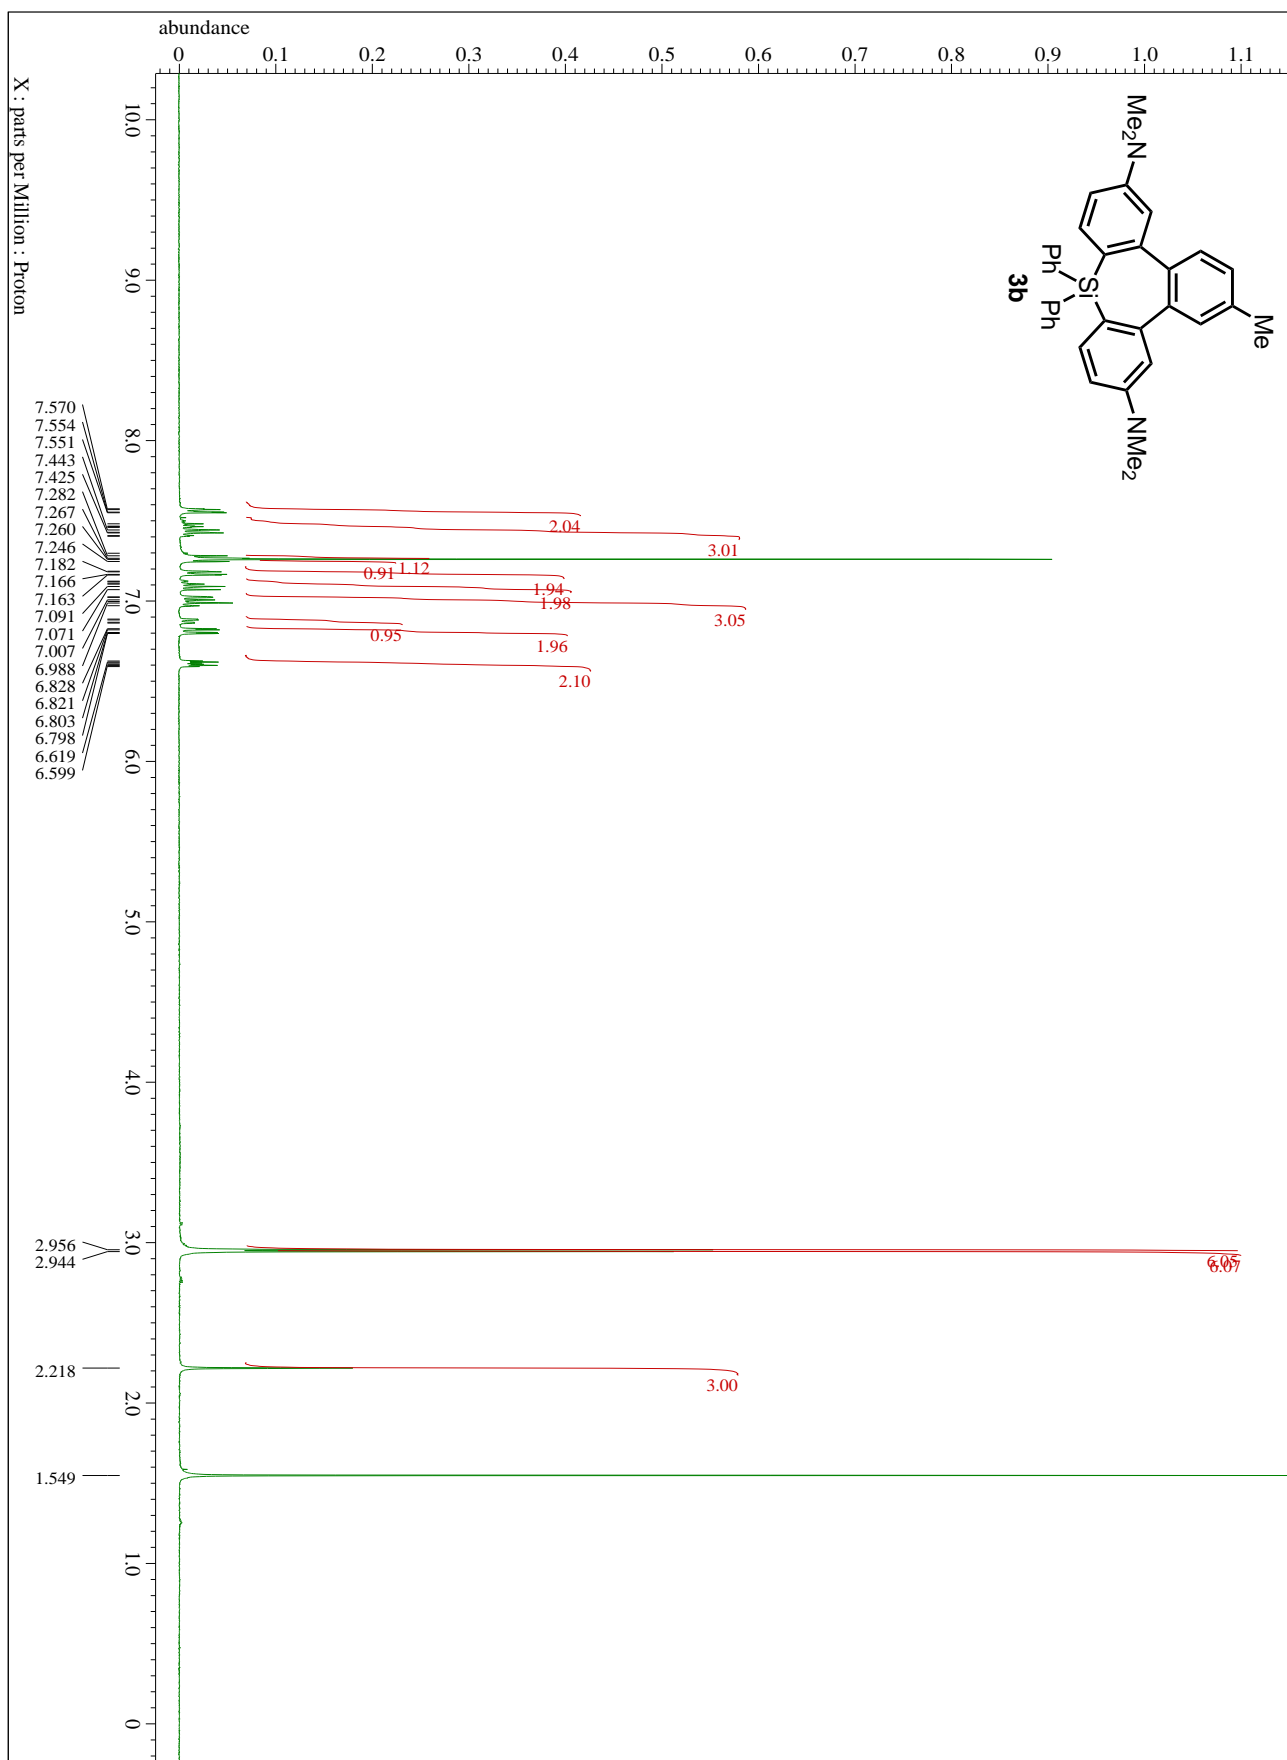

Figure S19. <sup>1</sup>H NMR of **3b** in CDCl<sub>3</sub>.

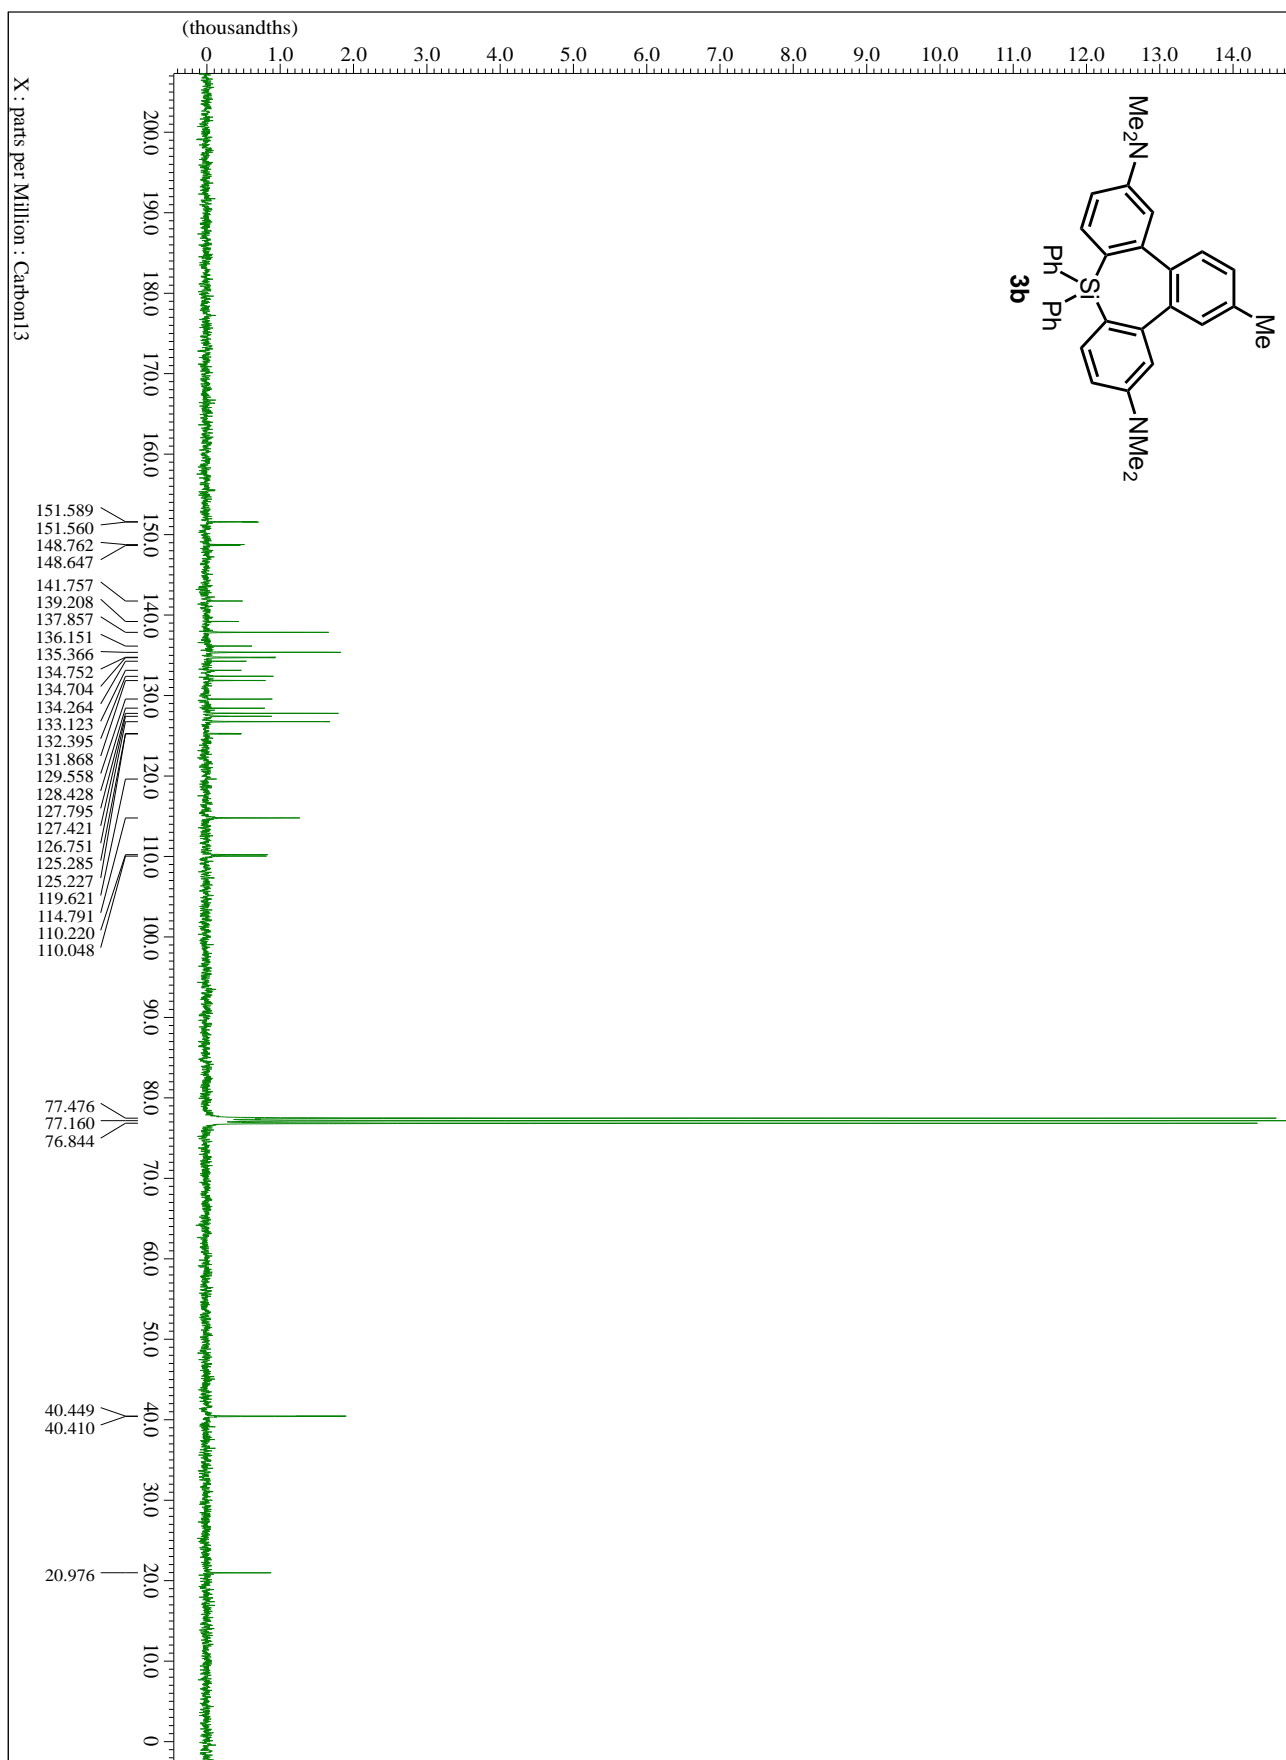

Figure S20. <sup>13</sup>C NMR of **3b** in CDCl<sub>3</sub>.



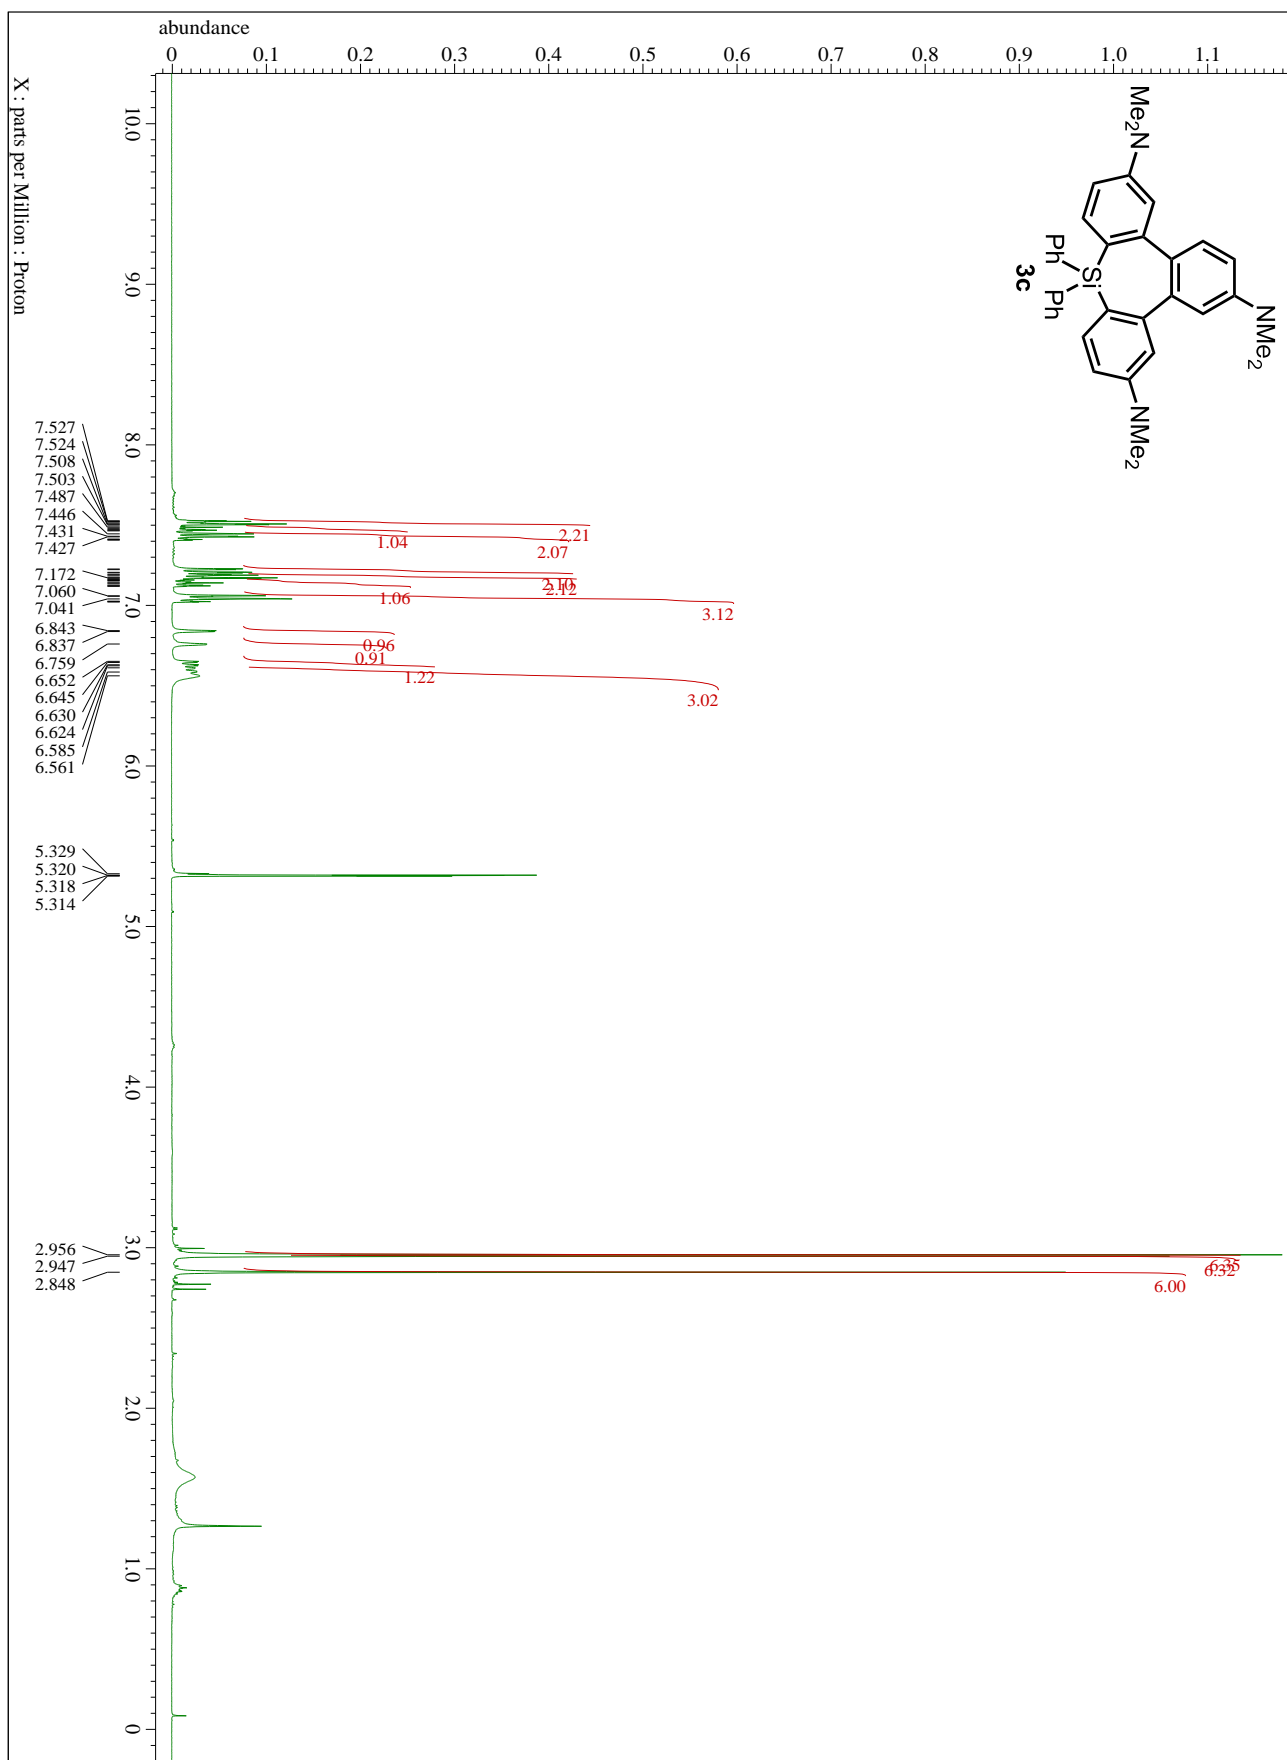

**Figure S21.** <sup>1</sup>H NMR of **3c** in CD<sub>2</sub>Cl<sub>2</sub>.

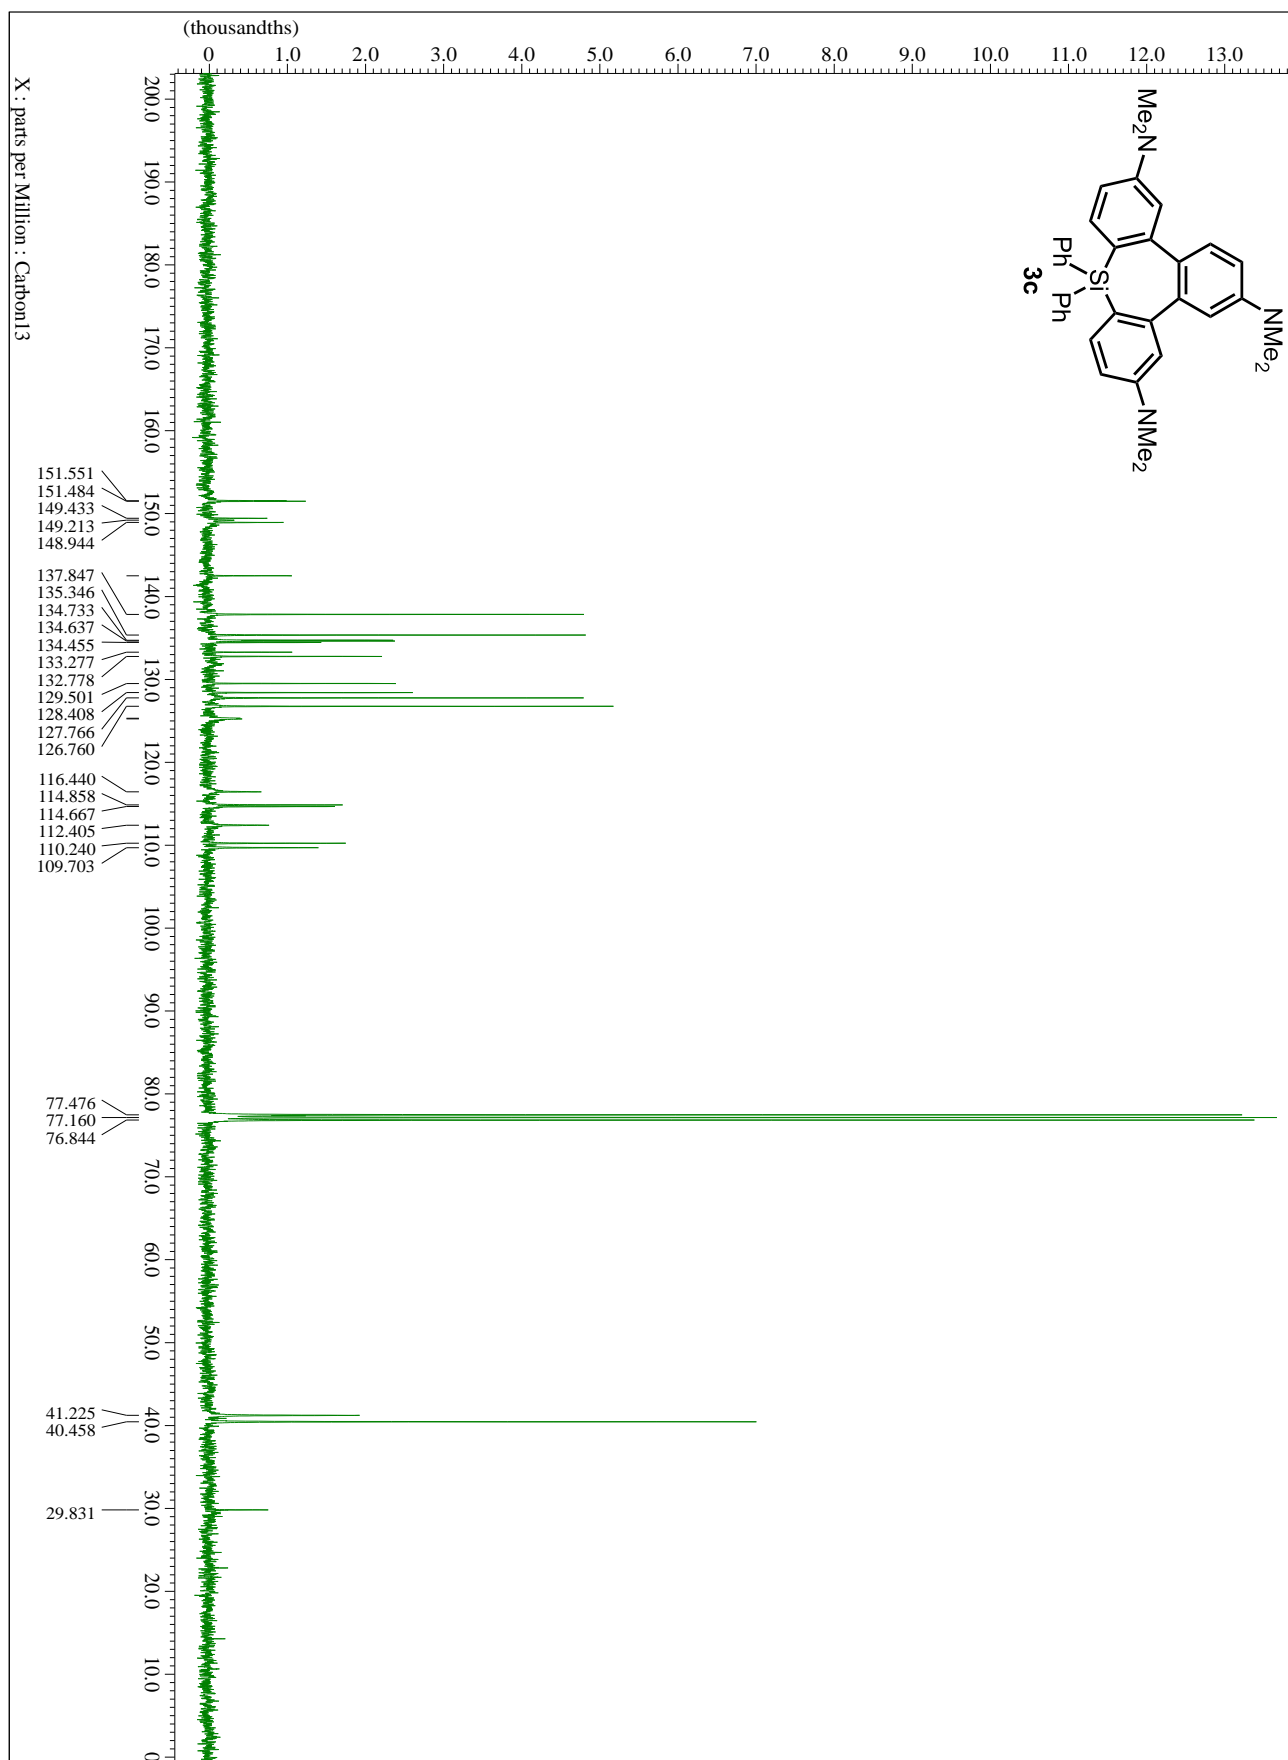

Figure S22. <sup>13</sup>C NMR of **3c** in CDCl<sub>3</sub>.

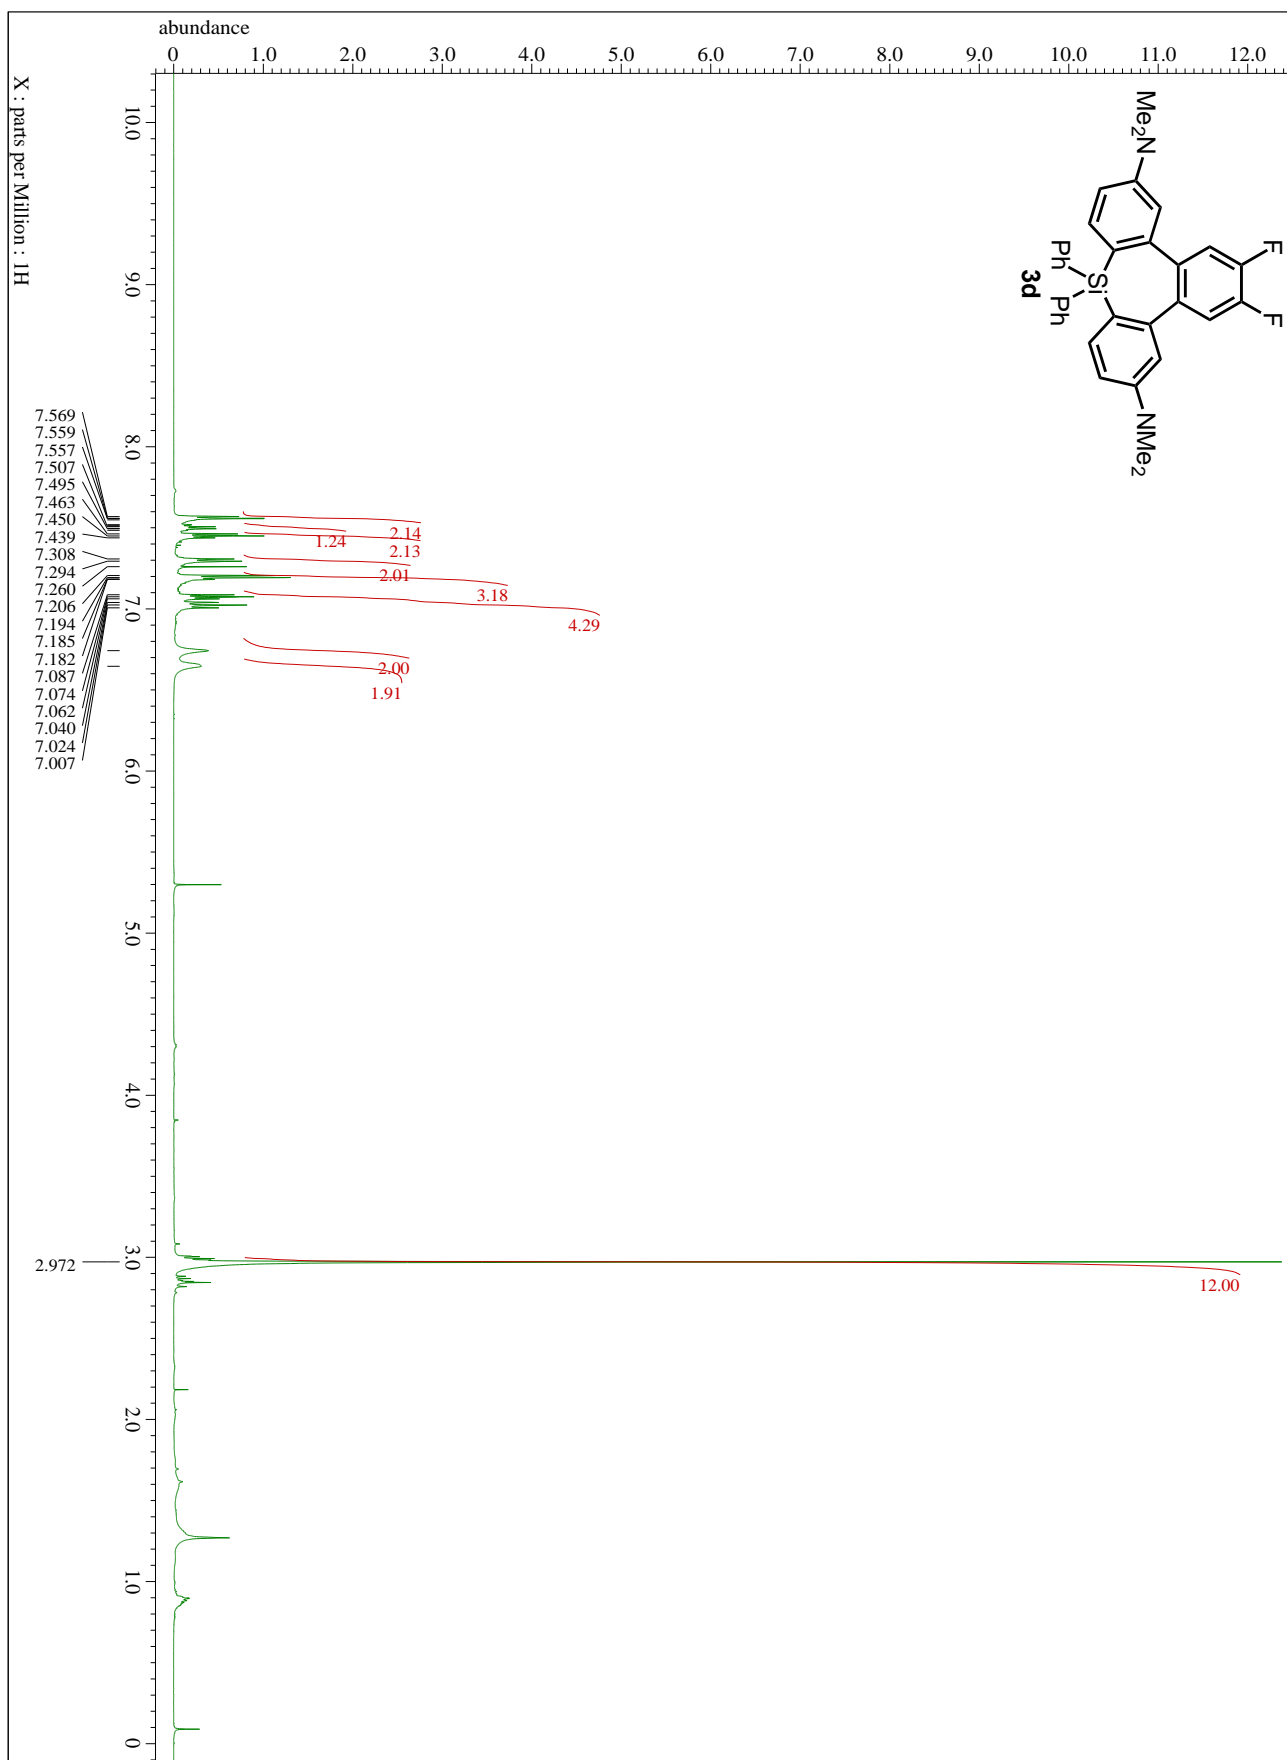

**Figure S23.**  $^1\text{H}$  NMR of **3d** in  $\text{CDCl}_3$ .

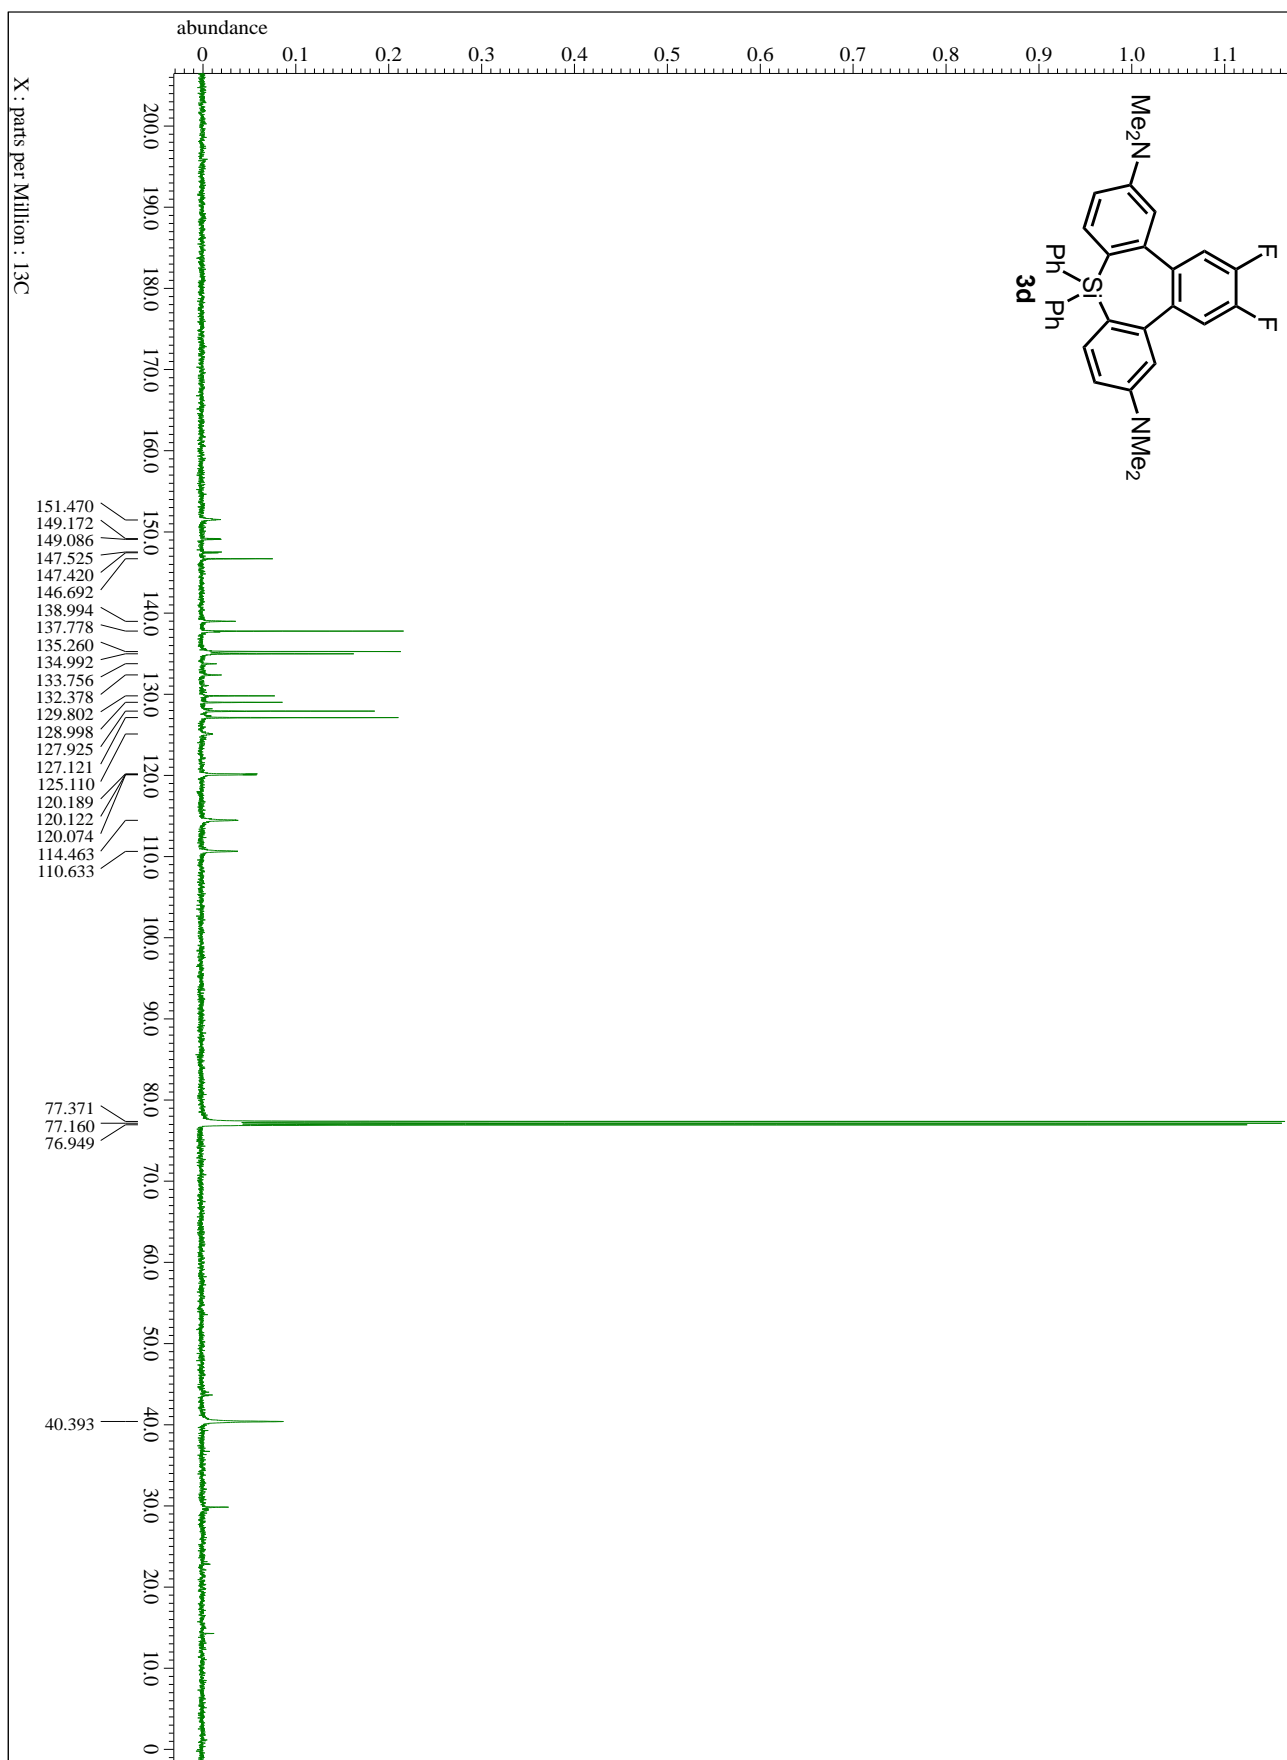

**Figure S24.**  $^{13}\text{C}$  NMR of **3d** in  $\text{CDCl}_3$ .

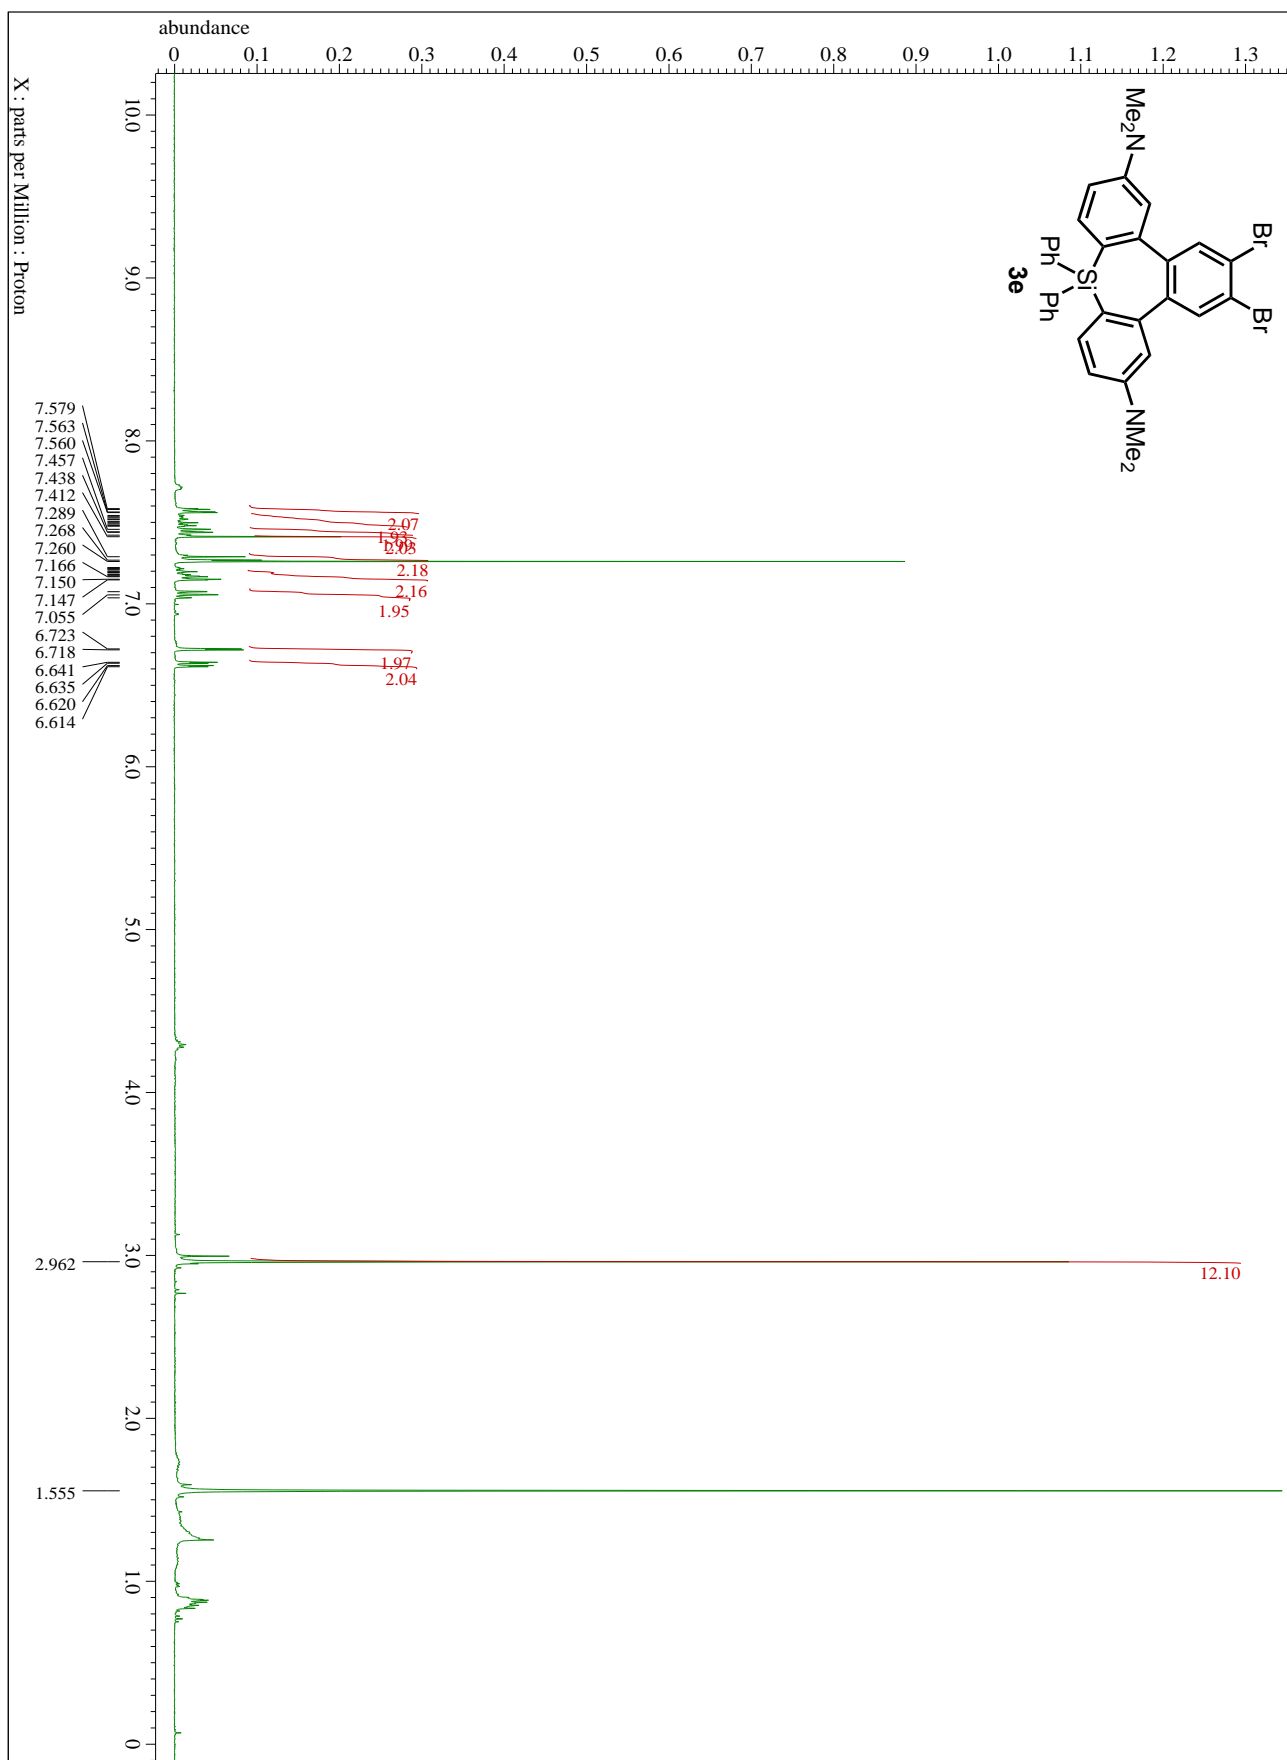

Figure S25. <sup>1</sup>H NMR of **3e** in CDCl<sub>3</sub>.

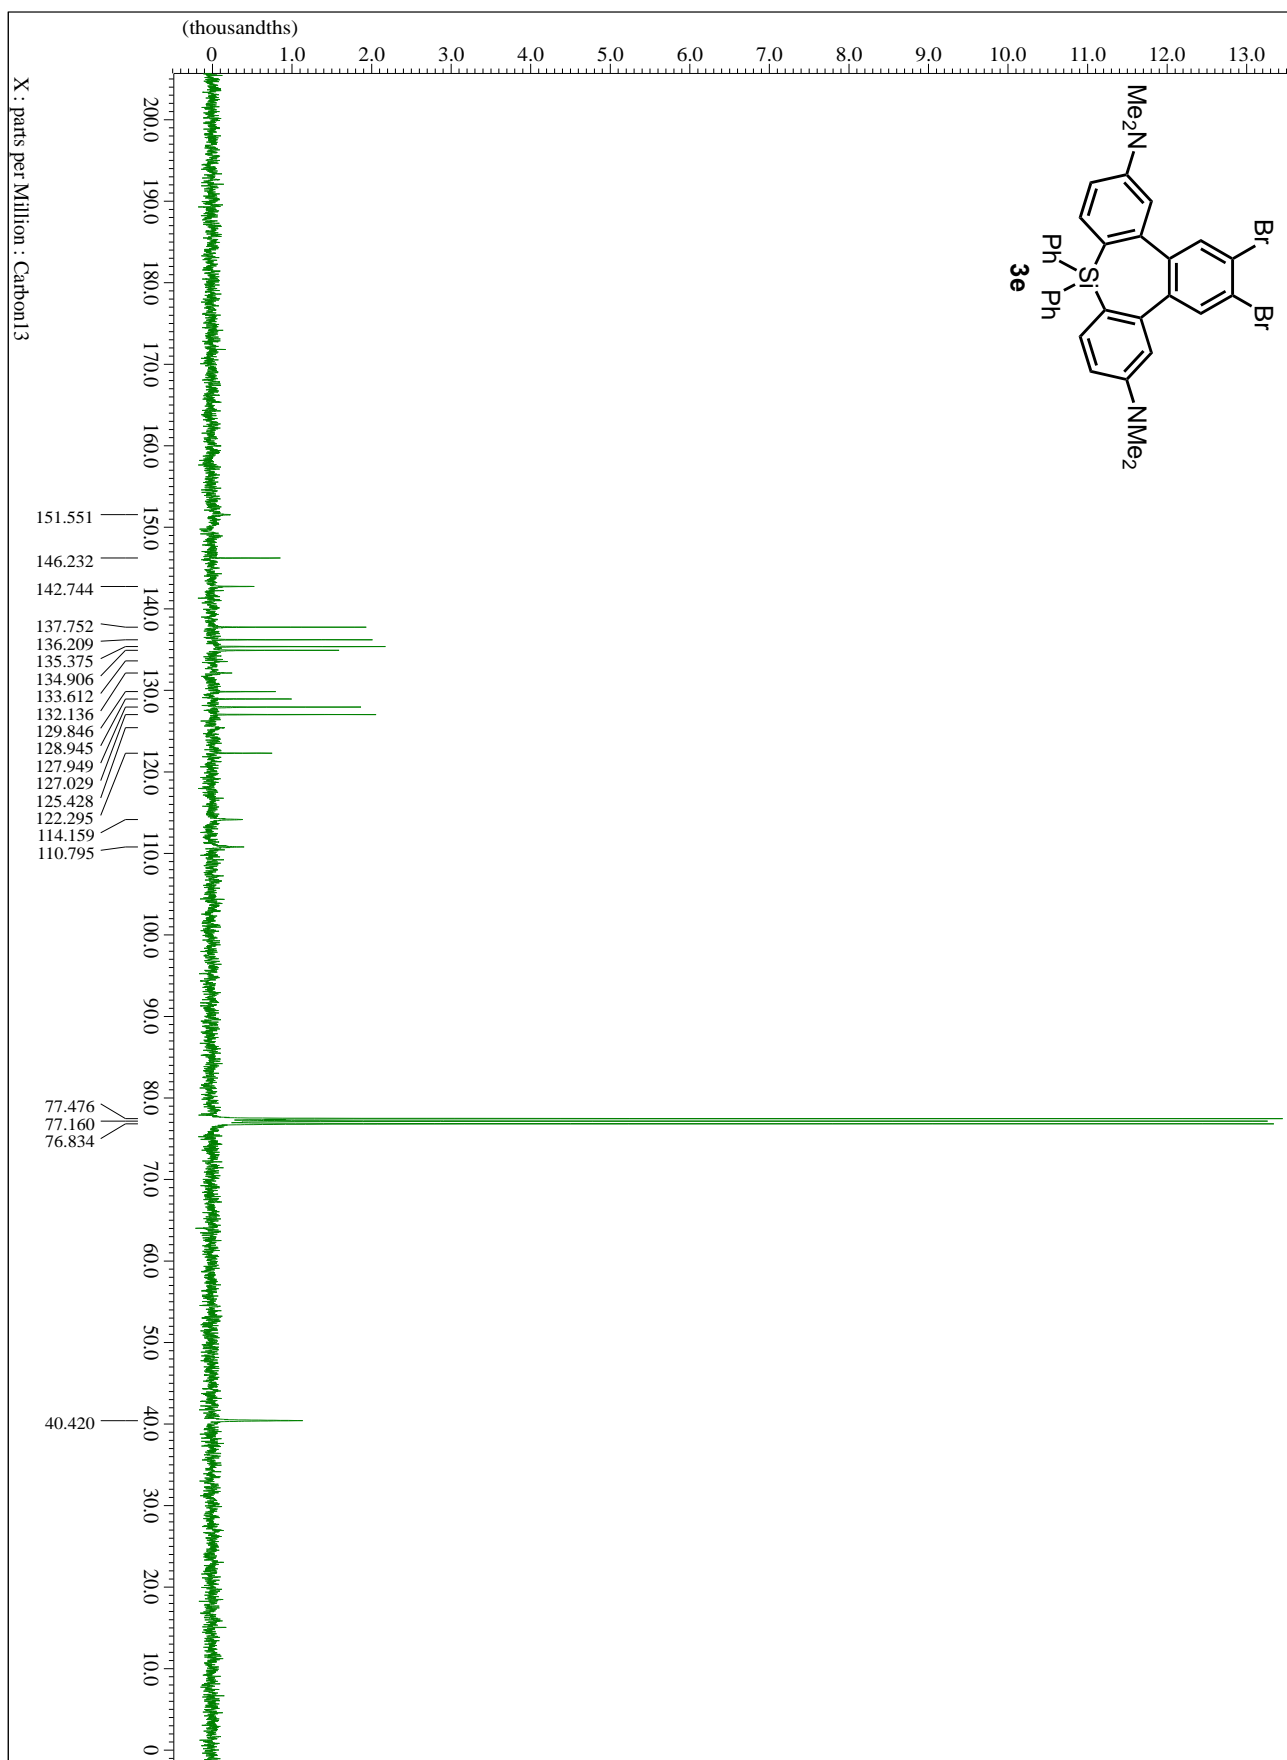

Figure S26. <sup>13</sup>C NMR of **3e** in CDCl<sub>3</sub>.

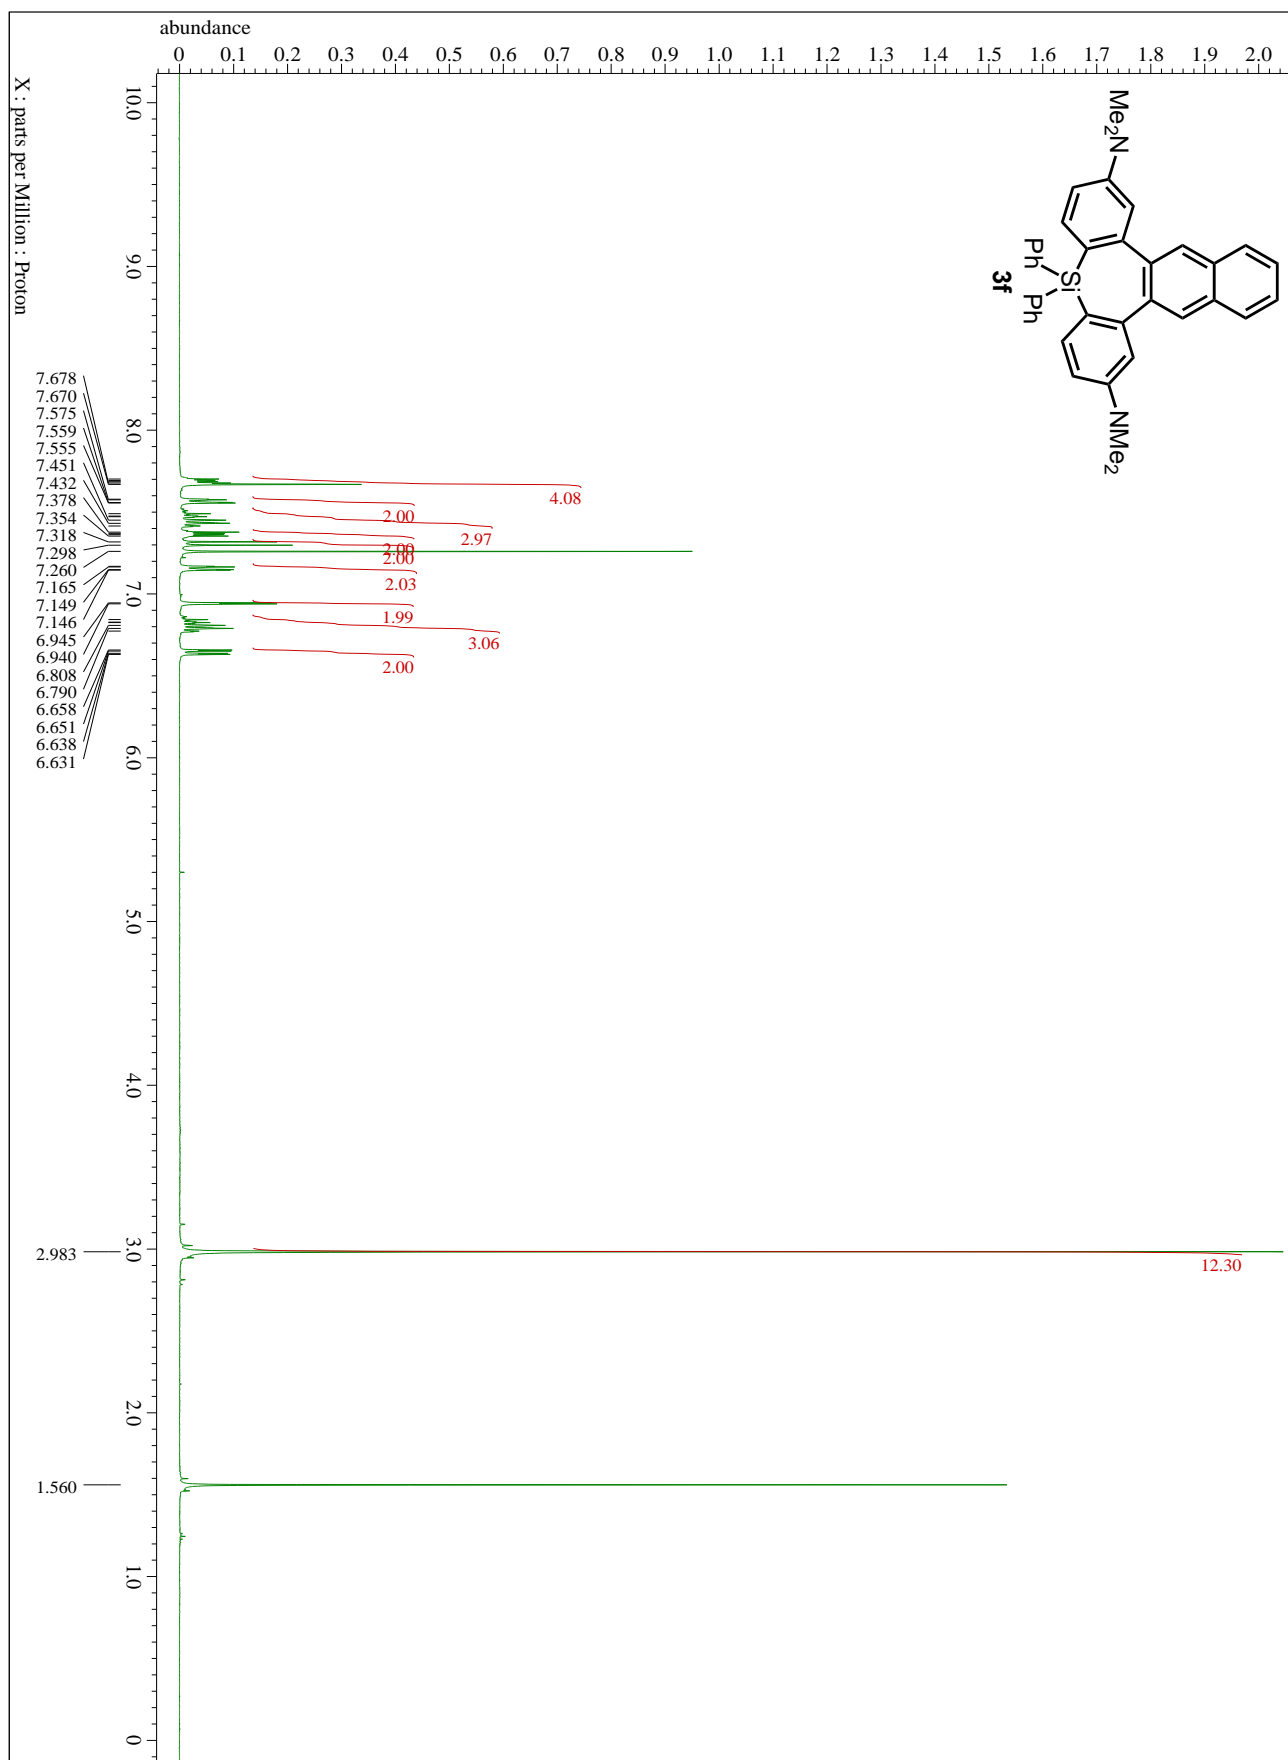

Figure S27. <sup>1</sup>H NMR of **3f** in CDCl<sub>3</sub>.

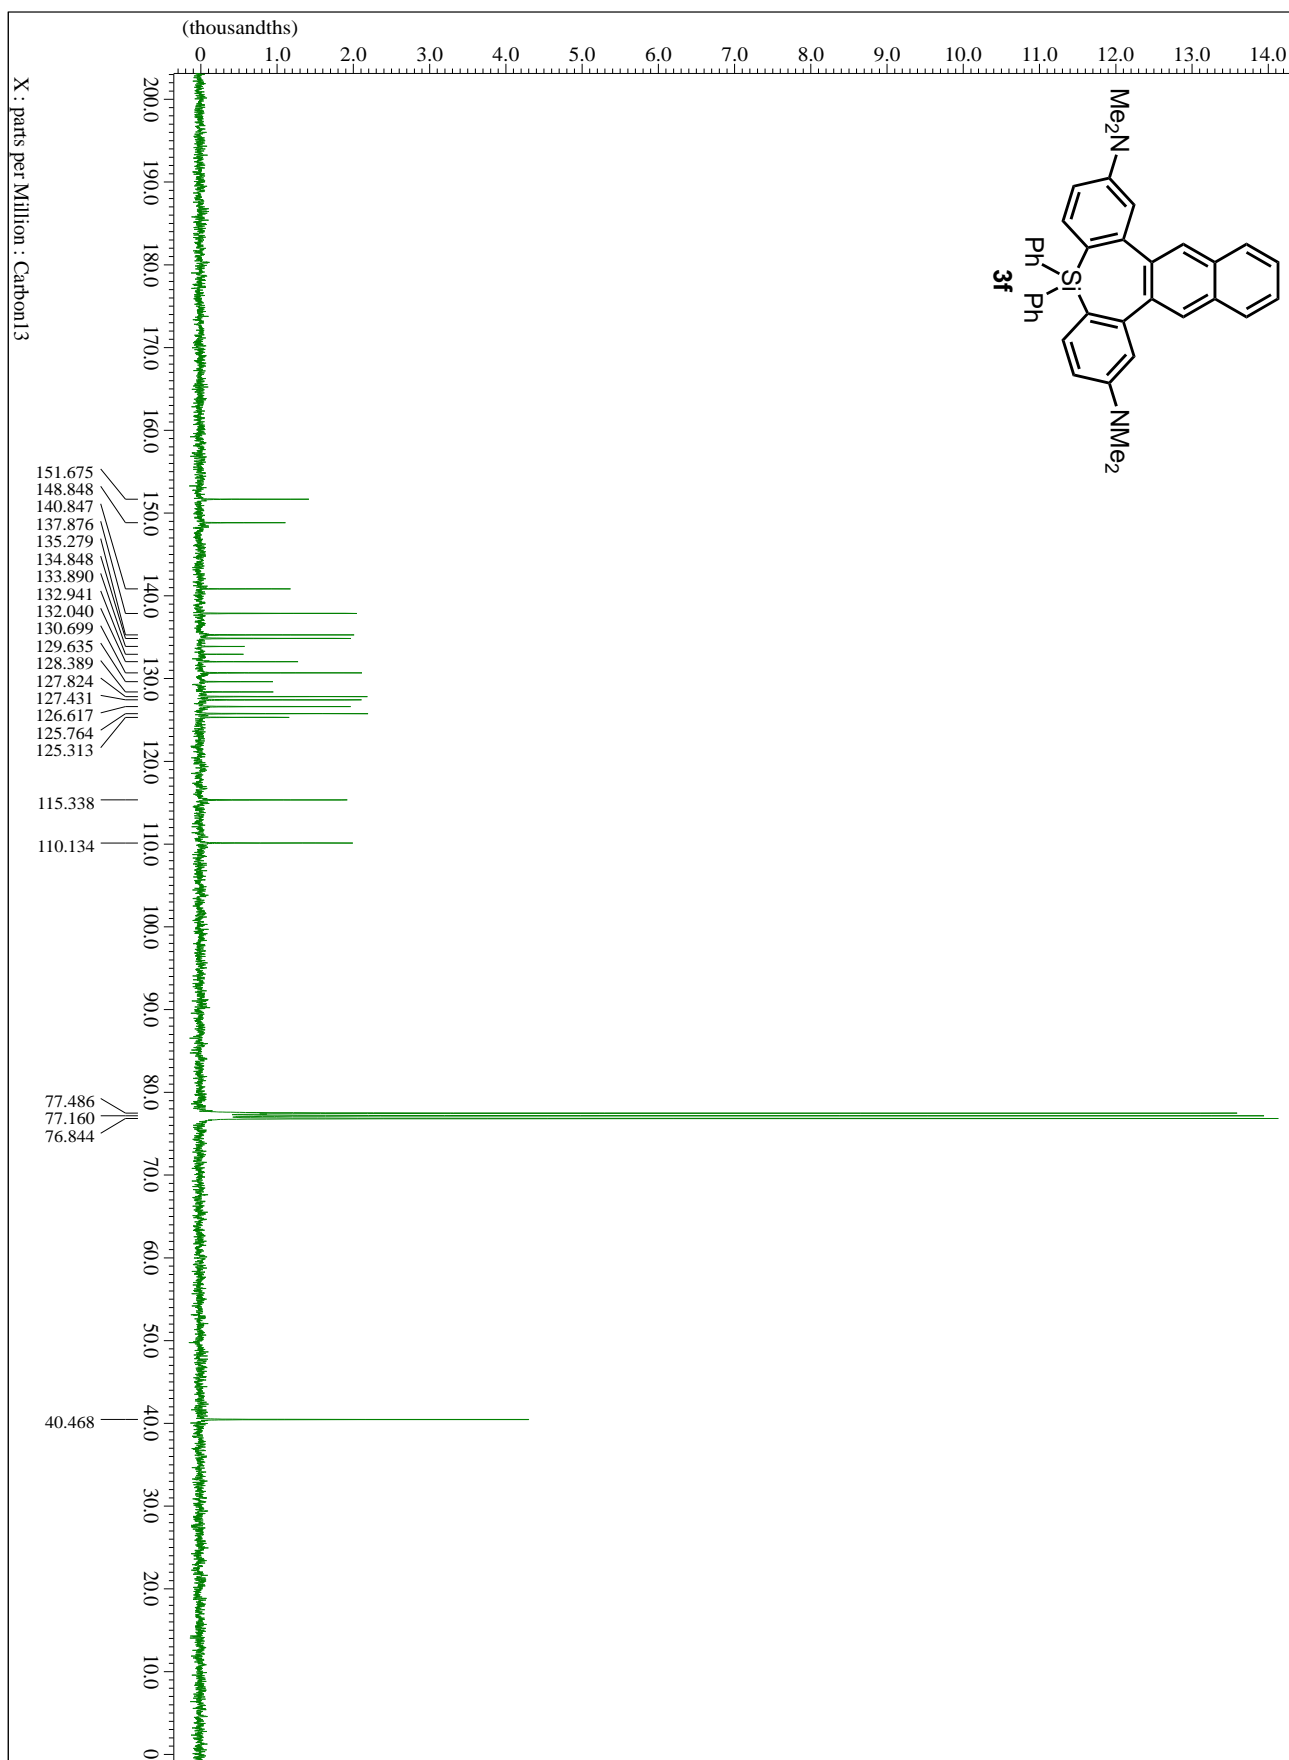

Figure S28. <sup>13</sup>C NMR of **3f** in CDCl<sub>3</sub>.



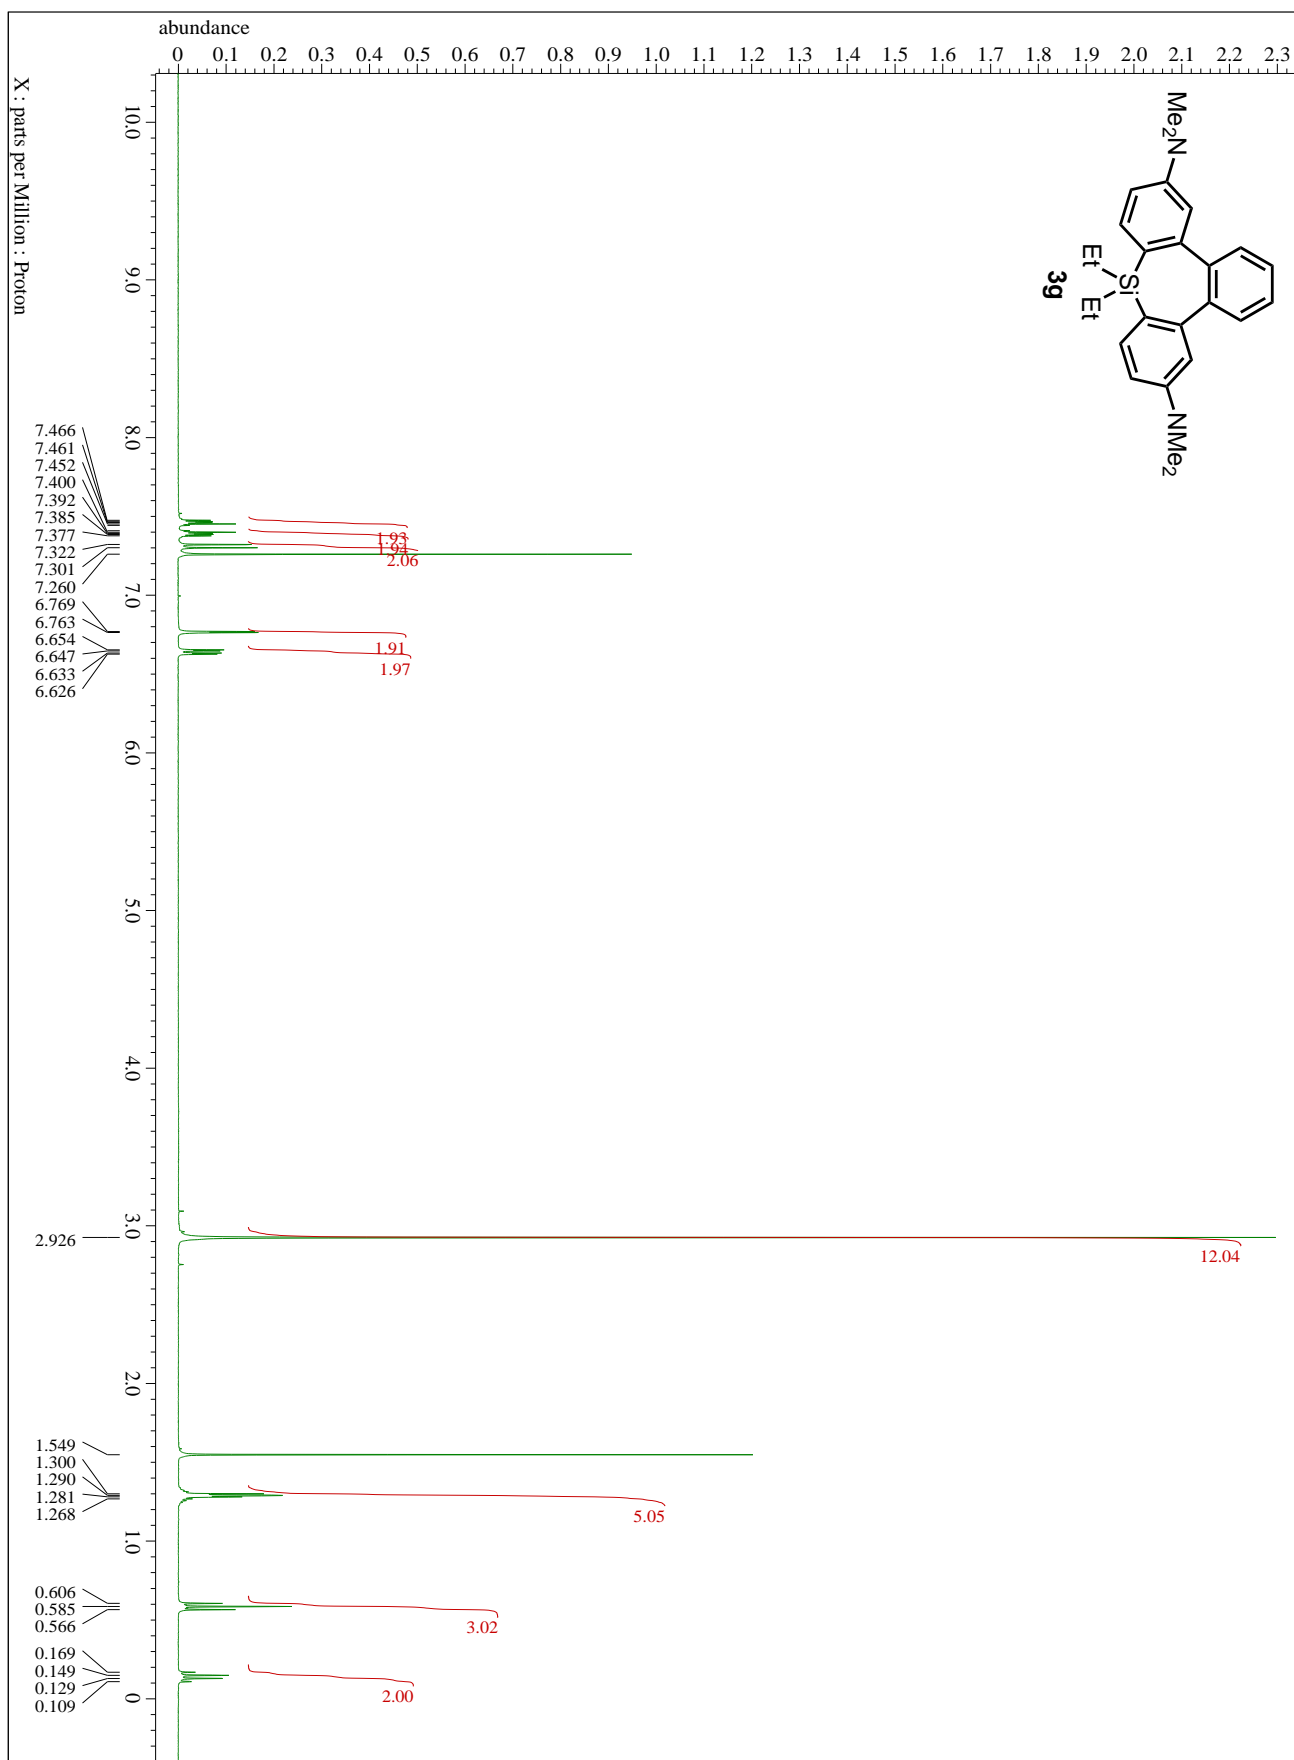

Figure S29.  $^1\text{H}$  NMR of **3g** in  $\text{CDCl}_3$ .

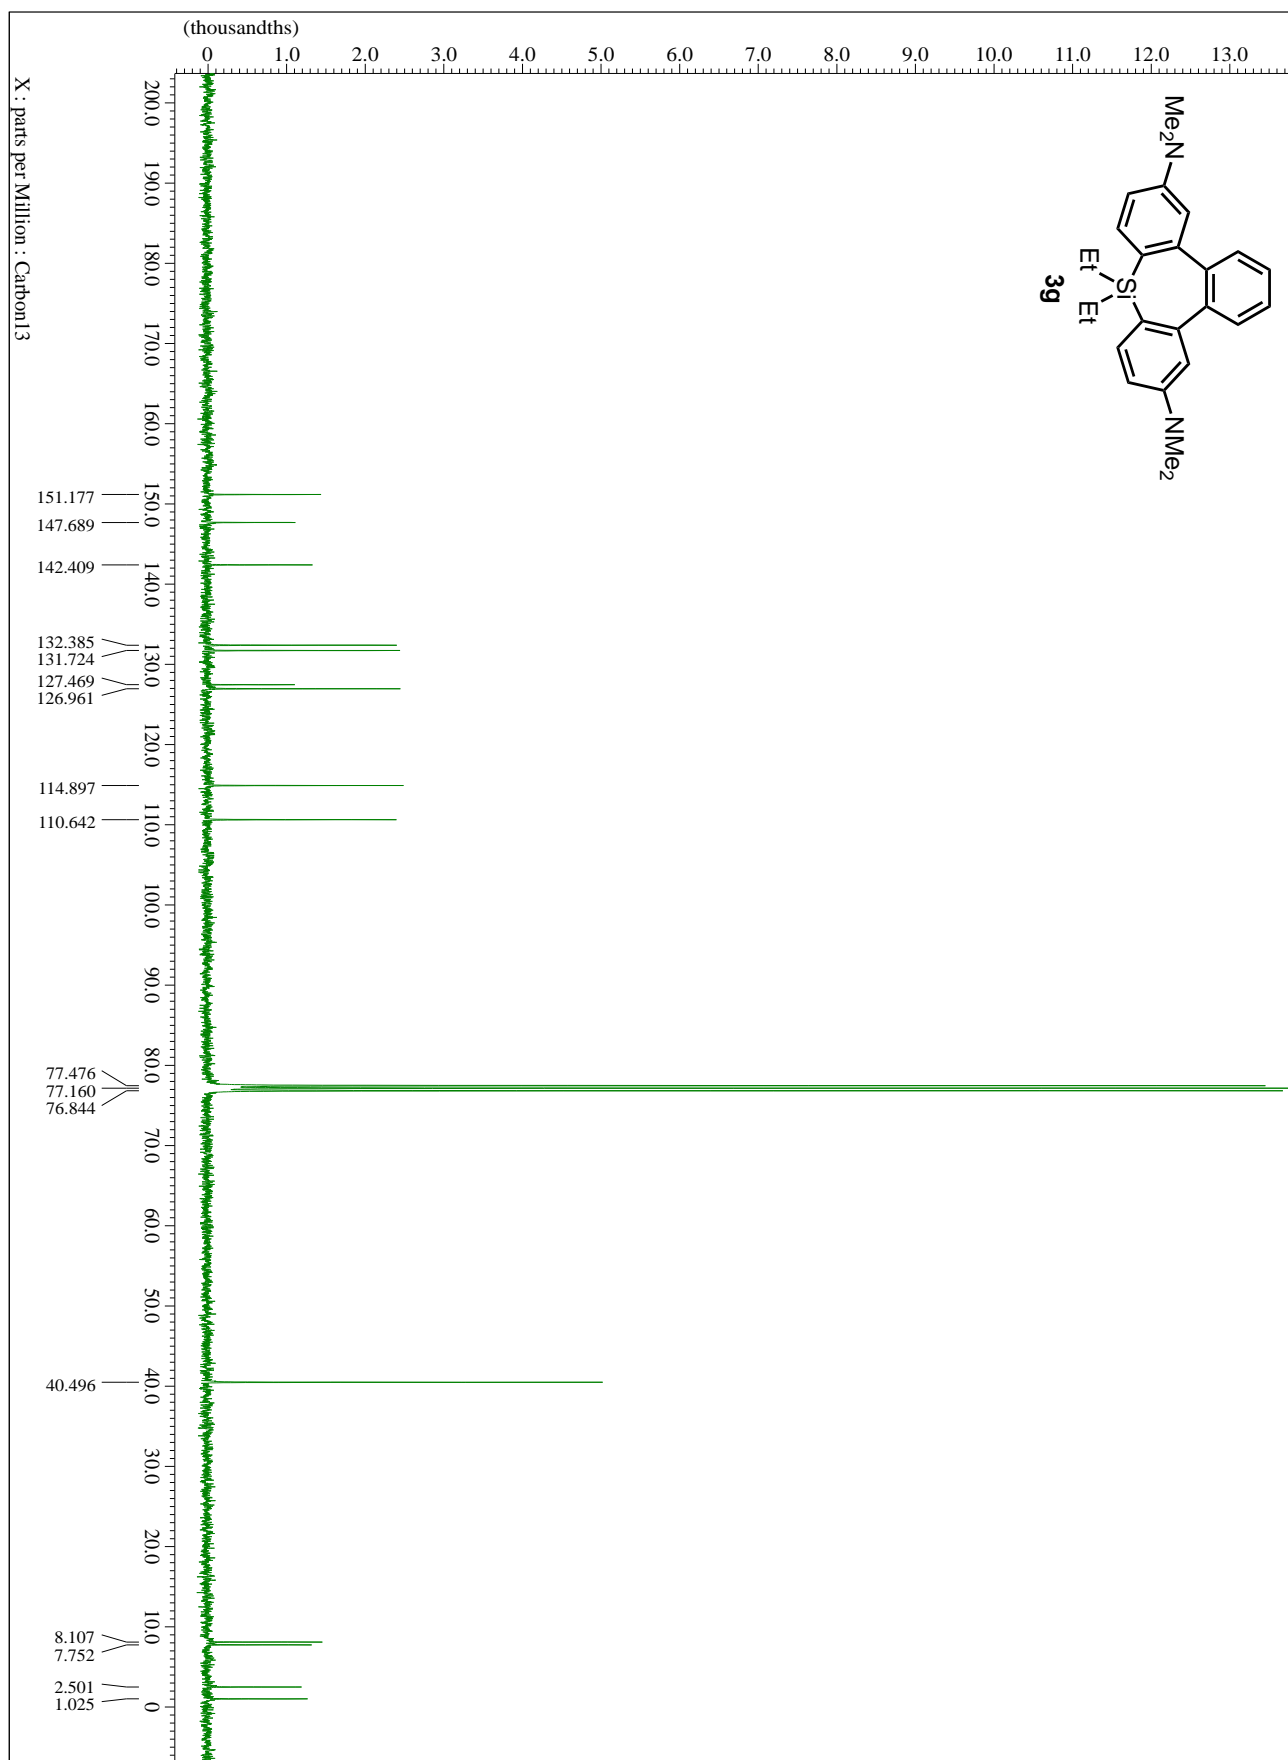

Figure S30. <sup>13</sup>C NMR of **3g** in CDCl<sub>3</sub>.

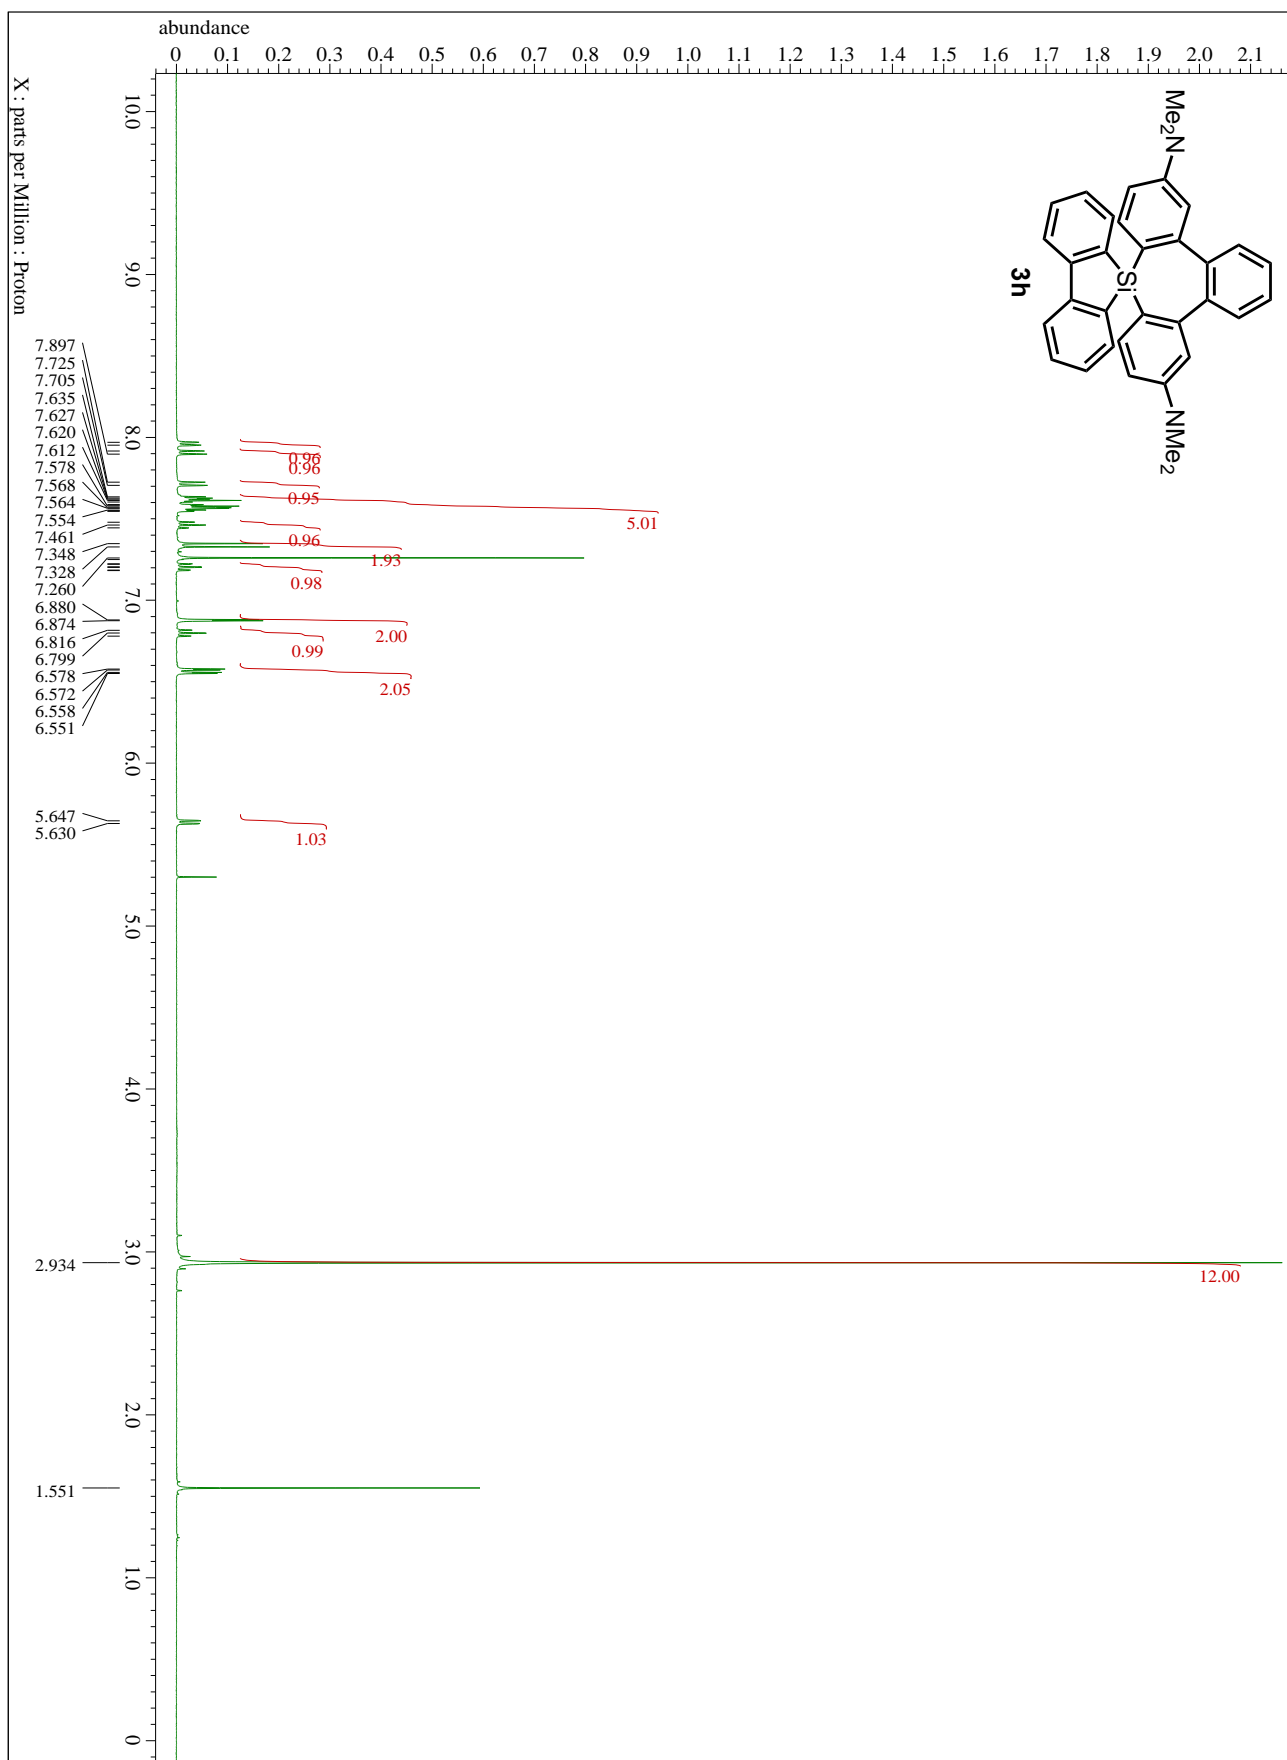

Figure S31.  $^1\text{H}$  NMR of **3h** in  $\text{CDCl}_3$ .

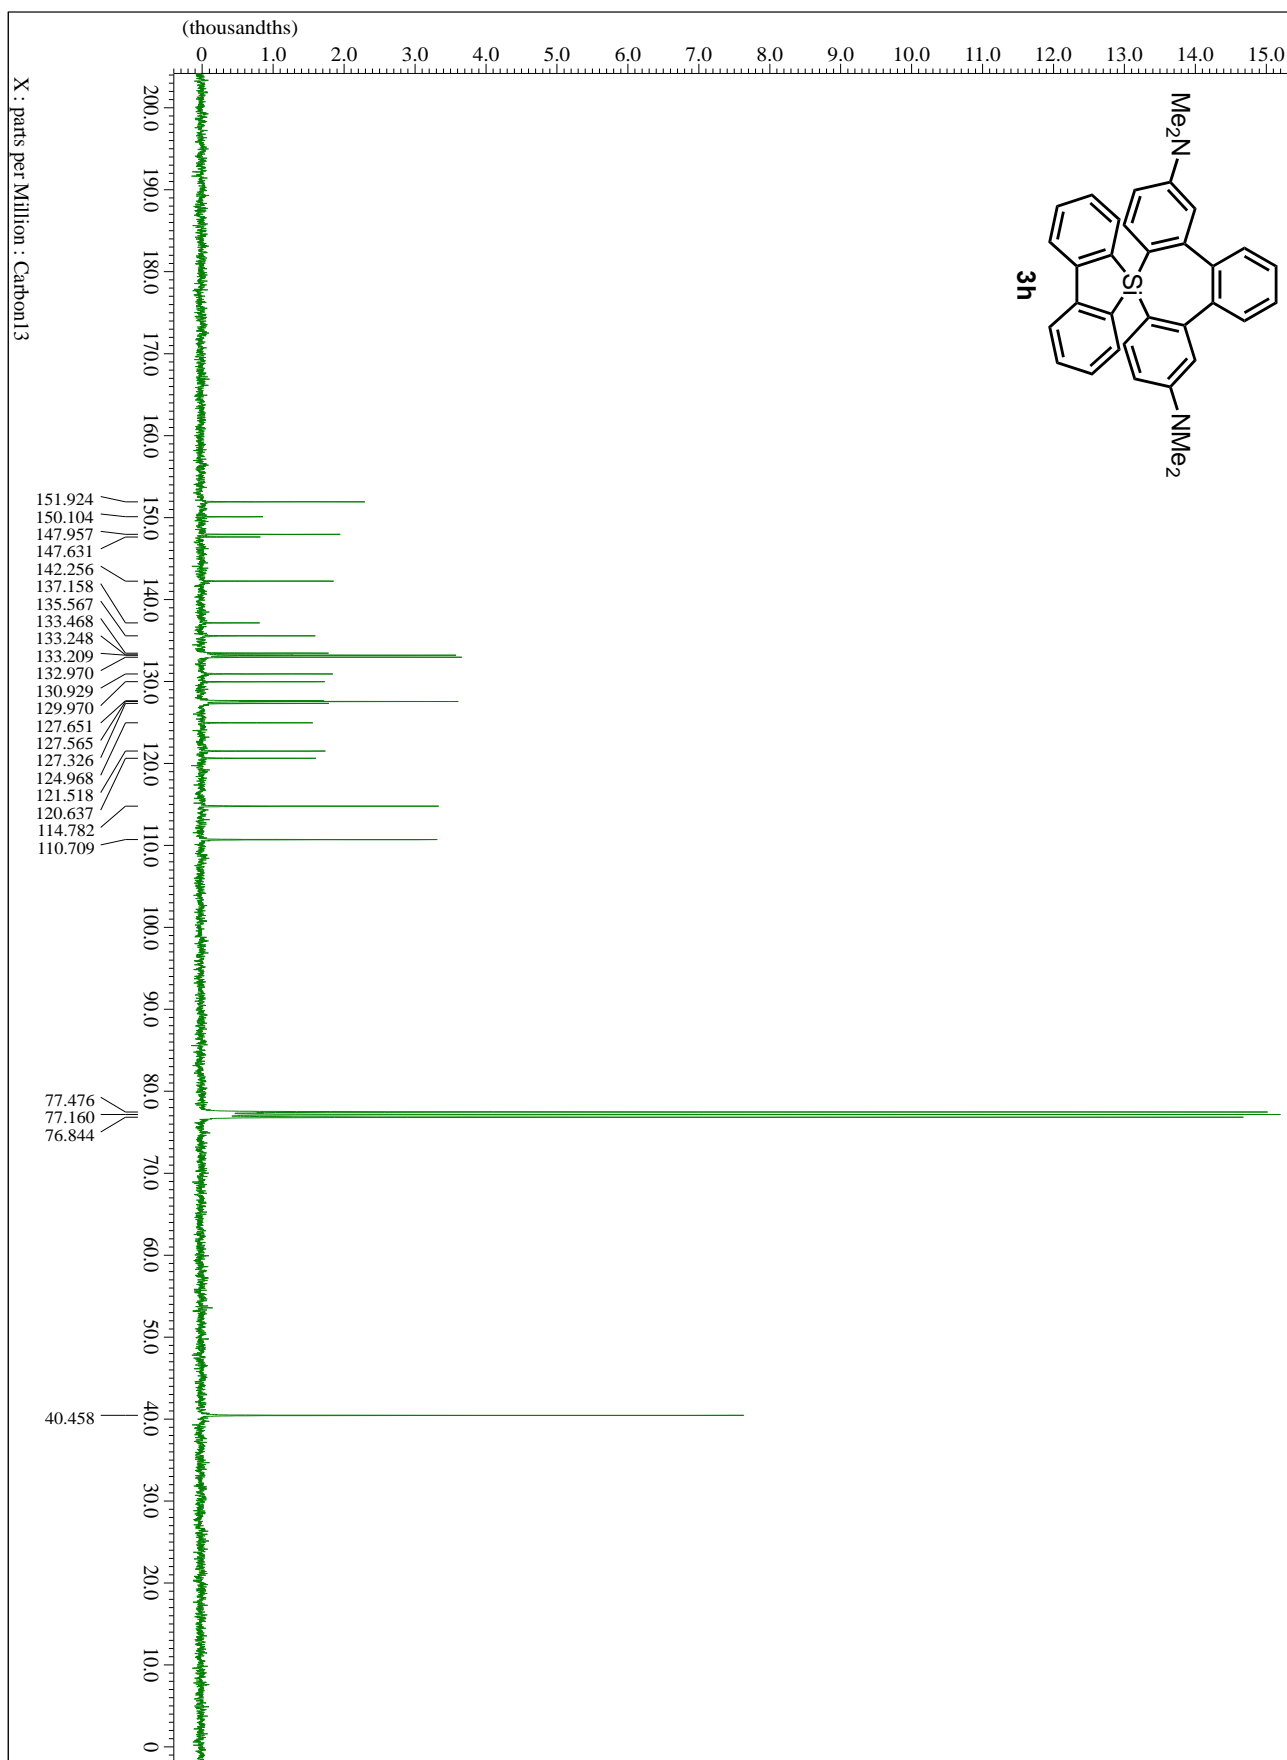

Figure S32. <sup>13</sup>C NMR of **3h** in CDCl<sub>3</sub>.

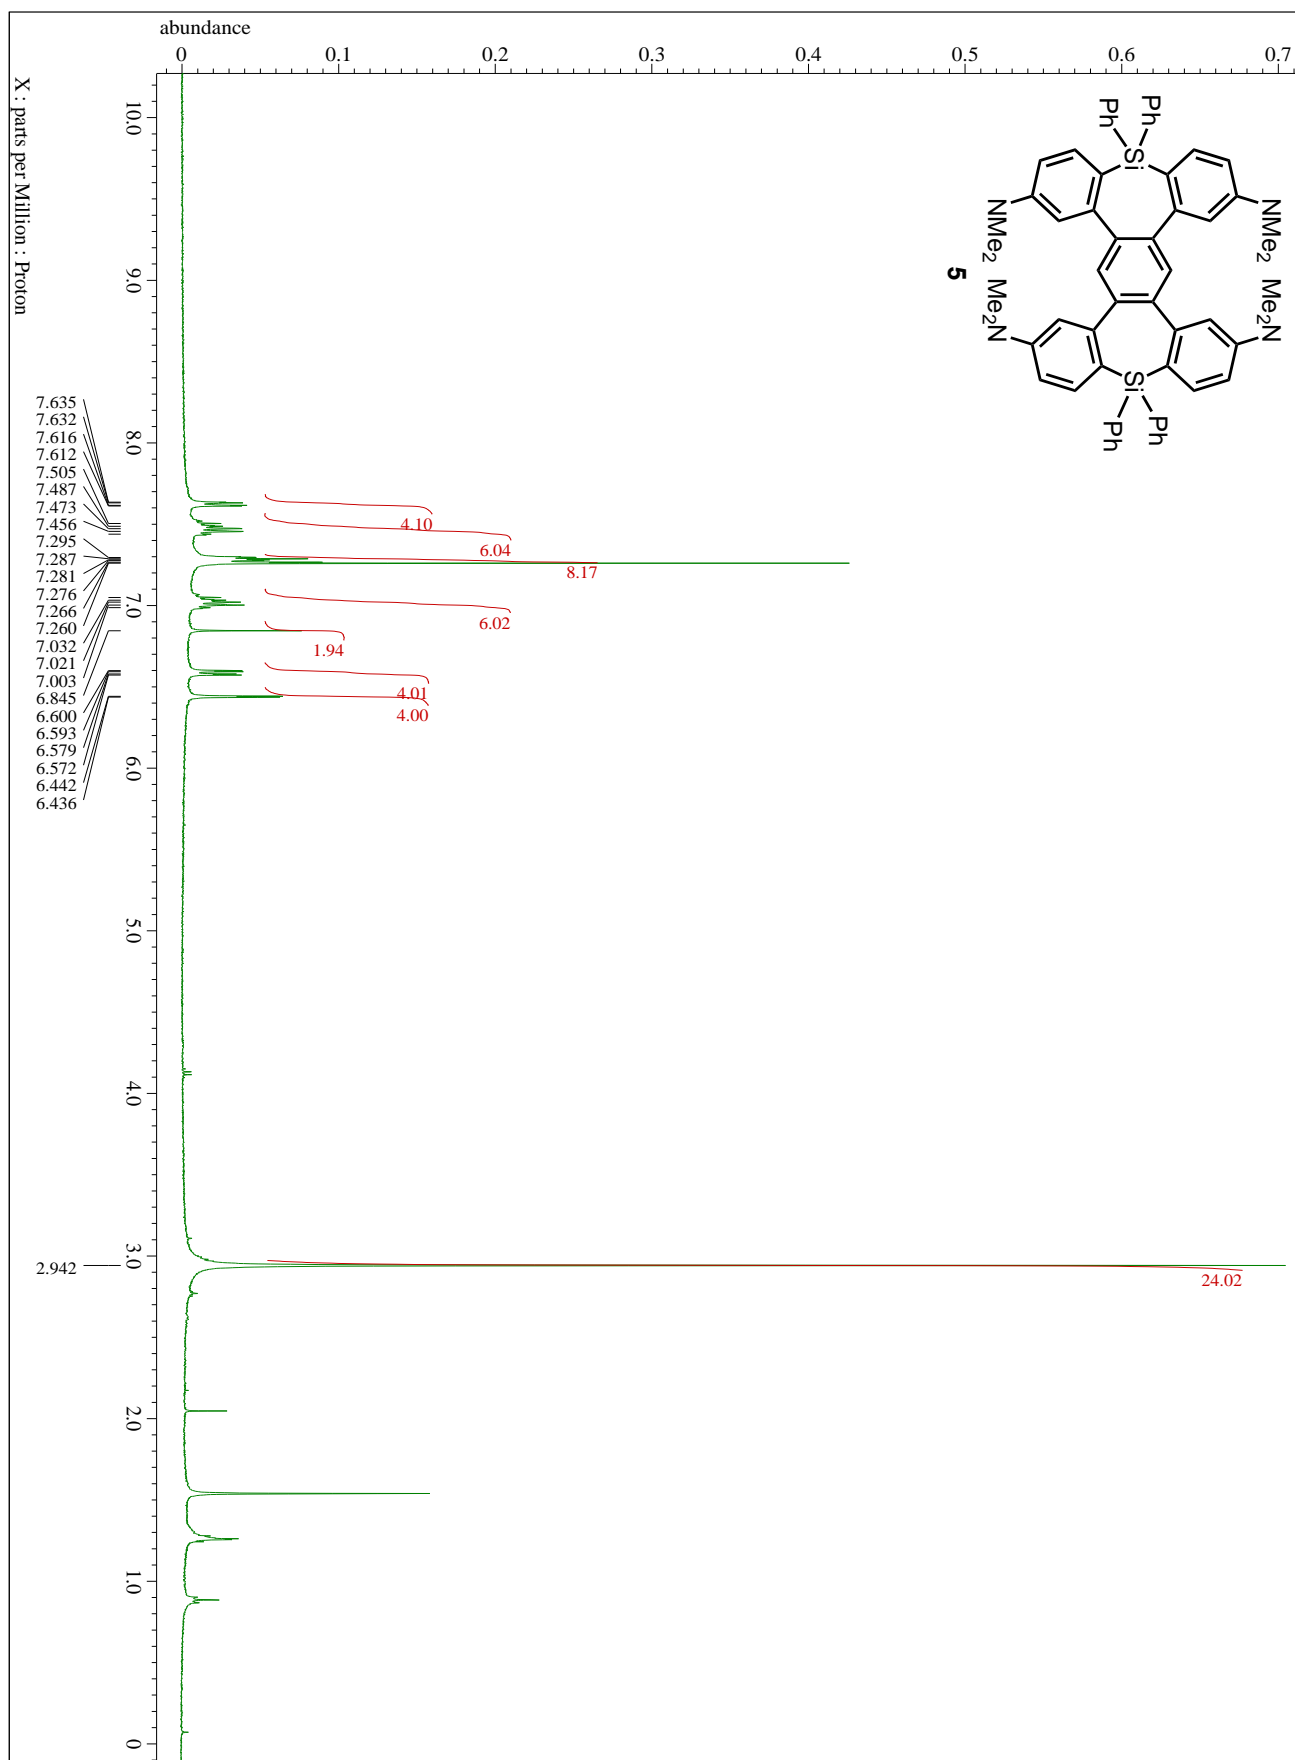

Figure S33. <sup>1</sup>H NMR of **5** in CDCl<sub>3</sub>.

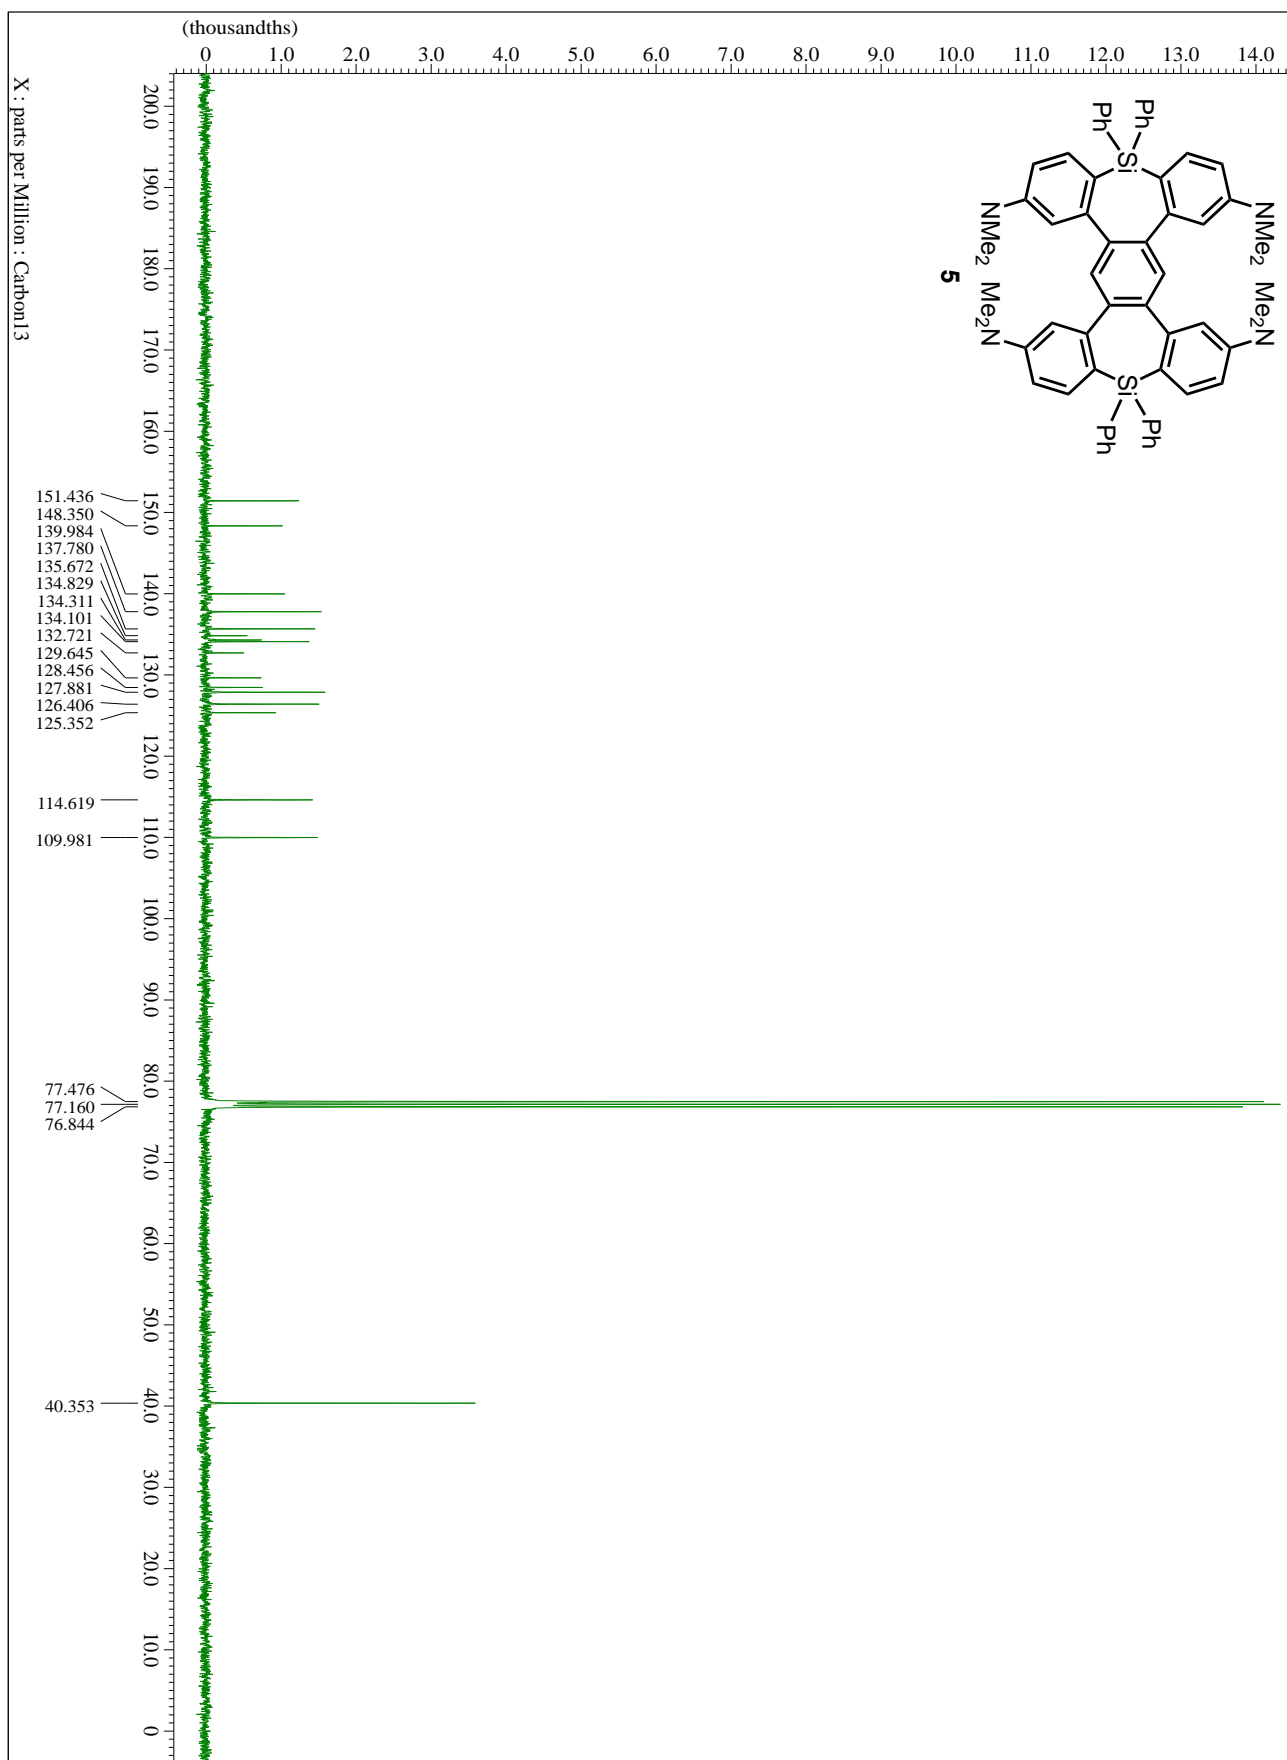

Figure S34. <sup>13</sup>C NMR of **5** in CDCl<sub>3</sub>.

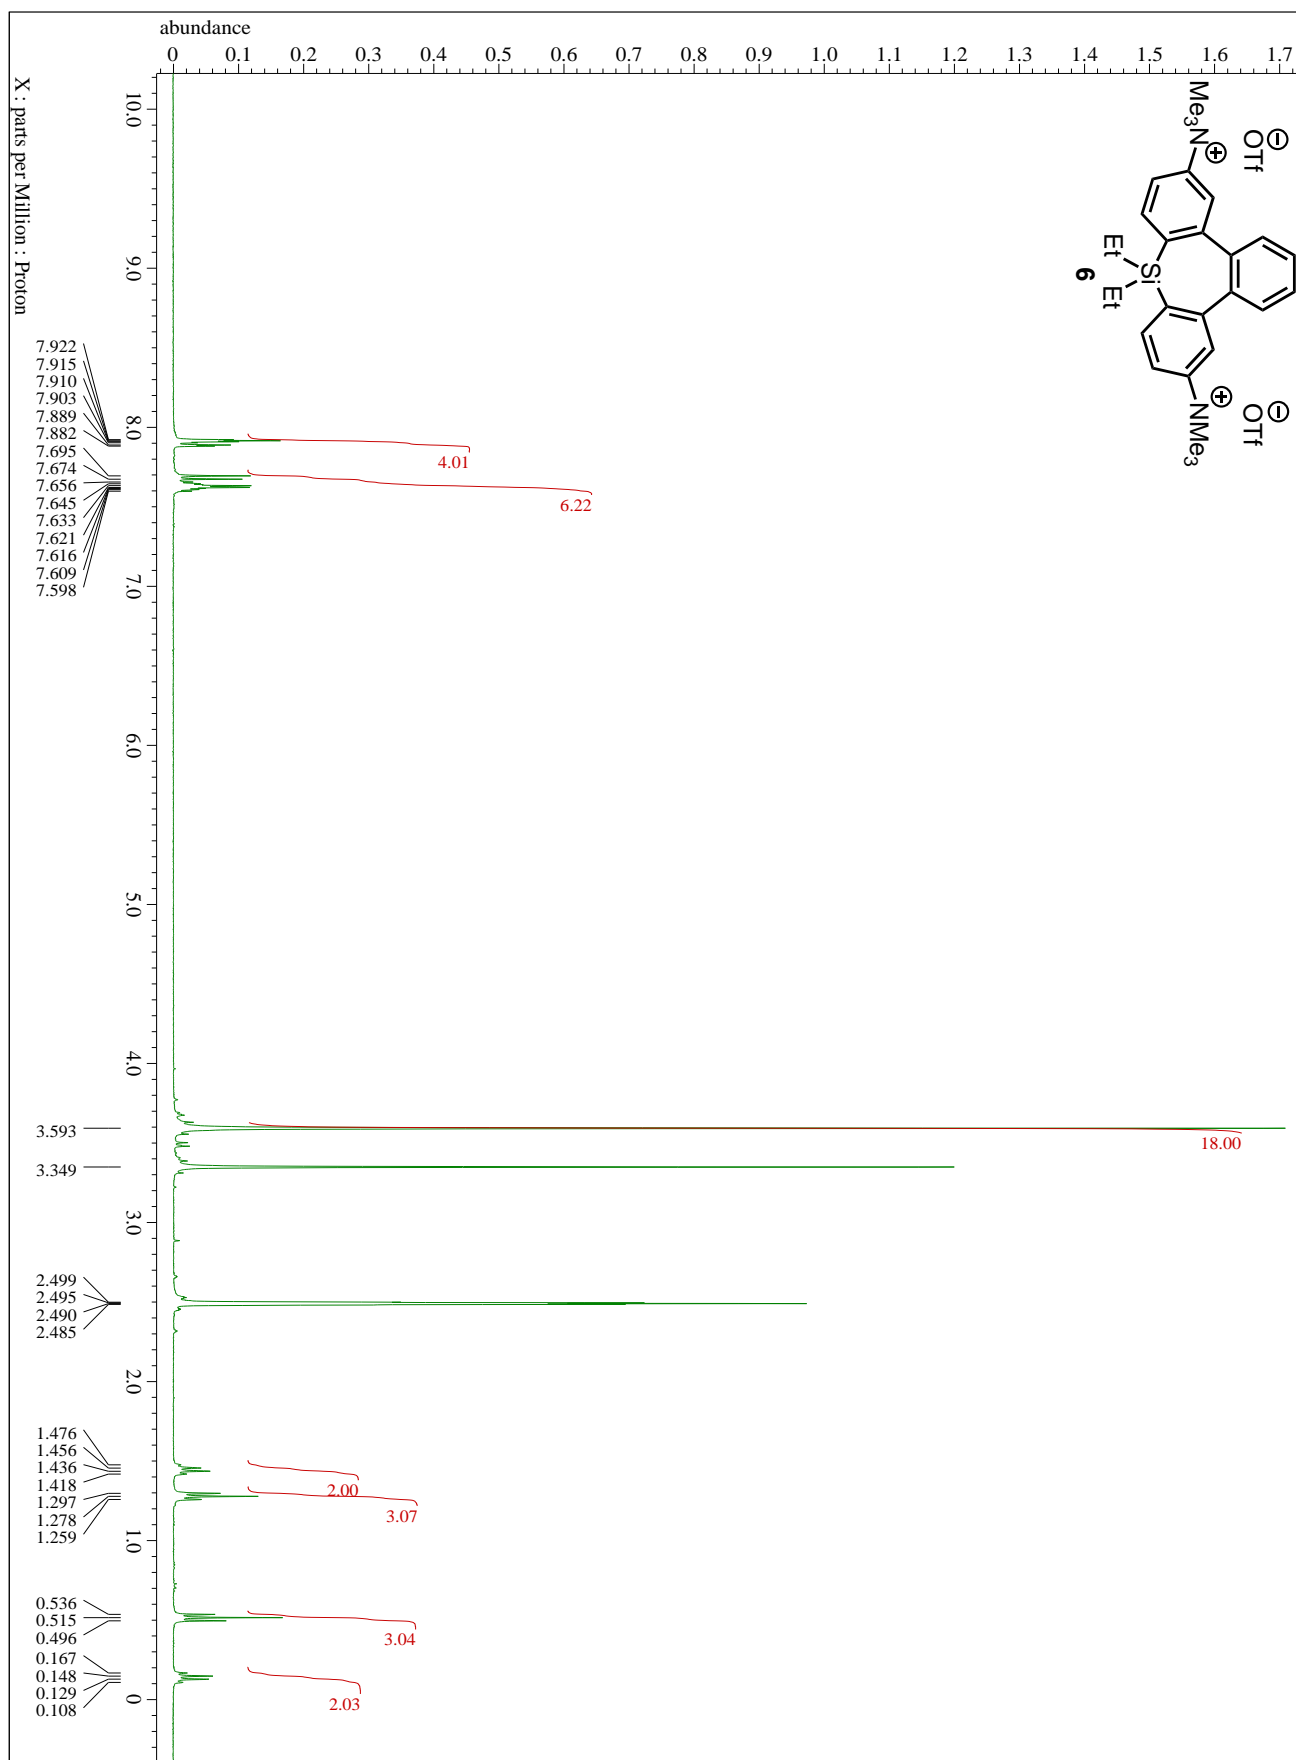

**Figure S35.** <sup>1</sup>H NMR of **6** in DMSO-*d*<sub>6</sub>.

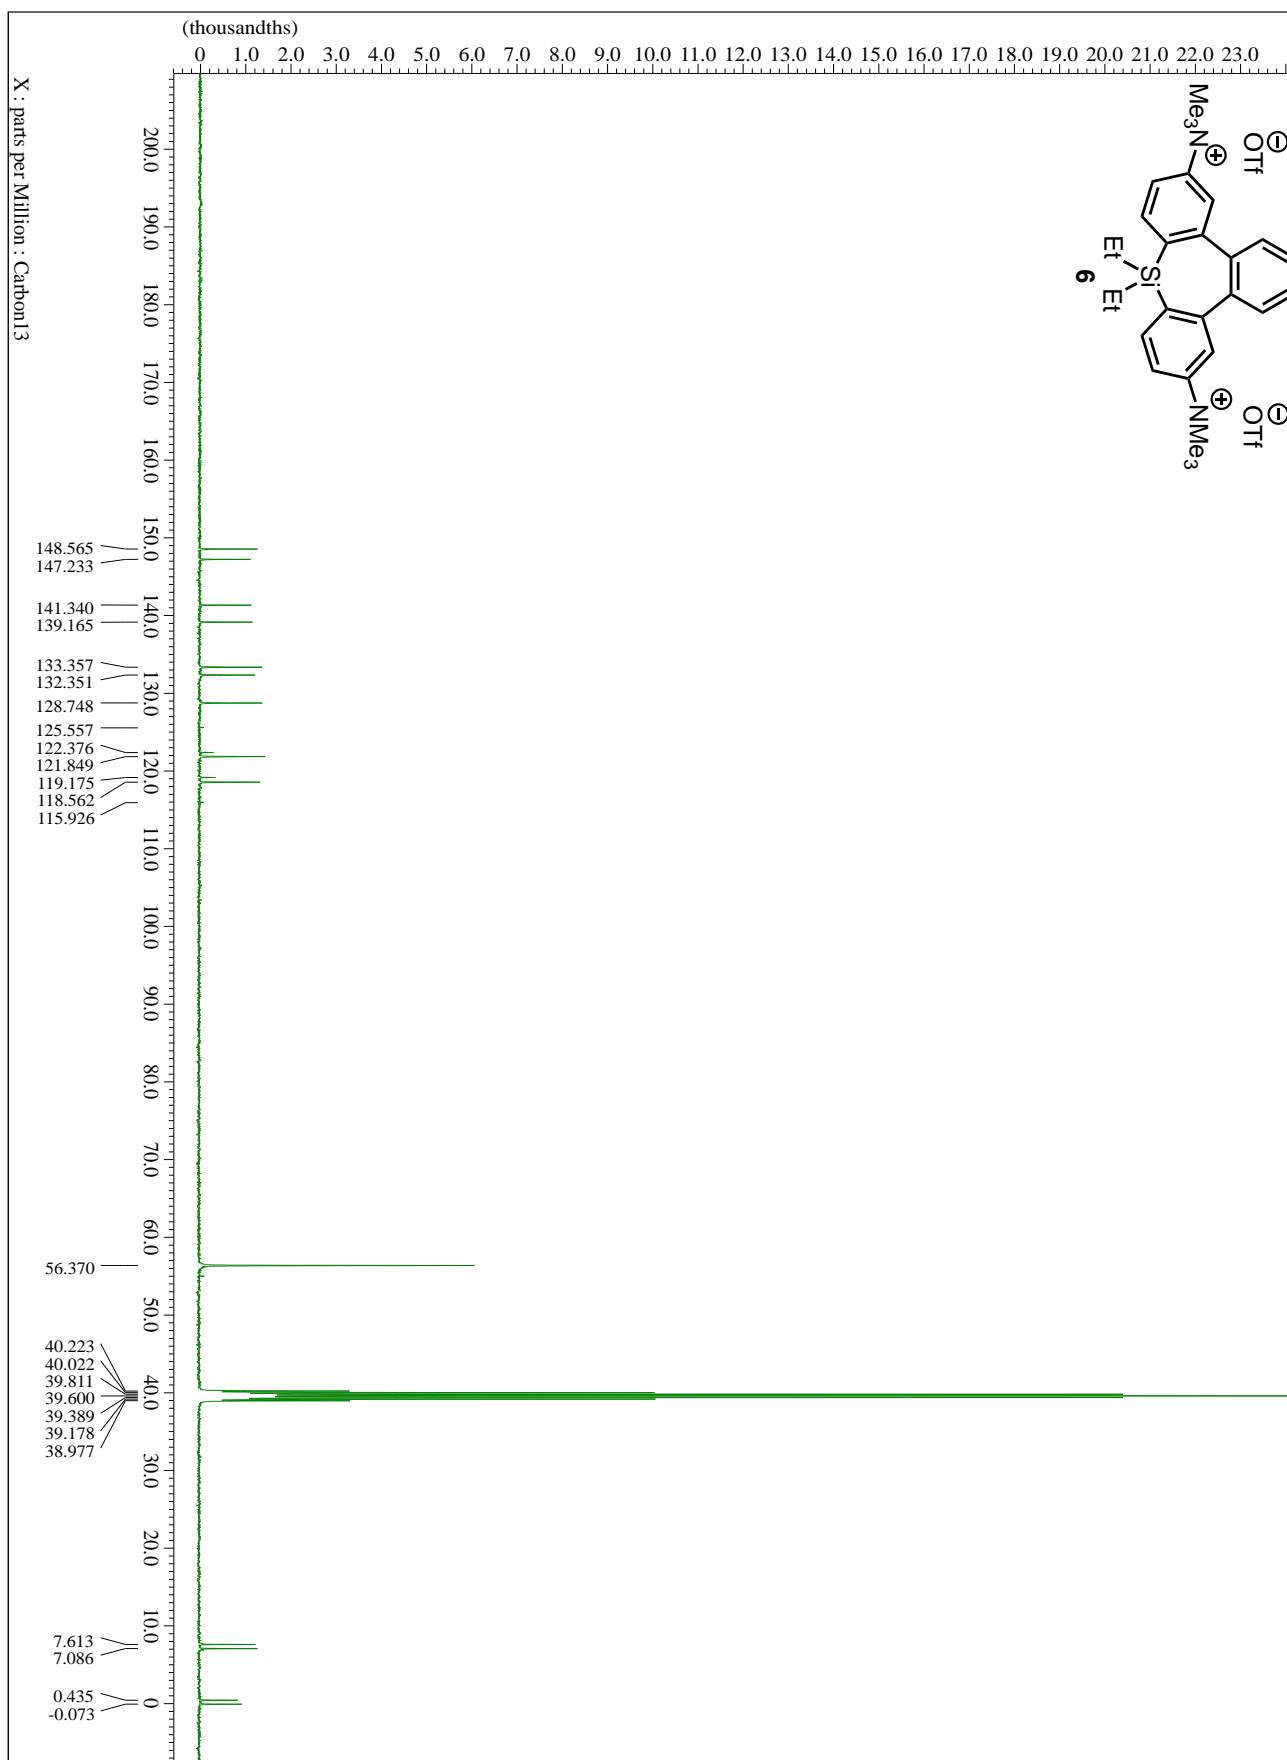

**Figure S36.** <sup>13</sup>C NMR of **6** in DMSO-*d*<sub>6</sub>.



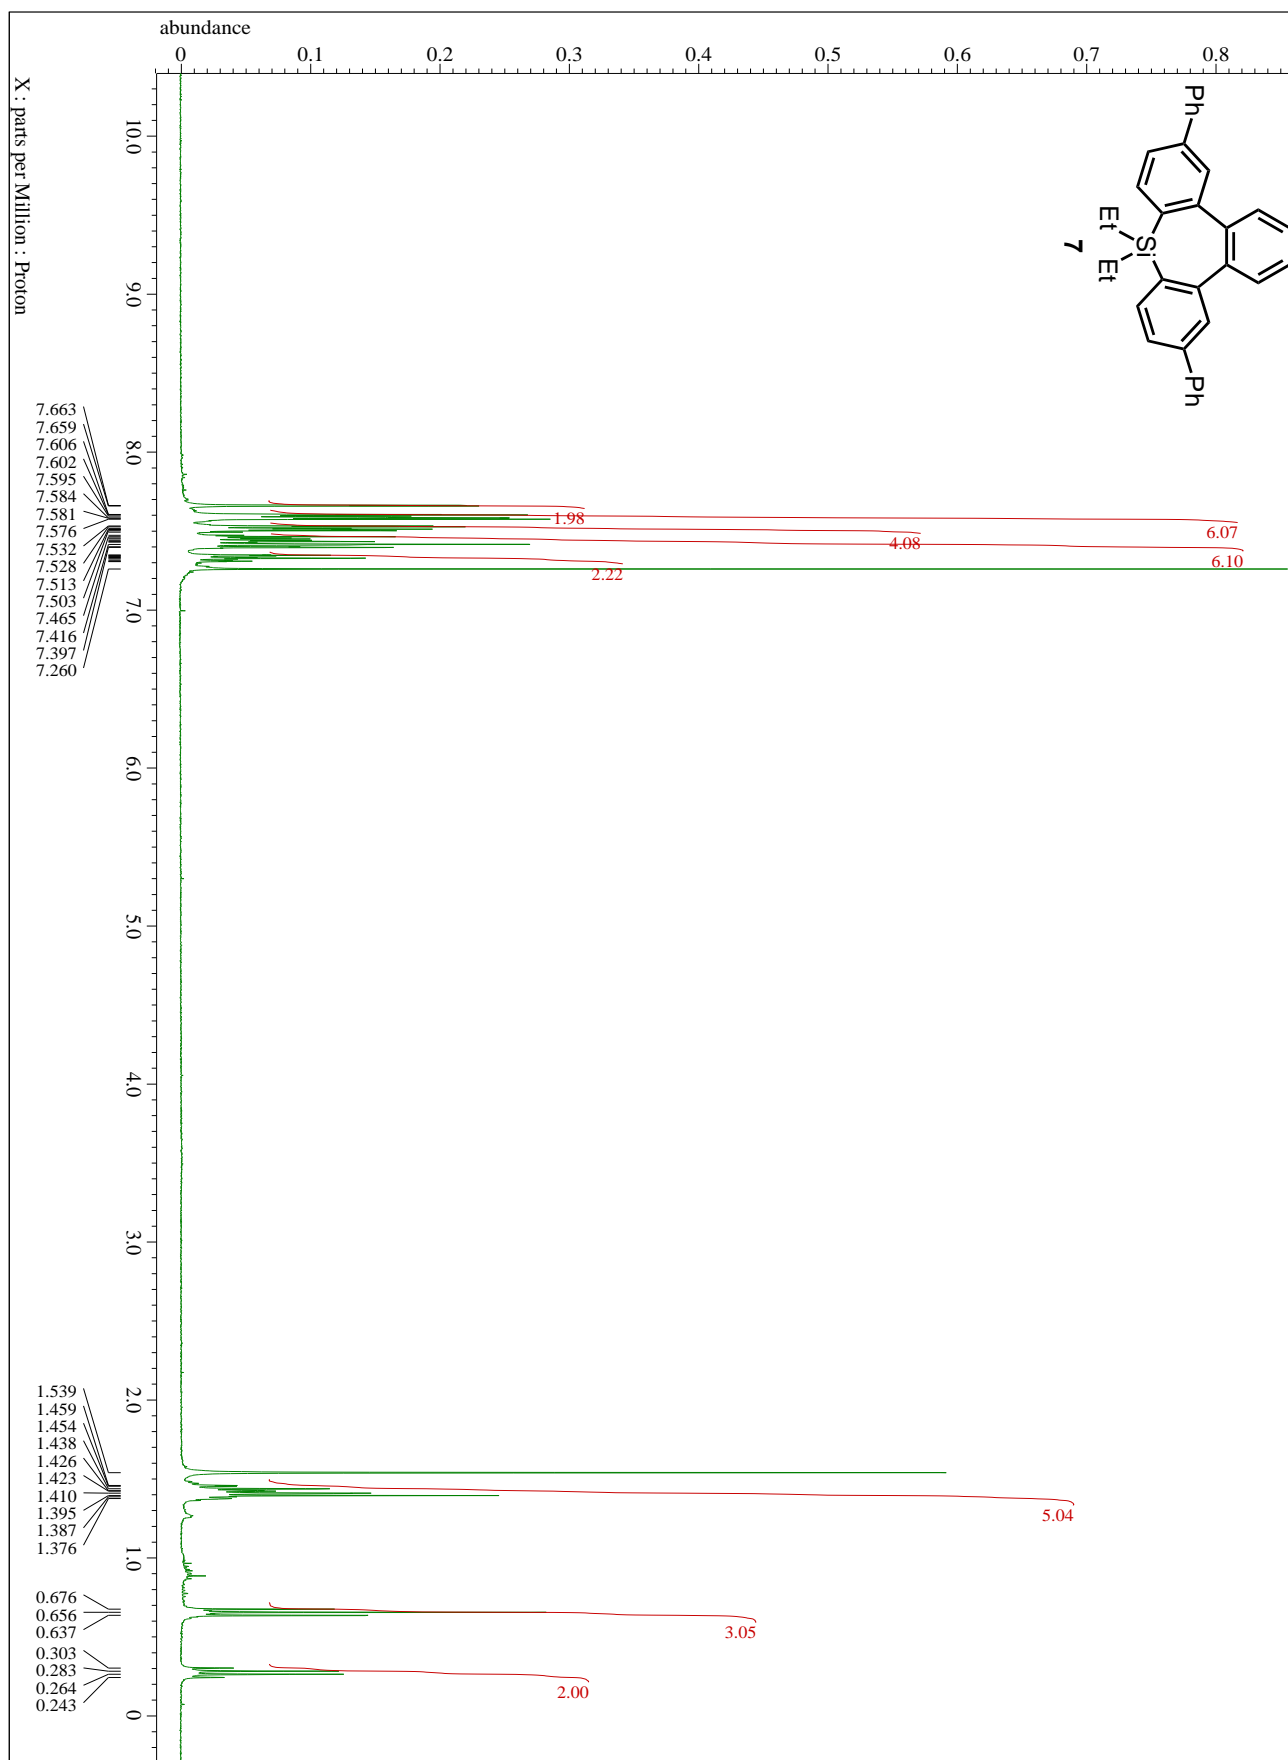

Figure S37. <sup>1</sup>H NMR of 7 in CDCl<sub>3</sub>.

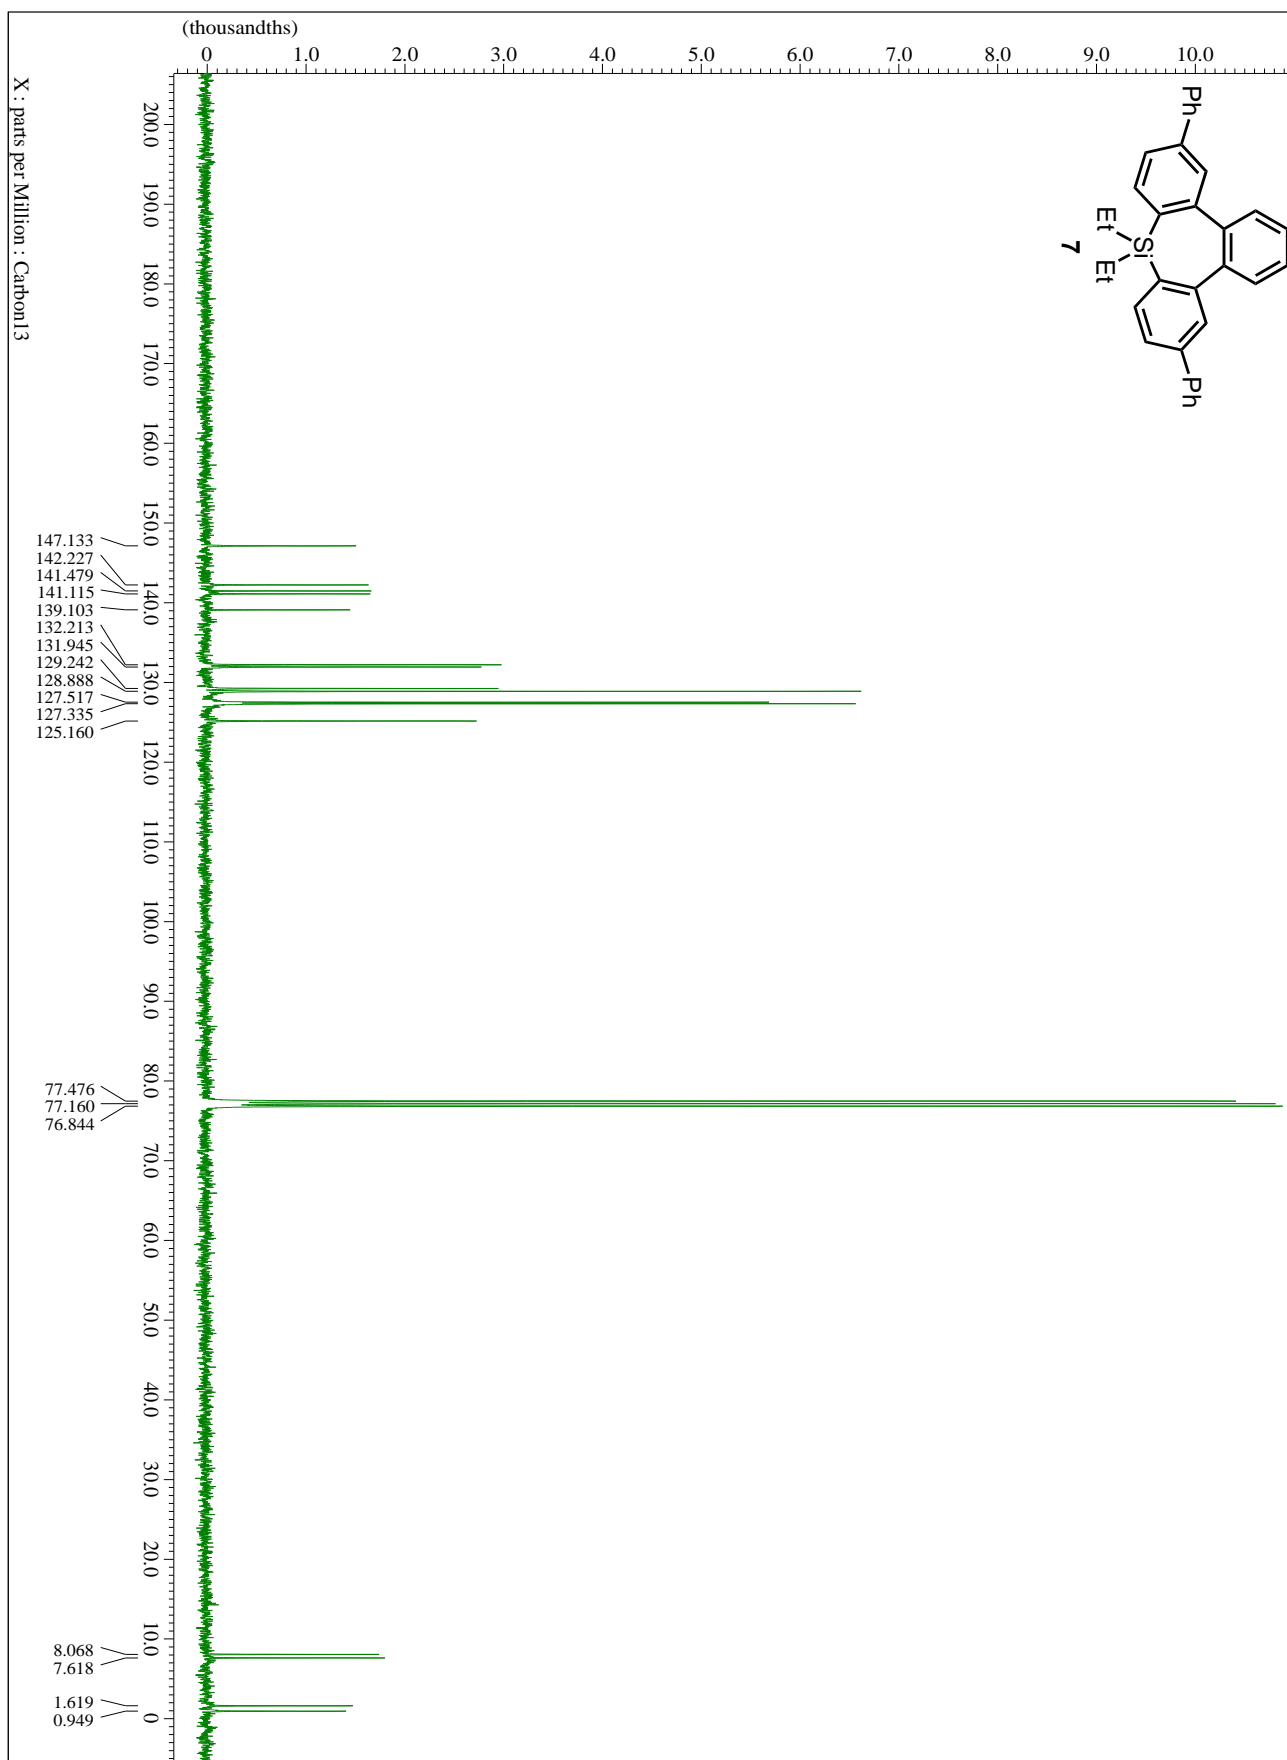

Figure S38.  $^{13}\text{C}$  NMR of **7** in  $\text{CDCl}_3$ .

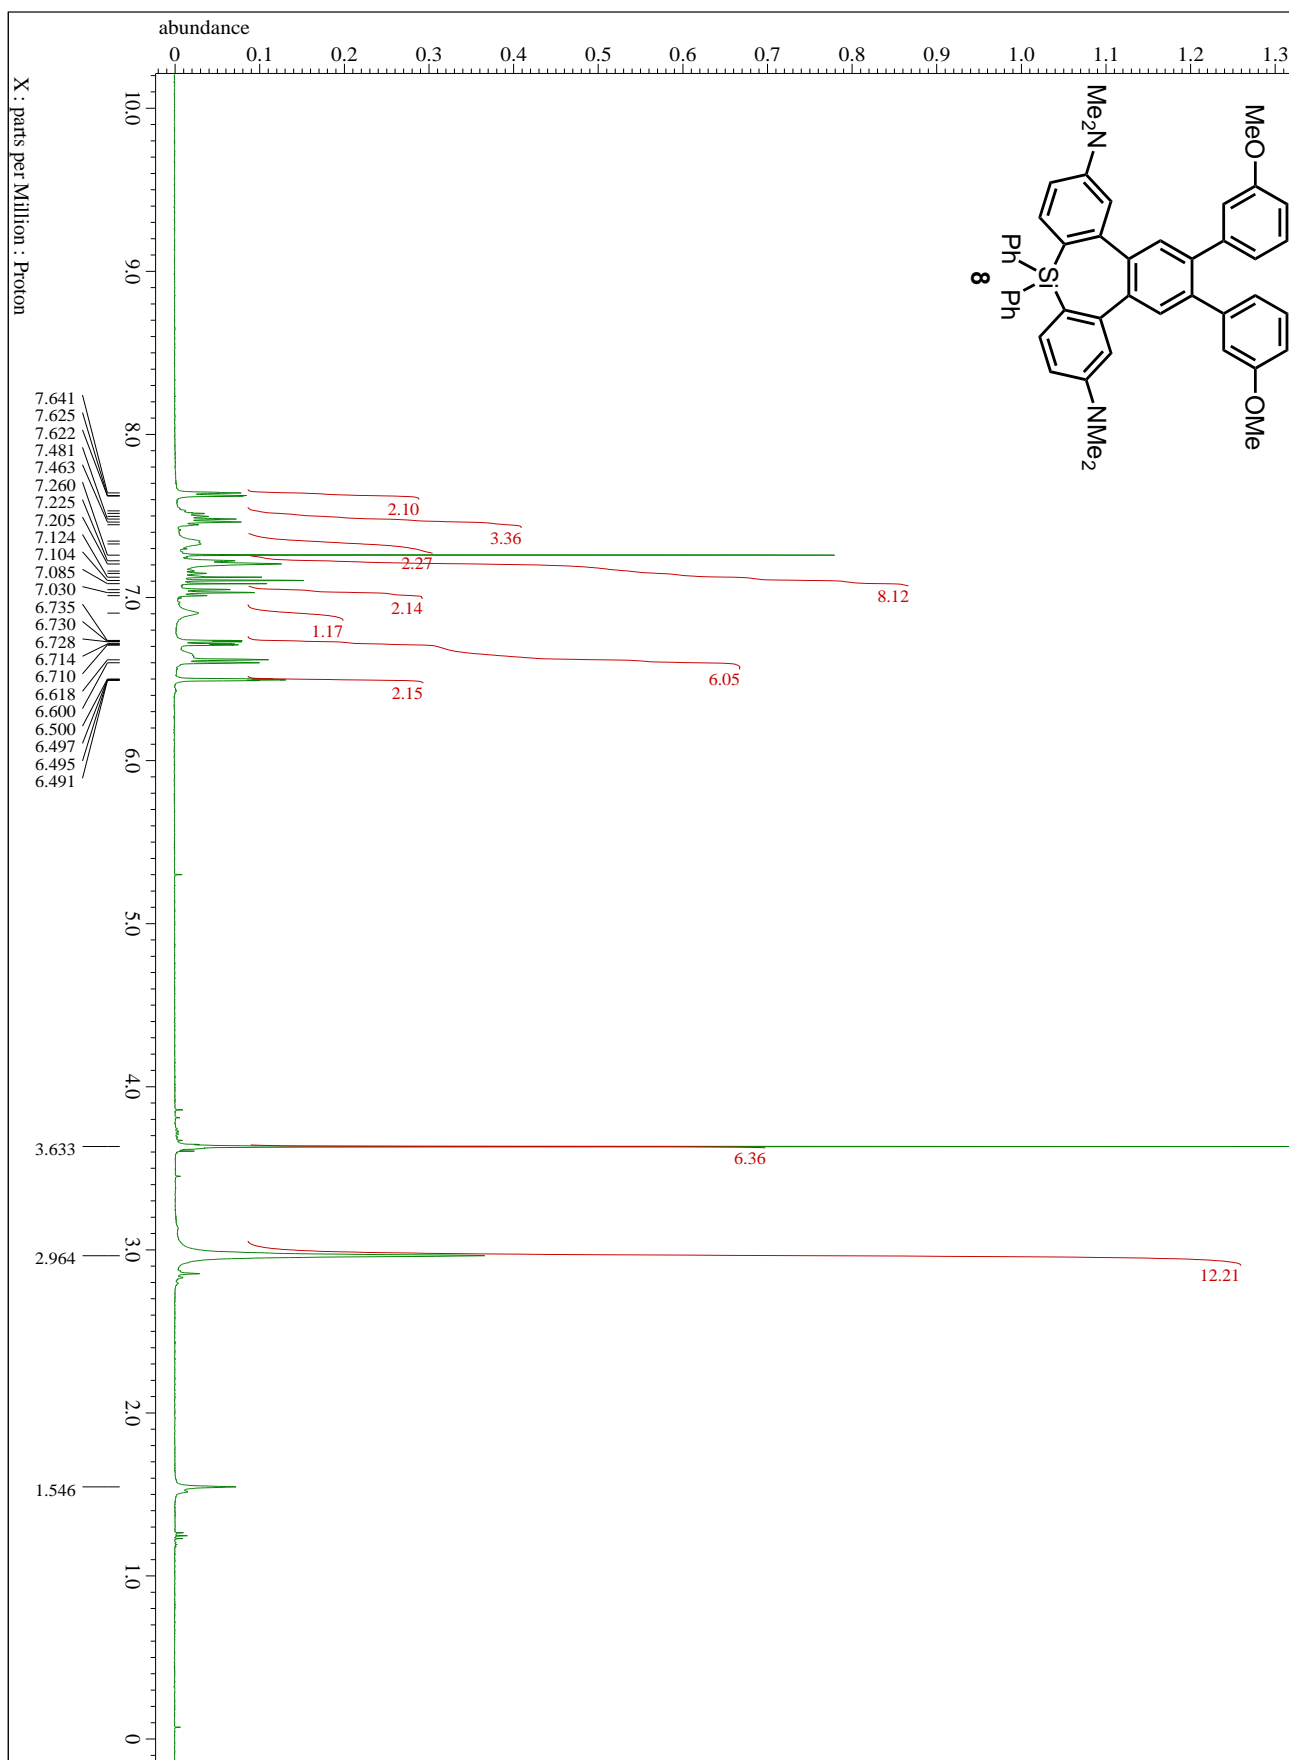

Figure S39.  $^1\text{H}$  NMR of **8** in  $\text{CDCl}_3$ .

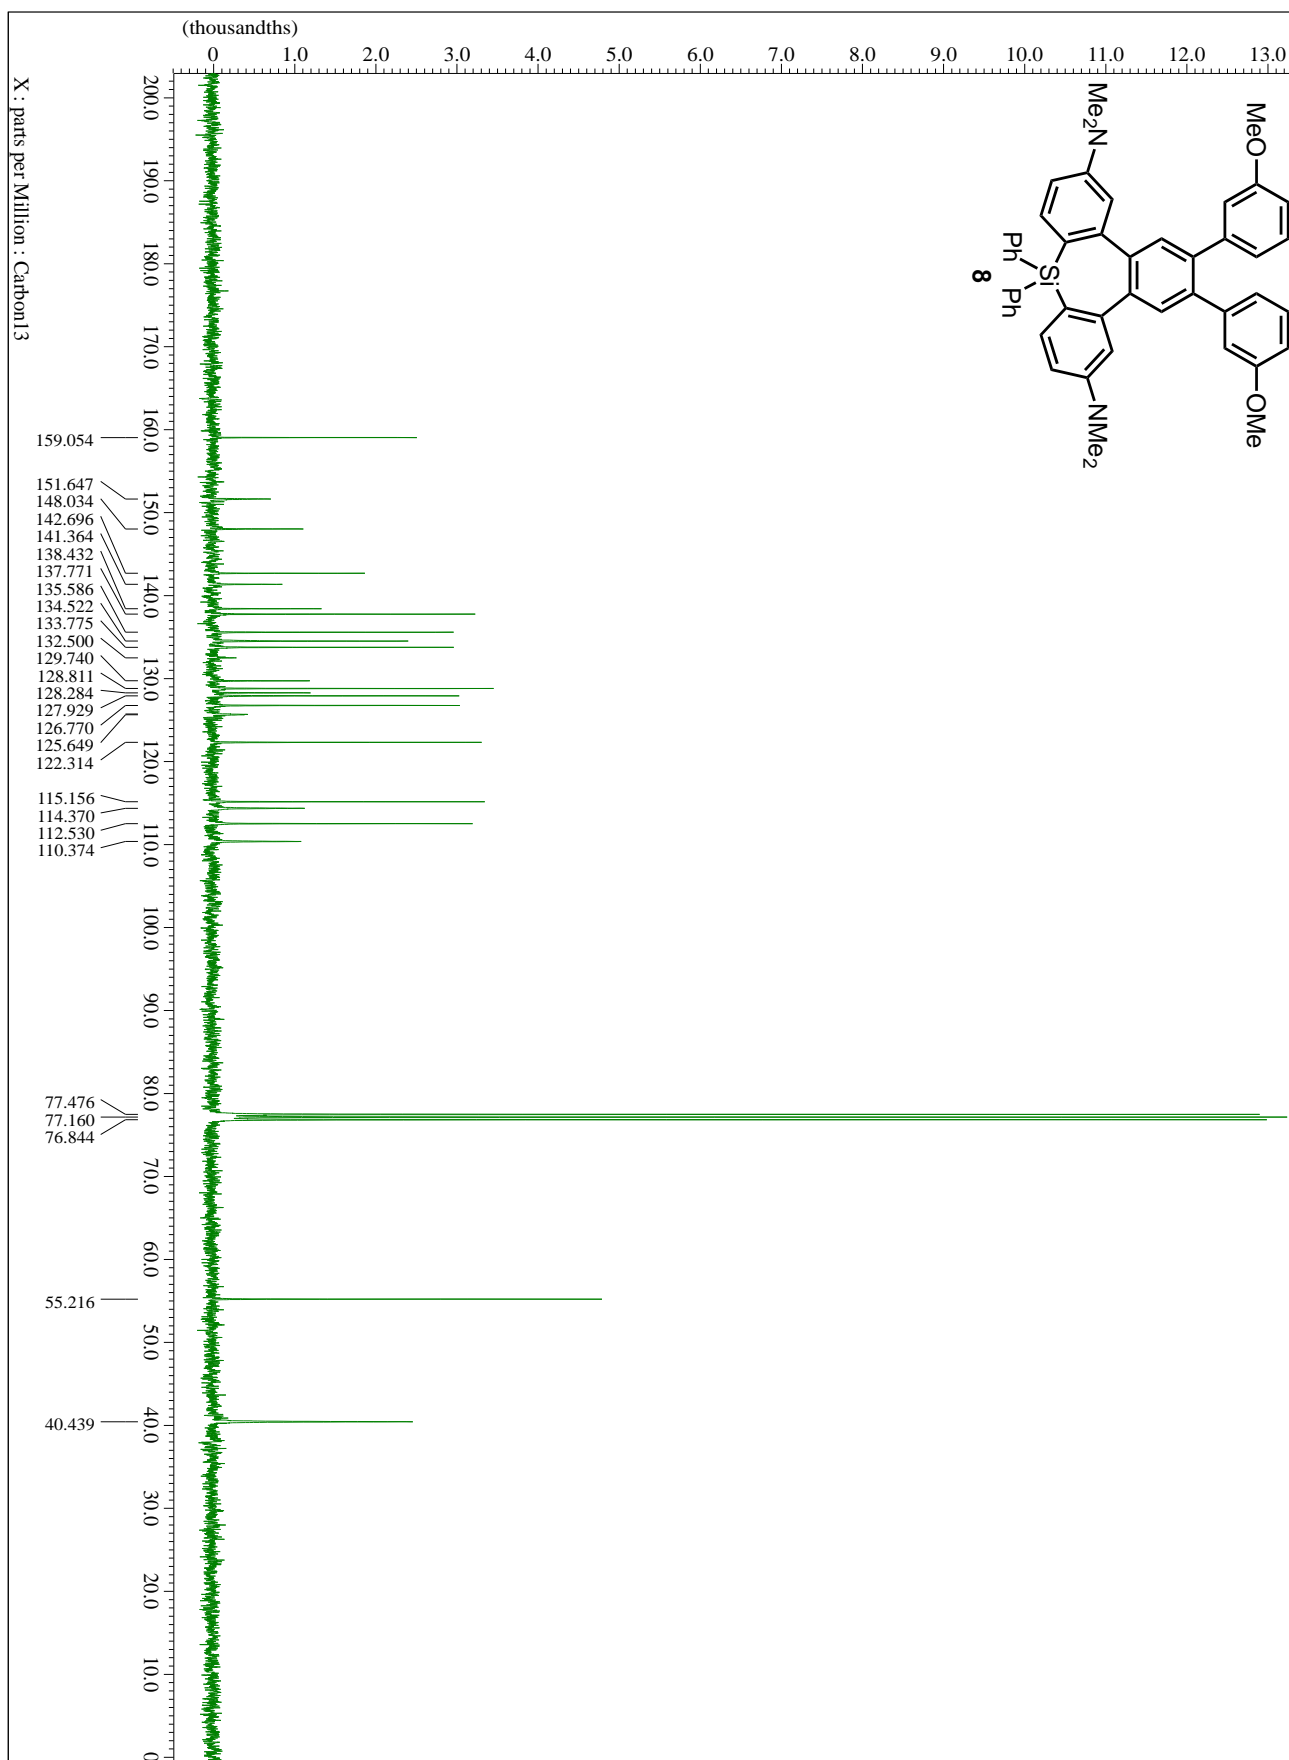

**Figure S40.** <sup>13</sup>C NMR of **8** in CDCl<sub>3</sub>.

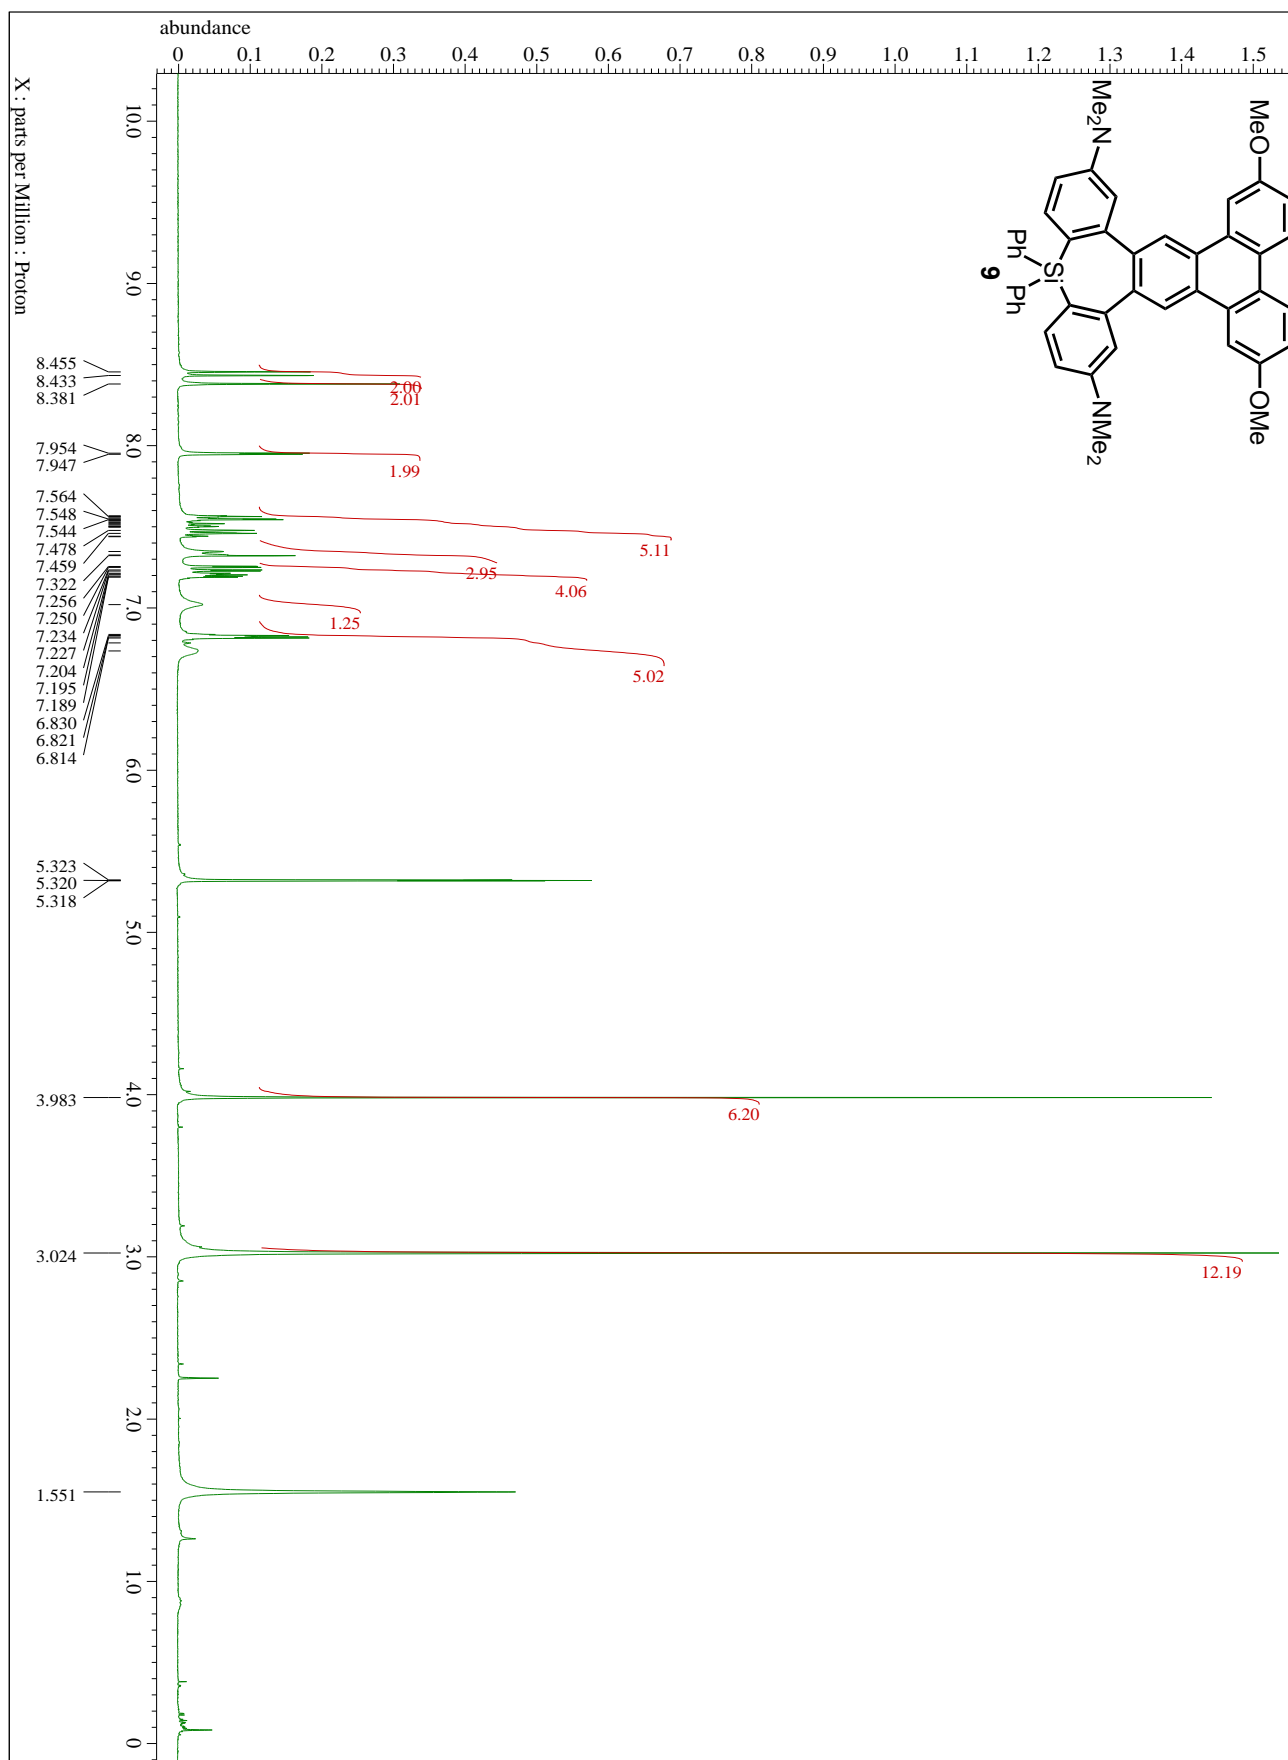

**Figure S41.** <sup>1</sup>H NMR of **9** in CD<sub>2</sub>Cl<sub>2</sub>.

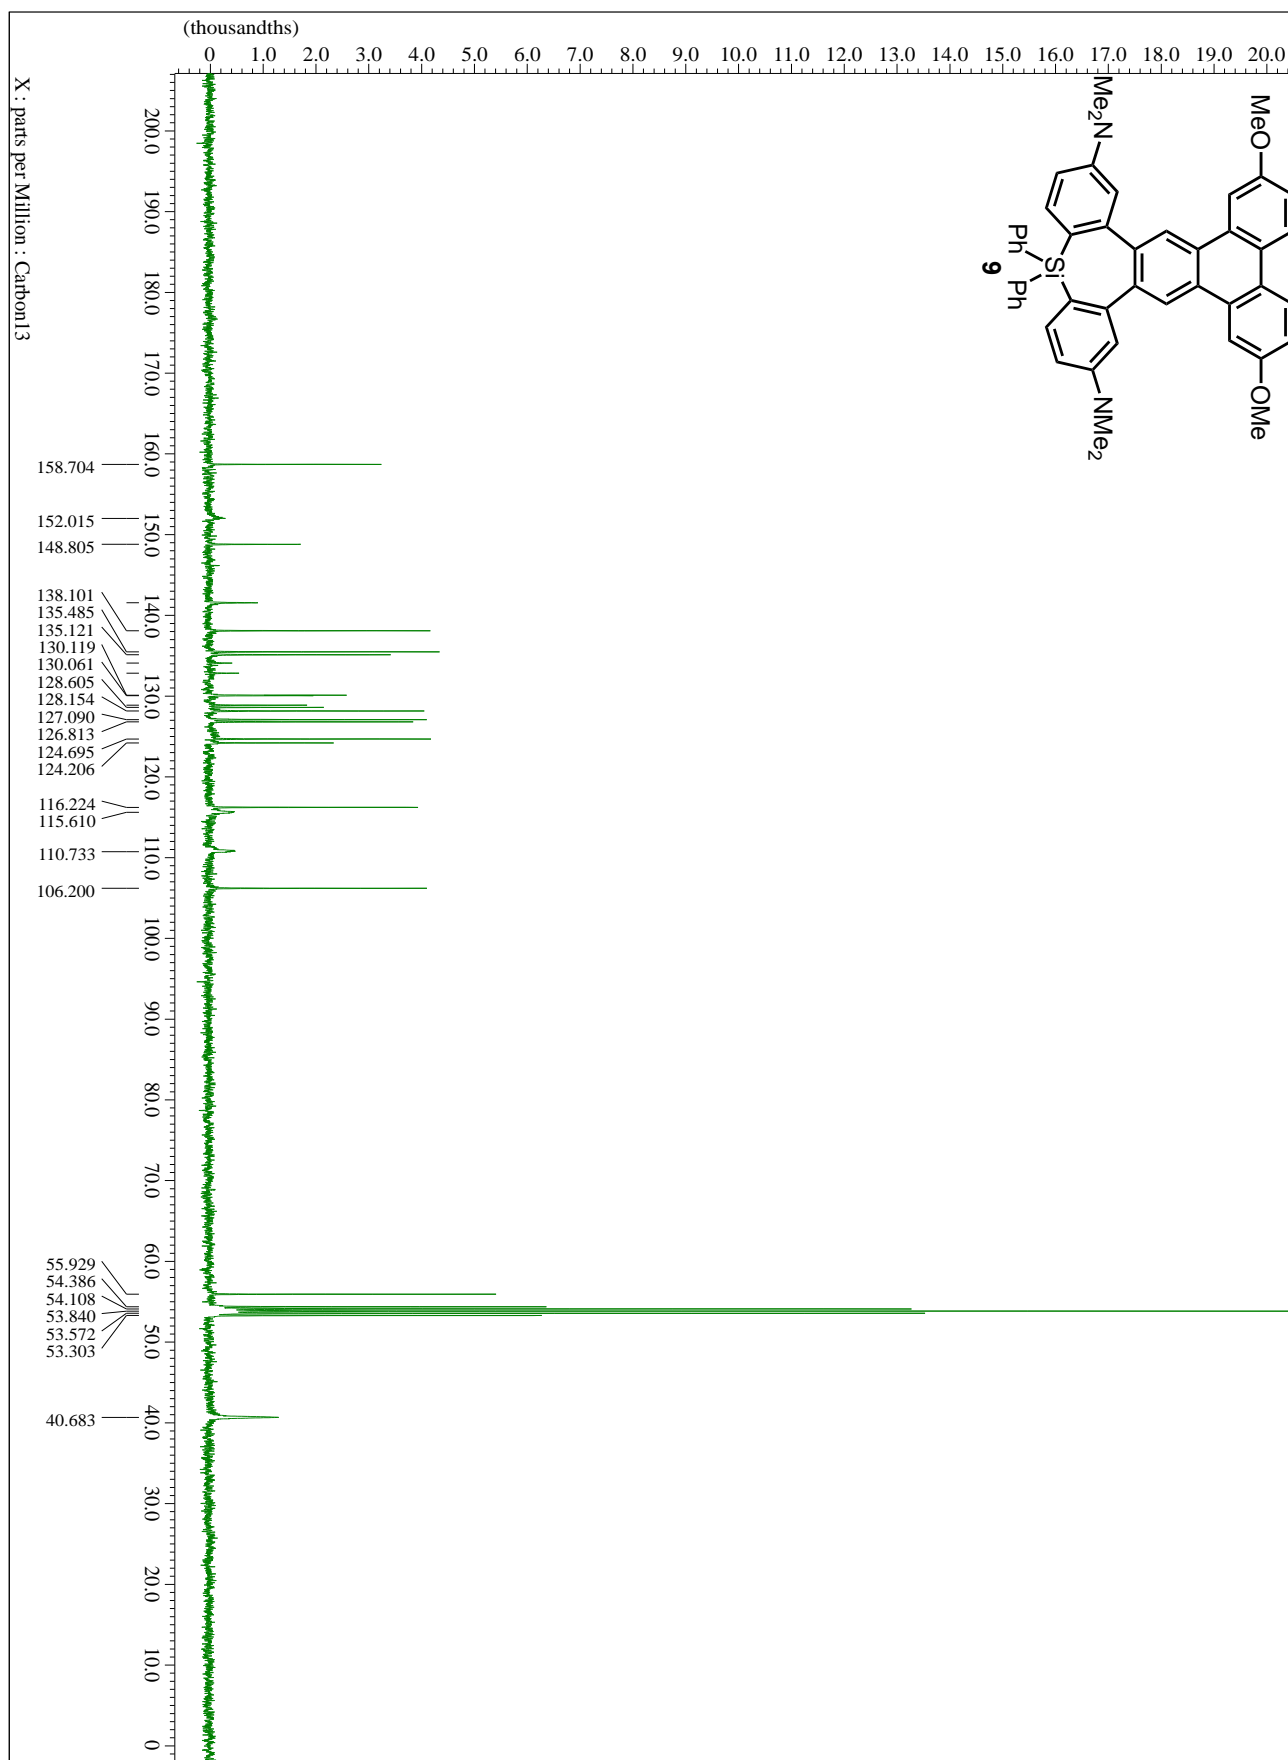

Figure S42.  $^{13}\text{C}$  NMR of **9** in  $\text{CD}_2\text{Cl}_2$ .
